# Supplementary material
Source: publisher figshare collection journal article supplement (https://acs.figshare.com/ndownloader/files/3620001)
Supplement: Supplementary file 1 [file 3620001]

# Supporting Information

## Measurements of methane emissions from natural gas gathering facilities and processing plants: measurement results

*Austin L. Mitchell<sup>a</sup>, Daniel S. Tkacik<sup>a</sup>, Joseph R. Roscioli<sup>d</sup>, Scott C. Herndon<sup>d</sup>, Tara I. Yacovitch<sup>d</sup>, David M. Martinez<sup>b</sup>, Timothy L. Vaughn<sup>b</sup>, Laurie L. Williams<sup>e</sup>, Melissa R. Sullivan<sup>a</sup>, Cody Floerchinger<sup>d</sup>, Mark Omara<sup>a</sup>, R. Subramanian<sup>a</sup>, Daniel Zimmerle<sup>c</sup>, Anthony J. Marchese<sup>b</sup>, Allen L. Robinson<sup>a,\*</sup>*

<sup>a</sup>Department of Mechanical Engineering, Carnegie Mellon University, Pittsburgh, PA 15213;

<sup>b</sup>Department of Mechanical Engineering, Colorado State University, Fort Collins, CO 80523;

<sup>c</sup>The Energy Institute, Colorado State University, Fort Collins, CO 80523;

<sup>d</sup>Aerodyne Research Inc., Billerica, MA 01821;

<sup>e</sup>Fort Lewis College, Durango, CO 81301

\*corresponding author: [alr@andrew.cmu.edu](mailto:alr@andrew.cmu.edu); 412 268-3657.

## Contents

|                                                                             |     |
|-----------------------------------------------------------------------------|-----|
| A – Facility selection process .....                                        | S3  |
| B – Facility information collected by onsite observer .....                 | S7  |
| C – Summary figures of onsite information .....                             | S16 |
| D – Non-partner equipment collocated with study facilities .....            | S17 |
| E – Documented changes to equipment and/or facility state(s).....           | S18 |
| F – Observations from infrared camera surveys at gathering facilities ..... | S19 |
| G – Brief description of tracer flux methodology.....                       | S22 |
| H –Tracer flux measurements results .....                                   | S24 |
| I – Measurements of intermittent methane release events .....               | S31 |
| J – Downwind recovery of exhaust stack methane .....                        | S32 |
| K – Comparison of facility level emissions at processing plants .....       | S41 |
| L – Multiple linear least squares regression variables and results.....     | S43 |
| M – Summary of high emitters .....                                          | S48 |
| N – Cumulative distributions for C and C/D facilities .....                 | S50 |
| References.....                                                             | S52 |

## **A – Facility selection process**

This section provides additional details on the facility selection process, including some discussion of potential biases. The facility selection was performed by the study team, using data and other information provided by the partner companies. The partner companies were only involved at discrete times during the process and were not involved in final facility selection.

The study team was provided a list of all five partner companies' G&P assets (>700 facilities) in August 2013. Their G&P assets were organized into 20 geographic clusters, which ranged in size from eight to 76 facilities. The number of sampling weeks per cluster was then defined to maximize coverage of geography and of gas types while considering logistics and the proportion of facilities owned by each partner company. To avoid oversampling of one company, the study team regularly examined the balance of sampled facilities and adjustments were made as needed to maintain this balance.

Approximately three weeks prior to conducting measurements in a particular geographic cluster, the study team performed an initial desktop screening of all G&P facilities in the target cluster. The screening process involved using aerial imagery (Google Earth) to remove facilities with limited road access on their periphery (0.5-2 km) or facilities that were located very near obvious potential sources of methane interference. The list of the remaining facilities, generally 1/3 to 1/2 of the original list for each cluster, was shared with partner companies. At times in this process, the study team sought feedback from the partner companies about potential issues with road access or potential sources of interference (e.g., non-partner natural gas facilities). The partner companies notified the study team of facilities that could not be sampled because of issues such as commissioning, decommissioning, transactions (sale of asset), construction or litigation. The output from this process was a prescreened list of facilities deemed suitable for

tracer flux measurements in each cluster. Over the course of the field campaign the partner companies requested on fewer than 10 occasions that a facility not be sampled.

Final selection of most gathering facilities was made by the study team from the prescreened list the evening before or the day of sampling, considering road access, wind forecasts, and logistics. Selecting facilities “on the fly” greatly enhanced the success rate of the tracer teams (valid tracer flux data were obtained at 130 of the 136 facilities visited by the study team). The fact that most gathering facilities were selected “on the fly” also addresses questions about whether the study partners’ operations personnel could have prepared their facilities for sampling. As discussed in the main text (and summarized in SI E, Table S5), adjustments were made on some facilities by company personnel as part of normal operations. Sampling at processing plants was scheduled in advance to align with operator and operations schedules. Processing plants were staffed 24/7, and some of the higher throughput gathering facilities had daytime operators.

There are a number of potential biases within the facility selection process. One potential source of bias is that study facilities were not chosen randomly. Random selection was not possible because many of the facilities lacked suitable roads on their periphery for the mobile lab. Gathering facilities deemed most suitable for tracer flux measurement based on downwind road access and meteorological conditions were selected in all cases. If the prospects for successful tracer flux measurement were the same at two facilities (in terms of interference and road access relative to wind), the study team also considered logistical factors (e.g., proximity to hotel). Any factors unrelated to the success of tracer flux measurement or the safety of the tracer teams were not considered the selection process.

This study would not have been possible without the facility access provided by the partner companies. This access allowed tracer gases to be released onsite, which reduces the uncertainty of the measured emission rates. The study partners also provided facility data such as methane throughput, gas composition, equipment census and other facility information used to analyze the results. However, it is important to emphasize that the facility selection process was conducted by the study team, not the partner companies. Final decisions on facility selection were made by the study team.

In assessing the representativeness of the G&P facilities included in this study, an obvious consideration is the companies that participated in this study. The sum of gas gathered by the four partner companies with gathering facilities (about 5.9 trillion cubic feet) represents around a quarter of the marketed U.S. gas production in 2013 (26.7 trillion cubic feet).<sup>1</sup> Simple extrapolation (from the 738 gathering facilities owned by partner companies) suggests there are around 3,000 gas gathering facilities in the US. According to the Energy Information Administration 757 survey, there were 517 active processing plants in the lower-48 U.S. states in 2012.<sup>2</sup> The Oil & Gas Journal survey counted 606 processing plants in 2013.<sup>3</sup> While we cannot demonstrate that these five companies operate their facilities and control methane emissions in a manner that is representative of their peers, these companies do own a diverse set of G&P assets and operational practices appeared more closely related to geography (producing basin) than company. Differences among partner companies were examined by including a dummy variable for each company as an independent variable in the multiple linear least-squares regressions of ln-WAFLE (SI L). Statistically significant differences in ln-WAFLE were not found between any of the companies.

Another potential source of bias is due to the presence of collocated non-partner equipment (SI D). Other potential biases may exist at the cluster level. Weather conditions impacted company operations and the efficiency of the tracer teams. Unusually cold temperatures, brought on by repeated polar vortexes, occurred while sampling in some clusters. Cold weather protections were common in regions accustomed to freezing temperatures, these were much less common in others, potentially making certain equipment issues (e.g., frozen valves) more likely. Precipitation (rain, snow, and ice) and unfavorable wind conditions hampered tracer flux measurements in some clusters more than others, making facilities or downwind roads inaccessible at times.

## B – Facility information collected by onsite observer

**Table S1.** Facility #, sampling date, state, year built, facility type, gas type, and gas composition for 130 G&P facilities reported in this study. Inlet gas composition is from the most recent gas chromatography analysis performed by study partners and is reported in mole fractions (mol/mol). Analysis dates ranged from a couple of days to a couple of years before the sampling date. Average mole fraction is reported for facilities with multiple inlets. NR indicates not recorded, usually because the value was unknown. (CBM = coal bed methane)

| Facility # | Sampling date | State | Year Built | Facility Type | Gas Type             | % CH <sub>4</sub> | % C <sub>2</sub> H <sub>6</sub> | % C <sub>3</sub> H <sub>8</sub> | % C <sub>4</sub> + | % CO <sub>2</sub> | % N <sub>2</sub> | % H <sub>2</sub> S |
|------------|---------------|-------|------------|---------------|----------------------|-------------------|---------------------------------|---------------------------------|--------------------|-------------------|------------------|--------------------|
| 1          | 2/6/2014      | TX    | 2012       | C             | Shale                | 77.1              | 12.9                            | 5.3                             | 3.3                | 1.0               | 0.2              | 0.22               |
| 2          | 4/8/2014      | UT    | 2004       | C             | Shale                | 90.7              | 5.1                             | 1.8                             | 1.4                | 0.9               | 0.1              | -                  |
| 3          | 2/13/2014     | TX    | 2010       | C             | Tight Sands          | 91.2              | 4.1                             | 1.0                             | 1.0                | 1.5               | 1.2              | -                  |
| 4          | 2/13/2014     | TX    | NR         | C             | Conventional / Shale | 96.3              | 1.9                             | 0.4                             | 0.4                | 0.8               | 0.3              | <0.01              |
| 5          | 4/9/2014      | UT    | 2012       | C             | Shale                | 87.1              | 5.8                             | 1.9                             | 1.5                | 1.0               | 2.8              | -                  |
| 6          | 4/9/2014      | UT    | NR         | C             | Shale                | 90.7              | 5.1                             | 1.8                             | 1.4                | 0.9               | 0.1              | -                  |
| 7          | 11/6/2013     | WY    | NR         | C             | Conventional         | 82.7              | 10.8                            | 3.3                             | 1.6                | 0.8               | 0.8              | -                  |
| 8          | 4/7/2014      | UT    | 2004       | C             | Shale                | 90.7              | 5.1                             | 1.8                             | 1.4                | 0.9               | 0.1              | -                  |
| 9          | 1/29/2014     | TX    | 2011       | C             | Shale                | 76.3              | 14.0                            | 5.5                             | 2.9                | 1.2               | 0.0              | -                  |
| 10         | 2/6/2014      | TX    | 2011       | C             | Shale                | 70.3              | 14.8                            | 7.3                             | 4.9                | 2.0               | 0.4              | 0.40               |
| 11         | 12/4/2013     | PA    | 2012       | C             | Shale                | 97.7              | 1.9                             | 0.1                             | 0.0                | -                 | 0.3              | -                  |
| 12         | 3/25/2014     | NM    | 1990       | C             | Conventional         | 86.7              | 6.4                             | 2.7                             | 2.0                | 1.8               | 0.4              | -                  |
| 13         | 1/28/2014     | TX    | 2011       | C             | Shale                | 73.5              | 14.3                            | 6.0                             | 4.5                | 1.0               | 0.7              | -                  |
| 14         | 2/12/2014     | TX    | 2005       | C             | Tight Sands          | 96.9              | 0.3                             | 0.0                             | 0.0                | 2.2               | 0.6              | -                  |
| 15         | 2/19/2014     | KS    | 1996       | C             | Conventional         | 73.8              | 6.8                             | 4.3                             | 2.9                | 0.1               | 11.7             | -                  |
| 16         | 4/14/2014     | CO    | 1990       | C             | Shale                | 77.3              | 11.5                            | 4.5                             | 3.7                | 2.5               | 0.4              | <0.01              |
| 17         | 3/17/2014     | OK    | 1998       | C             | Conventional         | 85.3              | 7.7                             | 3.5                             | 2.8                | 0.3               | 0.4              | <0.01              |
| 18         | 2/18/2014     | KS    | 1997       | C             | Conventional         | 80.7              | 5.4                             | 3.0                             | 2.8                | 0.2               | 7.6              | -                  |
| 19         | 3/25/2014     | NM    | 1990       | C             | Conventional         | 86.1              | 6.6                             | 2.9                             | 2.3                | 1.5               | 0.5              | -                  |
| 20         | 4/1/2014      | WY    | 2009       | C             | CBM                  | 81.8              | 0.4                             | -                               | -                  | 16.9              | 0.9              | <0.01              |
| 21         | 3/24/2014     | OK    | NR         | C             | Conventional         | 90.1              | 4.4                             | 1.9                             | 1.5                | 0.1               | 1.9              | <0.01              |
| 22         | 2/14/2014     | TX    | NR         | C             | Conventional / Shale | 95.8              | 0.5                             | 0.0                             | -                  | 3.3               | 0.4              | <0.01              |
| 23         | 2/18/2014     | KS    | 1997       | C             | Conventional         | 77.2              | 5.1                             | 2.8                             | 2.6                | 0.2               | 11.7             | -                  |
| 24         | 11/6/2013     | WY    | NR         | C             | Conventional         | 81.1              | 11.8                            | 4.3                             | 2.1                | 0.6               | -                | -                  |
| 25         | 2/10/2014     | TX    | 2008       | C             | Tight Sands          | 97.5              | 0.5                             | 0.1                             | 0.3                | 1.4               | 0.2              | -                  |
| 26         | 2/19/2014     | KS    | 1996       | C             | Conventional         | 73.4              | 6.7                             | 4.3                             | 2.9                | 0.2               | 12.2             | -                  |
| 27         | 2/19/2014     | KS    | 1996       | C             | Conventional         | 75.4              | 6.4                             | 3.7                             | 2.5                | 0.1               | 11.6             | -                  |
| 28         | 2/13/2014     | TX    | NR         | C             | Conventional / Shale | 95.6              | 2.6                             | 0.5                             | 0.5                | 0.5               | 0.3              | -                  |
| 29         | 2/11/2014     | TX    | 2008       | C             | Tight Sands          | 95.4              | 1.7                             | 0.8                             | 0.8                | 1.0               | 0.4              | -                  |
| 30         | 11/6/2013     | WY    | NR         | C             | Conventional         | 82.7 <sup>†</sup> | 10.8                            | 3.5                             | 1.8                | 0.7               | 0.5              | -                  |
| 31         | 3/18/2014     | OK    | 1983       | C             | Conventional         | 90.8              | 3.8                             | 2.0                             | 2.1                | 0.3               | 1.1              | <0.01              |
| 32         | 3/24/2014     | OK    | NR         | C             | Conventional         | 77.7              | 10.3                            | 6.0                             | 4.8                | 0.4               | 0.8              | <0.01              |
| 33         | 2/19/2014     | KS    | 1996       | C             | Conventional         | 74.7              | 6.5                             | 3.8                             | 2.5                | 0.1               | 12.0             | <0.01              |
| 34         | 2/18/2014     | KS    | 1997       | C             | Conventional         | 81.0              | 5.1                             | 2.5                             | 2.4                | 0.2               | 8.6              | -                  |
| 35         | 10/25/2013    | TX    | 2008       | C/D           | Conventional         | 95.7              | 0.9                             | 0.0                             | 0.0                | 2.7               | 0.7              | <0.01              |
| 36         | 3/27/2014     | NM    | 1990       | C/D           | Shale                | 92.7              | 0.6                             | 0.1                             | 0.1                | 6.3               | 0.2              | -                  |
| 37         | 2/26/2014     | AR    | 2007       | C/D           | CBM / Conventional   | 95.2              | 1.0                             | 0.0                             | 0.0                | 3.4               | 0.3              | <0.01              |
| 38         | 2/6/2014      | AR    | 2010       | C/D           | Shale                | 93.5              | 1.1                             | 0.0                             | -                  | 5.1               | 0.2              | <0.01              |
| 39         | 2/24/2014     | AR    | NR         | C/D           | Shale                | 96.8              | 1.1                             | 0.0                             | -                  | 1.7               | 0.4              | <0.01              |
| 40         | 2/11/2014     | TX    | 2012       | C/D           | Shale                | 76.0              | 11.9                            | 6.9                             | 4.1                | 0.2               | 0.8              | -                  |
| 41         | 12/2/2013     | NY    | 2010       | C/D           | Shale                | 97.7              | 1.9                             | 0.1                             | 0.0                | 0.0               | 0.3              | -                  |
| 42         | 3/26/2014     | OK    | 2012       | C/D           | Shale                | 88.2              | 5.5                             | 2.4                             | 2.3                | 0.2               | 1.4              | -                  |
| 43         | 3/26/2014     | OK    | 2013       | C/D           | Shale                | 85.3              | 6.9                             | 3.1                             | 2.8                | 0.2               | 1.7              | -                  |

| Facility # | Sampling date | State | Year Built | Facility Type | Gas Type             | % CH <sub>4</sub> | % C <sub>2</sub> H <sub>6</sub> | % C <sub>3</sub> H <sub>8</sub> | % C <sub>4</sub> + | % CO <sub>2</sub> | % N <sub>2</sub> | % H <sub>2</sub> S |
|------------|---------------|-------|------------|---------------|----------------------|-------------------|---------------------------------|---------------------------------|--------------------|-------------------|------------------|--------------------|
| 44         | 2/26/2014     | AR    | 2010       | C/D           | Shale                | 94.7              | 1.1                             | 0.0                             | 0.0                | 3.9               | 0.3              | <0.01              |
| 45         | 4/3/2014      | NM    | 1992       | C/D           | Shale                | 79.5              | 1.2                             | 0.3                             | 0.1                | 18.9              | 0.1              | -                  |
| 46         | 12/3/2013     | PA    | 2012       | C/D           | CBM                  | 97.5              | 2.1                             | 0.1                             | 0.0                | 0.0               | 0.2              | -                  |
| 47         | 2/5/2014      | AR    | 2009       | C/D           | Shale                | 96.7              | 1.3                             | 0.0                             | -                  | 1.6               | 0.3              | <0.01              |
| 48         | 2/25/2014     | AR    | 2009       | C/D           | Shale                | 97.7              | 1.4                             | 0.0                             | -                  | 0.7               | 0.2              | <0.01              |
| 49         | 2/5/2014      | AR    | 2010       | C/D           | Shale                | 97.0              | 1.3                             | 0.0                             | -                  | 1.5               | 0.2              | <0.01              |
| 50         | 3/20/2014     | TX    | 2005       | C/D           | Shale                | 78.8              | 10.5                            | 5.2                             | 4.0                | 0.5               | 0.9              | <0.01              |
| 51         | 2/11/2014     | TX    | NR         | C/D           | Conventional         | 76.6              | 11.1                            | 7.0                             | 4.3                | 0.3               | 0.8              | -                  |
| 52         | 2/24/2014     | AR    | 2009       | C/D           | Shale                | 96.3              | 1.3                             | 0.0                             | -                  | 2.0               | 0.3              | <0.01              |
| 53         | 12/13/2013    | PA    | NR         | C/D           | Shale                | 95.8              | 2.5                             | 0.3                             | 0.3                | 0.2               | 0.8              | -                  |
| 54         | 3/28/2014     | NM    | 1993       | C/D           | Conventional / Shale | 79.3              | 0.9                             | 0.2                             | 0.1                | 19.6              | 0.1              | -                  |
| 55         | 10/24/2013    | TX    | 2003       | C/D           | CBM                  | 95.5              | 1.5                             | 0.1                             | 0.0                | 1.9               | 1.0              | <0.01              |
| 56         | 10/23/2013    | TX    | 2003       | C/D           | Shale                | 95.6              | 1.6                             | 0.1                             | 0.1                | 1.6               | 1.1              | -                  |
| 57         | 3/31/2014     | NM    | 1990       | C/D           | Shale                | 92.5              | 1.7                             | 0.4                             | 0.3                | 5.0               | 0.1              | -                  |
| 58         | 2/3/2014      | TX    | 2010       | C/D           | CBM / Conventional   | 79.3              | 11.7                            | 5.1                             | 2.8                | 0.9               | 0.1              | -                  |
| 59         | 10/25/2013    | TX    | 2008       | C/D           | Shale                | 95.7              | 0.9                             | 0.0                             | 0.0                | 2.7               | 0.7              | <0.01              |
| 60         | 4/2/2014      | WY    | 2000       | C/D           | Shale                | 92.9              | 0.0                             | -                               | -                  | 4.6               | 2.4              | <0.01              |
| 61         | 2/5/2014      | TX    | 2011       | C/D           | CBM                  | 75.9              | 13.3                            | 5.5                             | 3.8                | 1.4               | 0.1              | -                  |
| 62         | 2/3/2014      | AR    | 2006       | C/D           | Shale                | 95.1              | 1.3                             | 0.0                             | -                  | 3.4               | 0.2              | <0.01              |
| 63         | 3/25/2014     | OK    | NR         | C/D           | Shale                | 85.3              | 7.9                             | 3.4                             | 2.1                | 0.9               | 0.4              | <0.01              |
| 64         | 12/5/2013     | PA    | NR         | C/D           | Conventional         | 97.2              | 2.4                             | 0.1                             | 0.0                | 0.0               | 0.3              | -                  |
| 65         | 4/16/2014     | CO    | 2009       | C/D           | Shale                | 70.2              | 14.7                            | 7.2                             | 4.5                | 2.6               | 0.6              | -                  |
| 66         | 12/12/2013    | PA    | NR         | C/D           | Shale                | 96.4              | 2.4                             | 0.2                             | 0.2                | 0.2               | 0.5              | -                  |
| 67         | 3/27/2014     | OK    | 2008       | C/D           | Conventional         | 90.5              | 4.5                             | 1.9                             | 2.0                | 0.3               | 0.8              | -                  |
| 68         | 3/27/2014     | NM    | 1990       | C/D           | Shale                | 84.5              | 0.6                             | 0.1                             | 0.1                | 14.7              | 0.1              | -                  |
| 69         | 2/25/2014     | AR    | 2010       | C/D           | CBM / Conventional   | 97.0              | 1.4                             | 0.0                             | -                  | 1.4               | 0.2              | <0.01              |
| 70         | 3/20/2014     | OK    | 1983       | C/D           | Shale                | 83.8              | 8.9                             | 3.4                             | 2.6                | 0.5               | 0.8              | -                  |
| 71         | 4/17/2014     | CO    | 2013       | C/D           | Conventional         | 67.7              | 14.0                            | 9.1                             | 5.2                | 2.5               | 1.3              | -                  |
| 72         | 3/27/2014     | OK    | 2010       | C/D           | Shale                | 92.8              | 4.0                             | 1.5                             | 1.5                | 0.2               | -                | -                  |
| 73         | 2/27/2014     | AR    | 2008       | C/D           | Shale                | 96.1              | 1.1                             | 0.0                             | -                  | 2.5               | 0.2              | <0.01              |
| 74         | 4/1/2014      | WY    | NR         | C/D           | Shale                | 92.3              | 0.1                             | -                               | -                  | 4.4               | 3.2              | -                  |
| 75         | 10/29/2013    | WY    | 1992       | C/D           | CBM                  | 88.1              | 6.1                             | 2.7                             | 2.0                | 0.6               | 0.5              | -                  |
| 76         | 2/7/2014      | AR    | 2011       | C/D           | Conventional         | 96.6              | 1.2                             | 0.0                             | -                  | 1.7               | 0.4              | <0.01              |
| 77         | 2/12/2014     | TX    | 2008       | C/D           | Shale                | 97.5              | 0.2                             | 0.0                             | 0.1                | 1.7               | 0.5              | -                  |
| 78         | 3/19/2014     | OK    | 1986       | C/D           | Tight Sands          | 87.3              | 5.4                             | 2.2                             | 2.4                | 0.8               | 1.8              | <0.01              |
| 79         | 3/18/2014     | OK    | 2006       | C/D           | Conventional         | 95.5              | 2.4                             | 0.6                             | 0.4                | 0.7               | 0.4              | <0.01              |
| 80         | 2/14/2014     | TX    | 2004       | C/D           | Tight Sands          | 97.7              | 0.4                             | 0.0                             | 0.1                | 1.4               | 0.4              | -                  |
| 81         | 11/7/2013     | WY    | 1958       | C/D           | Conventional         | 88.1              | 6.3                             | 2.6                             | 1.7                | 0.6               | 0.7              | -                  |
| 82         | 4/2/2014      | WY    | 2011       | C/D           | Conventional         | 70.0              | 13.3                            | 7.9                             | 6.6                | 1.5               | 0.6              | <0.01              |
| 83         | 10/22/2013    | TX    | 2008       | C/D           | Shale                | 94.9              | 2.6                             | 0.2                             | 0.3                | 1.5               | 0.7              | -                  |
| 84         | 2/14/2014     | TX    | 1996       | C/D           | Tight Sands          | 96.5              | 1.1                             | 0.2                             | 0.4                | 1.5               | 0.3              | -                  |
| 85         | 3/28/2014     | NM    | 1990       | C/D           | CBM                  | 76.7              | 1.7                             | 0.6                             | 0.4                | 20.6              | 0.1              | -                  |
| 86         | 3/19/2014     | OK    | 2005       | C/D           | Conventional         | 85.3              | 7.4                             | 3.2                             | 2.4                | 0.8               | 0.9              | <0.01              |
| 87         | 1/27/2014     | TX    | 2011       | C/D           | Shale                | 64.7              | 18.4                            | 10.0                            | 5.8                | 1.1               | 0.1              | -                  |
| 88         | 12/11/2013    | PA    | NR         | C/D           | Conventional         | 95.2              | 3.2                             | 0.5                             | 0.3                | 0.1               | 0.6              | -                  |
| 89         | 3/24/2014     | NM    | 1994       | C/D           | CBM                  | 83.9              | 0.6                             | 0.1                             | 0.0                | 15.4              | 0.1              | -                  |
| 90         | 12/11/2013    | PA    | NR         | C/D           | Shale                | 97.0              | 2.2                             | 0.1                             | -                  | 0.4               | 0.2              | -                  |
| 91         | 10/22/2013    | TX    | 2007       | C/D           | Shale                | 95.9              | 1.9                             | 0.1                             | 0.1                | 1.5               | 0.6              | -                  |
| 92         | 12/16/2013    | WV    | 2010       | C/D           | Shale                | 74.0              | 16.3                            | 5.8                             | 3.4                | 0.2               | 0.4              | -                  |
| 93         | 11/5/2013     | WY    | NR         | C/D           | Conventional         | 83.8              | 7.6                             | 3.3                             | 2.2                | 3.0               | 0.2              | -                  |
| 94         | 2/3/2014      | TX    | 2011       | C/D           | Shale                | 75.9              | 13.2                            | 5.7                             | 3.7                | 1.3               | 0.2              | -                  |
| 95         | 2/26/2014     | AR    | 2009       | C/D           | Shale                | 95.8              | 1.0                             | 0.0                             | -                  | 2.7               | 0.5              | <0.01              |
| 96         | 2/10/2014     | TX    | 2007       | C/D           | Tight Sands          | 97.9              | 0.4                             | 0.0                             | 0.1                | 1.5               | 0.2              | -                  |
| 97         | 12/9/2013     | PA    | NR         | C/D           | Conventional         | 92.5              | 3.5                             | 0.5                             | 0.3                | 0.1               | 3.2              | -                  |
| 98         | 4/16/2014     | CO    | 2011       | C/D           | Shale                | 67.5              | 13.9                            | 8.1                             | 6.9                | 2.5               | 1.0              | -                  |
| 99         | 12/17/2013    | WV    | 2010       | C/D           | Shale                | 77.0              | 15.1                            | 4.9                             | 2.4                | 0.1               | 0.5              | -                  |



| Facility # | Sampling date | State | Year Built | Facility Type | Gas Type           | % CH <sub>4</sub> | % C <sub>2</sub> H <sub>6</sub> | % C <sub>3</sub> H <sub>8</sub> | % C <sub>4</sub> + | % CO <sub>2</sub> | % N <sub>2</sub> | % H <sub>2</sub> S |
|------------|---------------|-------|------------|---------------|--------------------|-------------------|---------------------------------|---------------------------------|--------------------|-------------------|------------------|--------------------|
| 100        | 3/17/2014     | OK    | 2007       | C/D           | Conventional       | 84.3              | 4.9                             | 3.2                             | 2.7                | 0.1               | 4.9              | <0.01              |
| 101        | 3/21/2014     | OK    | 1983       | C/D           | Shale              | 93.4              | 3.3                             | 1.1                             | 0.8                | 1.0               | 0.3              | <0.01              |
| 102        | 2/4/2014      | TX    | 2011       | C/D/T         | Shale              | 76.5              | 13.2                            | 5.7                             | 3.2                | 1.1               | 0.2              | 0.06               |
| 103        | 1/27/2014     | TX    | 2010       | C/D/T         | Shale              | 74.2              | 14.4                            | 6.3                             | 4.1                | 1.0               | 0.1              | <0.01              |
| 104        | 2/12/2014     | TX    | 2013       | C/D/T         | Shale              | 76.3 <sup>†</sup> | 11.5                            | 7.0                             | 4.2                | 0.2               | 0.8              | -                  |
| 105        | 4/7/2014      | UT    | 2012       | C/D/T         | Shale              | 89.8 <sup>†</sup> | 5.3                             | 1.8                             | 1.4                | 0.9               | 0.8              | -                  |
| 106        | 4/9/2014      | UT    | NR         | C/D/T         | Shale              | 89.8 <sup>†</sup> | 5.3                             | 1.8                             | 1.4                | 0.9               | 0.8              | -                  |
| 107        | 1/28/2014     | TX    | 2011       | C/D/T         | Conventional       | 74.2 <sup>†</sup> | 14.4                            | 6.3                             | 4.1                | 1.0               | 0.1              | -                  |
| 108        | 1/28/2014     | TX    | 2012       | C/D/T         | Shale              | 74.2              | 14.4                            | 6.3                             | 4.1                | 1.0               | 0.1              | -                  |
| 109        | 1/31/2014     | TX    | 2009       | C/D/T         | Shale              | 72.7              | 14.9                            | 6.8                             | 3.3                | 1.8               | 0.6              | NR                 |
| 110        | 11/5/2013     | WY    | NR         | D             | Conventional       | 80.7              | 8.7                             | 4.3                             | 3.4                | 2.8               | 0.2              | -                  |
| 111        | 12/6/2013     | PA    | NR         | D             | Shale              | 97.3              | 2.3                             | 0.1                             | 0.0                | 0.0               | 0.3              | -                  |
| 112        | 12/17/2013    | WV    | 2010       | D             | Shale              | 76.1              | 15.9                            | 5.1                             | 2.0                | 0.0               | 0.5              | -                  |
| 113        | 12/10/2013    | PA    | 2011       | D             | Shale              | 97.9              | 1.4                             | 0.1                             | -                  | 0.4               | 0.2              | -                  |
| 114        | 12/4/2013     | PA    | NR         | D             | Shale              | 97.4              | 2.2                             | 0.1                             | 0.0                | 0.0               | 0.3              | -                  |
| 115        | 3/26/2014     | NM    | 1990       | D/T           | CBM                | 88.4              | 0.9                             | 0.2                             | 0.1                | 9.4               | 0.9              | -                  |
| 116        | 4/11/2014     | CO    | NR         | P             | Shale              | 89.3              | 5.1                             | 1.3                             | 1.0                | 3.1               | 0.1              | -                  |
| 117        | 2/20/2014     | LA    | 1997       | P             | Offshore           | 86.5              | 6.3                             | 4.0                             | 2.8                | 0.7               | 0.3              | -                  |
| 118        | 11/8/2013     | WY    | 1958       | P             | Conventional       | 87.5              | 7.4                             | 2.4                             | 1.4                | 0.8               | 0.6              | -                  |
| 119        | 4/1/2014      | CO    | 1954       | P             | CBM / Conventional | 89.5              | 3.6                             | 1.5                             | 1.1                | 4.1               | 0.2              | -                  |
| 120        | 4/2/2014      | NM    | 1948       | P             | Conventional       | 87.1              | 6.7                             | 2.5                             | 1.7                | 1.6               | 0.3              | -                  |
| 121        | 3/31/2014     | WY    | 1950       | P             | Conventional       | 61.9              | 15.0                            | 10.9                            | 9.4                | 1.5               | 1.3              | <0.01              |
| 122        | 4/15/2014     | CO    | 1974       | P             | Shale              | 75.5              | 13.3                            | 5.7                             | 2.6                | 2.5               | 0.4              | -                  |
| 123        | 3/20/2014     | CO    | 2009       | P             | Shale              | 69.0              | 14.4                            | 6.1                             | -                  | 2.6               | 0.2              | -                  |
| 124        | 10/30/2013    | WY    | 1986       | P             | Conventional       | 88.1 <sup>†</sup> | 6.1                             | 2.7                             | 2.0                | 0.6               | 0.5              | -                  |
| 125        | 12/18/2013    | WV    | 2013       | P             | Shale              | 80.6              | 13.0                            | 3.9                             | 2.0                | 0.2               | 0.4              | -                  |
| 126        | 11/4/2013     | WY    | 1993       | P             | Conventional       | 83.2              | 7.9                             | 3.4                             | 2.2                | 3.0               | 0.2              | -                  |
| 127        | 4/10/2014     | CO    | NR         | P             | Shale              | 90.8              | 5.5                             | 1.4                             | 1.2                | 1.0               | 0.1              | -                  |
| 128        | 2/17/2014     | TX    | 2001       | P             | Offshore / Shale   | 84.5              | 8.5                             | 3.5                             | 2.2                | 0.9               | 0.2              | -                  |
| 129        | 2/21/2014     | AL    | 1999       | P             | Offshore / Shale   | 91.1              | 4.3                             | 2.0                             | 1.5                | 0.9               | 0.2              | -                  |
| 130        | 1/30/2014     | TX    | 2013       | P             | Shale              | 75.7              | 13.3                            | 5.8                             | 4.1                | 1.1               | 0.1              | -                  |
| 131        | 4/3/2014      | WY    | 1982       | P             | Conventional       | 58.9              | 12.1                            | 13.9                            | 12.6               | 1.0               | 1.4              | <0.01              |

<sup>†</sup>Gas composition data were unavailable. Mol% values were estimated from one or more proximal study G&P facilities.

**Table S2.** Facility throughput (2012 and 2013 average, and day of sampling), facility capacity, inlet and outlet pressures, number of dehydration units (of any type), and total number of gas pneumatics (sum of all low, high, and continuous bleed counted). Air indicates compressed air used by pneumatic devices. Natural gas capacity data were, in some cases, approximated by company representative and may not be accurate. NR indicates not recorded, usually because the value was unknown. (t/hr = tonnes per hour<sup>1</sup>)

| Facility # | Facility Type | Facility natural gas throughput (t/hr, 2012 average) | Facility natural gas throughput (t/hr, 2013 average) | Facility natural gas throughput (t/hr, day of sampling) | Facility natural gas capacity (t/hr) | Inlet Pressure (kPa) | Outlet Pressure (kPa) | # Dehydrat ion Units | # Gas pneumatics |
|------------|---------------|------------------------------------------------------|------------------------------------------------------|---------------------------------------------------------|--------------------------------------|----------------------|-----------------------|----------------------|------------------|
| 1          | C             | 24.1                                                 | 19.0                                                 | 29.7                                                    | 48.2                                 | 390                  | 7,160                 | 1                    | 70               |
| 2          | C             | 19.7                                                 | 17.3                                                 | 16.1                                                    | 24.1                                 | 460                  | 2,520                 | -                    | Air              |
| 3          | C             | 0.2                                                  | 0.2                                                  | 0.5                                                     | NR                                   | 570                  | 4,100                 | -                    | 8                |
| 4          | C             | 5.6                                                  | 7.1                                                  | -                                                       | NR                                   | 470                  | 6,130                 | -                    | 13               |
| 5          | C             | 23.9                                                 | NR                                                   | 16.1                                                    | 24.1                                 | 460                  | 2,940                 | -                    | 8                |
| 6          | C             | 23.4                                                 | 24.9                                                 | 28.9                                                    | 32.1                                 | 490                  | 2,810                 | -                    | Air              |
| 7          | C             | NR                                                   | 4.9                                                  | 5.1                                                     | NR                                   | 1,230                | 4,510                 | -                    | 4                |
| 8          | C             | 17.1                                                 | NR                                                   | 5.1                                                     | 22.5                                 | 460                  | 2,470                 | -                    | Air              |
| 9          | C             | 8.9                                                  | 13.1                                                 | 8.4                                                     | NR                                   | 280                  | 6,580                 | -                    | 38               |
| 10         | C             | 9.6                                                  | 8.0                                                  | 11.8                                                    | 18.5                                 | 590                  | 3,340                 | -                    | 40               |
| 11         | C             | 350.8                                                | 436.4                                                | 487.1                                                   | 601.9                                | 6,590                | 9,500                 | -                    | Air              |
| 12         | C             | 51.0                                                 | 48.3                                                 | 47.3                                                    | NR                                   | 1,430                | 2,790                 | -                    | 1                |
| 13         | C             | 9.2                                                  | NR                                                   | 5.1                                                     | 14.4                                 | 290                  | 6,680                 | -                    | 22               |
| 14         | C             | 4.0                                                  | 3.3                                                  | 0.2                                                     | NR                                   | 300                  | 5,720                 | 1                    | 18               |
| 15         | C             | 2.6                                                  | 2.5                                                  | 2.2                                                     | 5.6                                  | 60                   | 440                   | -                    | 1                |
| 16         | C             | 15.0                                                 | 8.3                                                  | 16.2                                                    | 20.1                                 | 460                  | 1,520                 | -                    | Air              |
| 17         | C             | 2.8                                                  | 2.4                                                  | 4.9                                                     | 4.8                                  | 310                  | 3,070                 | -                    | 2                |
| 18         | C             | 2.6                                                  | 2.4                                                  | 2.6                                                     | 4.8                                  | 110                  | 1,540                 | -                    | 7                |
| 19         | C             | 2.1                                                  | 1.8                                                  | 1.6                                                     | NR                                   | 370                  | 1,680                 | -                    | 7                |
| 20         | C             | 2.8                                                  | 2.6                                                  | 1.8                                                     | NR                                   | 110                  | 570                   | -                    | 1                |
| 21         | C             | 0.4                                                  | 0.3                                                  | 0.6                                                     | 0.8                                  | 280                  | 3,350                 | -                    | 6                |
| 22         | C             | 1.2                                                  | 1.4                                                  | 0.5                                                     | NR                                   | 770                  | 3,390                 | -                    | 8                |
| 23         | C             | 2.8                                                  | 2.6                                                  | 2.2                                                     | 6.4                                  | 180                  | 1,650                 | -                    | 3                |
| 24         | C             | NR                                                   | 4.8                                                  | 5.5                                                     | NR                                   | 1,260                | 4,580                 | -                    | 4                |
| 25         | C             | 0.3                                                  | 0.2                                                  | 0.3                                                     | NR                                   | 690                  | 6,990                 | -                    | 4                |
| 26         | C             | 3.2                                                  | 3.1                                                  | 3.0                                                     | 4.0                                  | 60                   | 590                   | -                    | -                |
| 27         | C             | 4.2                                                  | 4.1                                                  | 3.6                                                     | 6.4                                  | 50                   | 390                   | -                    | -                |
| 28         | C             | 0.8                                                  | 1.0                                                  | -                                                       | NR                                   | 580                  | -                     | -                    | 8                |
| 29         | C             | 0.6                                                  | 0.5                                                  | 0.5                                                     | NR                                   | 810                  | 5,630                 | -                    | 10               |
| 30         | C             | NR                                                   | 53.0                                                 | 52.1                                                    | NR                                   | 880                  | 2,500                 | -                    | Air              |
| 31         | C             | 0.8                                                  | 0.7                                                  | 0.8                                                     | NR                                   | 240                  | 590                   | -                    | 15               |
| 32         | C             | 0.2                                                  | 0.2                                                  | -                                                       | 0.8                                  | 230                  | 230                   | -                    | 5                |
| 33         | C             | 1.0                                                  | 1.0                                                  | 1.0                                                     | 2.0                                  | 60                   | 460                   | -                    | -                |
| 34         | C             | 1.2                                                  | 1.3                                                  | 1.3                                                     | 2.0                                  | 30                   | 370                   | -                    | 1                |
| 35         | C/D           | 12.0                                                 | 10.8                                                 | 7.7                                                     | 8.0                                  | 680                  | 4,980                 | 1                    | -                |
| 36         | C/D           | 10.3                                                 | 10.1                                                 | 34.1                                                    | 57.8                                 | 720                  | 6,300                 | 5                    | -                |
| 37         | C/D           | 12.8                                                 | 10.4                                                 | 25.7                                                    | 32.1                                 | 350                  | 7,680                 | 2                    | -                |
| 38         | C/D           | 25.7                                                 | 23.3                                                 | 20.9                                                    | 27.3                                 | 300                  | 6,560                 | 2                    | 38               |
| 39         | C/D           | 55.9                                                 | 50.9                                                 | 52.2                                                    | 57.8                                 | 350                  | 8,030                 | 3                    | -                |
| 40         | C/D           | 6.9                                                  | 10.7                                                 | 10.5                                                    | NR                                   | 320                  | 6,930                 | 1                    | 13               |
| 41         | C/D           | NR                                                   | NR                                                   | 165.3                                                   | 184.6                                | 6,990                | 6,520                 | 3                    | Air              |
| 42         | C/D           | 16.1                                                 | 20.1                                                 | 28.1                                                    | NR                                   | 300                  | 7,540                 | 1                    | 29               |
| 43         | C/D           | 9.6                                                  | 8.0                                                  | 22.5                                                    | NR                                   | 230                  | 7,130                 | 1                    | 29               |
| 44         | C/D           | 32.1                                                 | 26.5                                                 | 35.3                                                    | 38.5                                 | 350                  | 7,680                 | 2                    | -                |
| 45         | C/D           | 7.0                                                  | 6.4                                                  | 18.9                                                    | NR                                   | 1,490                | 6,690                 | 1                    | -                |

| Facility # | Facility Type | Facility natural gas throughput (t/hr, 2012 average) | Facility natural gas throughput (t/hr, 2013 average) | Facility natural gas throughput (t/hr, day of sampling) | Facility natural gas capacity (t/hr) | Inlet Pressure (kPa) | Outlet Pressure (kPa) | # Dehydrat ion Units | # Gas pneumatics |
|------------|---------------|------------------------------------------------------|------------------------------------------------------|---------------------------------------------------------|--------------------------------------|----------------------|-----------------------|----------------------|------------------|
| 46         | C/D           | 120.4                                                | 135.6                                                | 233.9                                                   | 296.1                                | 7,360                | 7,400                 | 3                    | 3                |
| 47         | C/D           | 34.8                                                 | 32.5                                                 | 30.1                                                    | 32.1                                 | 420                  | 8,010                 | 1                    | 38               |
| 48         | C/D           | 23.8                                                 | 17.7                                                 | 37.7                                                    | 44.9                                 | 330                  | 7,750                 | 2                    | -                |
| 49         | C/D           | 51.4                                                 | 44.1                                                 | 23.8                                                    | 32.1                                 | 320                  | 7,580                 | 3                    | 43               |
| 50         | C/D           | 13.6                                                 | 12.4                                                 | 22.5                                                    | 24.1                                 | 500                  | 3,200                 | 1                    | 33               |
| 51         | C/D           | 11.4                                                 | 9.2                                                  | 8.0                                                     | 28.1                                 | 290                  | 6,990                 | 2                    | 14               |
| 52         | C/D           | 25.7                                                 | 24.1                                                 | 24.1                                                    | 24.1                                 | 410                  | 8,370                 | 1                    | -                |
| 53         | C/D           | 8.5                                                  | 8.4                                                  | 8.0                                                     | NR                                   | 280                  | 5,610                 | 1                    | 19               |
| 54         | C/D           | 4.1                                                  | 3.4                                                  | 18.0                                                    | 24.1                                 | 740                  | 6,400                 | 2                    | 23               |
| 55         | C/D           | 52.2                                                 | 50.6                                                 | 48.4                                                    | NR                                   | 770                  | 5,960                 | 1                    | 49               |
| 56         | C/D           | 20.1                                                 | 20.9                                                 | 17.7                                                    | NR                                   | 540                  | 6,230                 | 2                    | 10               |
| 57         | C/D           | 33.7                                                 | 38.9                                                 | 38.2                                                    | 40.1                                 | 1,470                | 1,800                 | 2                    | -                |
| 58         | C/D           | 9.6                                                  | 9.6                                                  | 18.9                                                    | 26.5                                 | 3,060                | 7,120                 | 2                    | 26               |
| 59         | C/D           | 12.0                                                 | 10.8                                                 | 7.7                                                     | 8.0                                  | 680                  | 4,980                 | 1                    | -                |
| 60         | C/D           | 5.0                                                  | 3.8                                                  | 3.2                                                     | NR                                   | 480                  | 7,680                 | 1                    | 5                |
| 61         | C/D           | 7.2                                                  | 7.2                                                  | 7.5                                                     | 14.0                                 | 660                  | 6,820                 | 1                    | 33               |
| 62         | C/D           | 22.0                                                 | 21.2                                                 | 23.3                                                    | 24.1                                 | 450                  | 6,850                 | 1                    | 24               |
| 63         | C/D           | 0.4                                                  | 0.3                                                  | 0.3                                                     | 0.8                                  | 920                  | 6,520                 | 1                    | 10               |
| 64         | C/D           | 240.8                                                | 256.8                                                | 410.1                                                   | 505.6                                | 6,570                | 7,600                 | 5                    | Air              |
| 65         | C/D           | 10.1                                                 | 23.0                                                 | 30.5                                                    | 32.1                                 | 1,060                | 7,690                 | 1                    | Air              |
| 66         | C/D           | 5.0                                                  | 8.0                                                  | 7.3                                                     | NR                                   | 280                  | 5,050                 | 1                    | 25               |
| 67         | C/D           | 3.2                                                  | 1.8                                                  | 1.8                                                     | NR                                   | 230                  | 6,820                 | 1                    | 18               |
| 68         | C/D           | 6.1                                                  | 5.3                                                  | 13.3                                                    | 19.3                                 | 680                  | 6,300                 | 4                    | -                |
| 69         | C/D           | 19.3                                                 | 13.6                                                 | 14.4                                                    | 19.3                                 | 330                  | 6,990                 | 1                    | -                |
| 70         | C/D           | 9.6                                                  | 11.2                                                 | 12.4                                                    | 16.1                                 | 540                  | 2,990                 | 1                    | 15               |
| 71         | C/D           | NR                                                   | 1.0                                                  | 7.1                                                     | 16.1                                 | 390                  | 7,320                 | 1                    | Air              |
| 72         | C/D           | 8.8                                                  | 7.2                                                  | 4.2                                                     | NR                                   | 360                  | 7,150                 | 1                    | 25               |
| 73         | C/D           | 9.1                                                  | 10.8                                                 | 8.8                                                     | 8.8                                  | 430                  | 7,160                 | 1                    | 21               |
| 74         | C/D           | 4.6                                                  | 4.6                                                  | 2.4                                                     | 12.8                                 | 460                  | 8,720                 | 1                    | 5                |
| 75         | C/D           | 10.0                                                 | 9.1                                                  | 8.0                                                     | 10.4                                 | 290                  | 7,270                 | 1                    | 32               |
| 76         | C/D           | 32.1                                                 | 22.3                                                 | 22.6                                                    | 27.3                                 | 340                  | 6,620                 | 1                    | 28               |
| 77         | C/D           | 2.0                                                  | 1.8                                                  | 2.9                                                     | NR                                   | 1,610                | 4,420                 | 1                    | 18               |
| 78         | C/D           | 0.4                                                  | 0.3                                                  | 0.2                                                     | 0.8                                  | 300                  | 7,340                 | 1                    | 15               |
| 79         | C/D           | 4.0                                                  | 4.0                                                  | 4.6                                                     | 5.6                                  | 570                  | 3,780                 | 1                    | 26               |
| 80         | C/D           | 0.9                                                  | 0.8                                                  | 0.6                                                     | 1.6                                  | 410                  | 6,160                 | 1                    | 7                |
| 81         | C/D           | NR                                                   | 89.9                                                 | 30.3                                                    | NR                                   | 450                  | 4,430                 | 1                    | Air              |
| 82         | C/D           | 3.5                                                  | 8.1                                                  | 4.8                                                     | 5.6                                  | 110                  | 3,540                 | 1                    | 11               |
| 83         | C/D           | 44.1                                                 | 41.7                                                 | 40.6                                                    | NR                                   | 1,080                | 6,310                 | 2                    | Air              |
| 84         | C/D           | 2.2                                                  | 2.0                                                  | 2.3                                                     | 3.0                                  | 630                  | 6,650                 | 1                    | 21               |
| 85         | C/D           | 5.6                                                  | 5.4                                                  | 5.2                                                     | 10.4                                 | 640                  | 2,380                 | 2                    | -                |
| 86         | C/D           | 1.2                                                  | 4.1                                                  | 3.6                                                     | 5.6                                  | 1,130                | 6,650                 | 1                    | 31               |
| 87         | C/D           | 1.6                                                  | 4.4                                                  | 8.0                                                     | 10.4                                 | 370                  | 6,600                 | 2                    | 21               |
| 88         | C/D           | 7.2                                                  | 4.5                                                  | 4.3                                                     | NR                                   | 330                  | 5,960                 | 1                    | 15               |
| 89         | C/D           | 12.5                                                 | 11.5                                                 | 9.5                                                     | 16.9                                 | 910                  | 6,270                 | 4                    | 43               |
| 90         | C/D           | 48.8                                                 | 78.6                                                 | 96.3                                                    | NR                                   | 1,130                | 6,300                 | 2                    | Air              |
| 91         | C/D           | 12.0                                                 | 12.4                                                 | 12.4                                                    | NR                                   | 1,100                | 5,960                 | 1                    | 9                |
| 92         | C/D           | NR                                                   | 8.7                                                  | 0.4                                                     | 4.0                                  | 6,660                | 6,660                 | 1                    | 3                |
| 93         | C/D           | 101.1                                                | 101.1                                                | 108.3                                                   | NR                                   | 1,820                | 6,650                 | 1                    | -                |
| 94         | C/D           | 0.1                                                  | 0.1                                                  | 0.014                                                   | 0.5                                  | 540                  | 7,680                 | 1                    | 17               |
| 95         | C/D           | 25.7                                                 | 21.7                                                 | 27.3                                                    | 25.7                                 | 460                  | 7,680                 | 2                    | -                |
| 96         | C/D           | 0.3                                                  | 0.2                                                  | 0.2                                                     | NR                                   | 370                  | 3,200                 | 1                    | 8                |
| 97         | C/D           | 0.2                                                  | 0.1                                                  | 0.1                                                     | NR                                   | 510                  | 2,850                 | 1                    | -                |
| 98         | C/D           | 1.1                                                  | 1.0                                                  | 0.8                                                     | 2.8                                  | 190                  | 1,270                 | 1                    | Air              |
| 99         | C/D           | NR                                                   | 1.4                                                  | 0.6                                                     | 4.0                                  | 6,270                | 6,270                 | 1                    | 8                |

| Facility # | Facility Type | Facility natural gas throughput (t/hr, 2012 average) | Facility natural gas throughput (t/hr, 2013 average) | Facility natural gas throughput (t/hr, day of sampling) | Facility natural gas capacity (t/hr) | Inlet Pressure (kPa) | Outlet Pressure (kPa) | # Dehydrat ion Units | # Gas pneumatics |
|------------|---------------|------------------------------------------------------|------------------------------------------------------|---------------------------------------------------------|--------------------------------------|----------------------|-----------------------|----------------------|------------------|
| 100        | C/D           | 0.1                                                  | 0.1                                                  | -                                                       | 0.0                                  | 2,990                | -                     | 1                    | 2                |
| 101        | C/D           | 0.2                                                  | 0.2                                                  | -                                                       | NR                                   | 200                  | -                     | 1                    | 15               |
| 102        | C/D/T         | 16.1                                                 | 12.8                                                 | 48.2                                                    | NR                                   | 5,020                | 6,990                 | 1                    | Air              |
| 103        | C/D/T         | 95.3                                                 | NR                                                   | 321.0                                                   | NR                                   | 4,920                | 6,990                 | 5                    | Air              |
| 104        | C/D/T         | NR                                                   | 4.8                                                  | 15.2                                                    | 20.1                                 | 640                  | 7,560                 | 1                    | 5                |
| 105        | C/D/T         | 65.1                                                 | 66.7                                                 | 68.0                                                    | 80.3                                 | 1,250                | 6,710                 | 2                    | Air              |
| 106        | C/D/T         | 54.5                                                 | 51.6                                                 | 50.1                                                    | 184.6                                | 1,200                | 6,570                 | 2                    | Air              |
| 107        | C/D/T         | 9.7                                                  | 17.1                                                 | 8.8                                                     | NR                                   | 300                  | 7,210                 | 1                    | 14               |
| 108        | C/D/T         | 9.7                                                  | 17.1                                                 | 9.6                                                     | 12.0                                 | 330                  | 6,990                 | 1                    | 27               |
| 109        | C/D/T         | 1.6                                                  | 1.2                                                  | 1.1                                                     | 1.6                                  | 440                  | 2,160                 | 1                    | 1                |
| 110        | D             | 4.5                                                  | 4.3                                                  | 6.8                                                     | NR                                   | 2,580                | 2,580                 | 1                    | 6                |
| 111        | D             | 80.3                                                 | 85.9                                                 | 3.3                                                     | 168.5                                | 7,720                | 7,720                 | 3                    | 16               |
| 112        | D             | NR                                                   | 2.6                                                  | 0.5                                                     | 4.0                                  | 6,300                | 6,300                 | 1                    | 2                |
| 113        | D             | 9.6                                                  | 5.6                                                  | 4.0                                                     | 8.0                                  | 4,370                | 4,370                 | 1                    | 19               |
| 114        | D             | NR                                                   | 6.8                                                  | NR                                                      | NR                                   | 5,610                | 5,610                 | 2                    | 21               |
| 115        | D/T           | 382.0                                                | 325.8                                                | 256.8                                                   | 521.6                                | 6,300                | 6,160                 | 5                    | Air              |
| 116        | P             | 599.5                                                | 521.6                                                | 503.2                                                   | 722.3                                | 5,250                | 8,450                 | 5                    | Air              |
| 117        | P             | 227.9                                                | 186.2                                                | 158.1                                                   | 481.5                                | 5,140                | 5,460                 | 1                    | Air              |
| 118        | P             | NR                                                   | 1020.0                                               | 780.4                                                   | 1,163.6                              | 2,030                | 5,010                 | 1                    | Air              |
| 119        | P             | 363.5                                                | 341.9                                                | 344.3                                                   | NR                                   | 2,320                | 5,540                 | 2                    | -                |
| 120        | P             | 127.1                                                | 119.1                                                | 109.1                                                   | 172.5                                | 3,960                | 3,220                 | 1                    | Air              |
| 121        | P             | 22.1                                                 | 25.9                                                 | 33.6                                                    | 40.1                                 | 120                  | 7,080                 | 1                    | Air              |
| 122        | P             | 60.6                                                 | 70.6                                                 | 164.5                                                   | 353.1                                | 3,340                | 5,440                 | 1                    | 8                |
| 123        | P             | 128.4                                                | NR                                                   | 124.4                                                   | 128.4                                | 750                  | 5,540                 | 1                    | Air              |
| 124        | P             | 120.6                                                | 99.3                                                 | 164.5                                                   | 164.5                                | 2,160                | 5,960                 | 1                    | Air              |
| 125        | P             | 190.2                                                | 172.5                                                | 270.4                                                   | 417.3                                | 6,780                | 6,360                 | 9                    | Air              |
| 126        | P             | 468.7                                                | 435.0                                                | 492.7                                                   | 573.8                                | 700                  | 4,690                 | -                    | Air              |
| 127        | P             | 368.3                                                | 370.8                                                | 389.2                                                   | 361.1                                | 7,560                | 8,340                 | -                    | Air              |
| 128        | P             | NR                                                   | NR                                                   | 213.5                                                   | 401.3                                | 6,320                | 4,510                 | 1                    | Air              |
| 129        | P             | 256.8                                                | 212.7                                                | 168.8                                                   | 481.5                                | 6,870                | 6,650                 | 1                    | 7                |
| 130        | P             | NR                                                   | NR                                                   | 154.9                                                   | 160.5                                | 6,820                | 7,030                 | 2                    | Air              |
| 131        | P             | 1.4                                                  | 1.3                                                  | 1.6                                                     | 2.4                                  | 110                  | 2,580                 | 1                    | -                |

<sup>1</sup> based on 19.26 grams per standard cubic foot CH<sub>4</sub> at 15.6°C and 1 atmosphere<sup>4</sup>

**Table S3.** Total and operating horsepower of gas powered reciprocating engines and turbines; census of operating (OP), non-operating pressurized (NOP), and non-operating depressurized (NOD) compressors. Notes on primary driver(s) include engine characteristics (lean and rich burn, two stroke (2-S), and four stroke (4-S)), turbine type, and electric motor. The number of each driver type and operating status are given in parenthesis when noted by onsite observer. NR indicates not recorded, usually because the value or information was unknown.

| Facility # | Facility Type | Engine HP (total) | Engine HP (OP) | Turbine HP (total) | Turbine HP (OP) | # Recip compressors (OP - NOP - NOD) | # Cent compressors (OP - NOP - NOD) | Notes on primary driver(s)          |
|------------|---------------|-------------------|----------------|--------------------|-----------------|--------------------------------------|-------------------------------------|-------------------------------------|
| 1          | C             | 13,800            | 6,900          | -                  | -               | 5 - 2 - 3                            | 0 - 0 - 0                           | 4-S ultra lean burn                 |
| 2          | C             | 4,305             | 3,040          | -                  | -               | 2 - 1 - 0                            | 0 - 0 - 0                           | 4-S lean burn                       |
| 3          | C             | 145               | 145            | -                  | -               | 1 - 0 - 0                            | 0 - 0 - 0                           | 4-S lean burn                       |
| 4          | C             | 3,600             | 2,400          | -                  | -               | 2 - 0 - 1                            | 0 - 0 - 0                           | 4-S lean burn                       |
| 5          | C             | 5,060             | 3,795          | -                  | -               | 3 - 0 - 1                            | 0 - 0 - 0                           | 4-S lean burn                       |
| 6          | C             | 6,195             | 6,195          | -                  | -               | 4 - 0 - 0                            | 0 - 0 - 0                           | 4-S lean burn                       |
| 7          | C             | 1,480             | 1,480          | -                  | -               | 1 - 0 - 0                            | 0 - 0 - 0                           | 4-S lean burn                       |
| 8          | C             | 3,795             | 3,795          | -                  | -               | 3 - 0 - 0                            | 0 - 0 - 0                           | 4-S lean burn                       |
| 9          | C             | 4,800             | 3,600          | -                  | -               | 3 - 0 - 1                            | 0 - 0 - 0                           | 4-S lean burn                       |
| 10         | C             | 4,110             | 4,110          | -                  | -               | 3 - 0 - 0                            | 0 - 0 - 0                           | 4-S lean burn                       |
| 11         | C             | 4,155             | -              | 15,400             | 15,400          | 0 - 3 - 0                            | 2 - 0 - 0                           | 4-S lean burn (3); Solar Taurus (2) |
| 12         | C             | -                 | -              | 5,840              | 4,500           | 0 - 0 - 0                            | 2 - 0 - 1                           | Solar turbines                      |
| 13         | C             | 4,800             | 2,400          | -                  | -               | 2 - 0 - 2                            | 0 - 0 - 0                           | 4-S lean burn                       |
| 14         | C             | 1,875             | 1,875          | -                  | -               | 1 - 0 - 0                            | 0 - 0 - 0                           | 4-S lean burn                       |
| 15         | C             | 2,400             | 2,400          | -                  | -               | 2 - 0 - 0                            | 0 - 0 - 0                           | 4-S rich burn                       |
| 16         | C             | 2,400             | 2,400          | -                  | -               | 2 - 0 - 0                            | 0 - 0 - 0                           | 4-S lean burn                       |
| 17         | C             | 1,350             | 1,350          | -                  | -               | 1 - 0 - 0                            | 0 - 0 - 0                           | 4-S lean burn                       |
| 18         | C             | 1,200             | 1,200          | -                  | -               | 1 - 0 - 0                            | 0 - 0 - 0                           | 4-S lean burn                       |
| 19         | C             | 716               | 716            | -                  | -               | 1 - 0 - 0                            | 0 - 0 - 0                           | 4-S lean burn                       |
| 20         | C             | 1,637             | 1,000          | -                  | -               | 1 - 0 - 1                            | 0 - 0 - 0                           | 4-S lean burn                       |
| 21         | C             | NR                | NR             | -                  | -               | 1 - 0 - 0                            | 0 - 0 - 0                           | 2-S engine                          |
| 22         | C             | 180               | 90             | -                  | -               | 1 - 1 - 0                            | 0 - 0 - 0                           | 4-S lean burn                       |
| 23         | C             | 1,900             | 1,900          | -                  | -               | 2 - 0 - 0                            | 0 - 0 - 0                           | 4-S rich burn                       |
| 24         | C             | 1,480             | 1,480          | -                  | -               | 1 - 0 - 0                            | 0 - 0 - 0                           | 4-S lean burn                       |
| 25         | C             | 80                | 80             | -                  | -               | 1 - 0 - 0                            | 0 - 0 - 0                           | 4-S lean burn                       |
| 26         | C             | 1,500             | 1,500          | -                  | -               | 2 - 0 - 0                            | 0 - 0 - 0                           | 4-S rich burn                       |
| 27         | C             | 2,250             | 1,500          | -                  | -               | 2 - 0 - 1                            | 0 - 0 - 0                           | 4-S rich burn                       |
| 28         | C             | 90                | -              | -                  | -               | 0 - 1 - 0                            | 0 - 0 - 0                           | 4-S lean burn                       |
| 29         | C             | 335               | 335            | -                  | -               | 1 - 0 - 0                            | 0 - 0 - 0                           | 4-S lean burn                       |
| 30         | C             | -                 | -              | 7,700              | 7,700           | 0 - 0 - 0                            | 1 - 0 - 0                           | Solar Taurus 60                     |
| 31         | C             | 145               | 145            | -                  | -               | 1 - 0 - 0                            | 0 - 0 - 0                           | 4-S rich burn                       |
| 32         | C             | NR                | -              | -                  | -               | 0 - 1 - 0                            | 0 - 0 - 0                           | 4-S rich burn                       |
| 33         | C             | 650               | 650            | -                  | -               | 1 - 0 - 0                            | 0 - 0 - 0                           | 4-S rich burn                       |
| 34         | C             | 1,000             | 1,000          | -                  | -               | 1 - 0 - 0                            | 0 - 0 - 0                           | 4-S rich burn                       |
| 35         | C/D           | 3,450             | 2,300          | -                  | -               | 2 - 1 - 0                            | 0 - 0 - 0                           | 4-S rich burn                       |
| 36         | C/D           | 14,927            | 8,142          | -                  | -               | 6 - 0 - 5                            | 0 - 0 - 0                           | 4-S lean burn                       |
| 37         | C/D           | 8,875             | 7,100          | -                  | -               | 4 - 1 - 0                            | 0 - 0 - 0                           | 4-S lean burn                       |
| 38         | C/D           | 10,650            | 8,875          | -                  | -               | 5 - 1 - 0                            | 0 - 0 - 0                           | 4-S lean burn                       |
| 39         | C/D           | 15,540            | 15,540         | -                  | -               | 9 - 0 - 0                            | 0 - 0 - 0                           | 4-S lean burn                       |
| 40         | C/D           | 4,800             | 3,600          | -                  | -               | 3 - 0 - 1                            | 0 - 0 - 0                           | 4-S lean burn                       |
| 41         | C/D           | 10,060            | 5,325          | -                  | -               | 3 - 1 - 0                            | 0 - 0 - 0                           | 4-S lean burn                       |
| 42         | C/D           | 8,875             | 8,875          | -                  | -               | 5 - 0 - 0                            | 0 - 0 - 0                           | 4-S lean burn                       |
| 43         | C/D           | 5,520             | 4,140          | -                  | -               | 3 - 1 - 0                            | 0 - 0 - 0                           | 4-S ultra lean burn                 |
| 44         | C/D           | 10,650            | 10,650         | -                  | -               | 6 - 0 - 0                            | 0 - 0 - 0                           | 4-S lean burn                       |
| 45         | C/D           | 6,000             | 4,000          | -                  | -               | 4 - 0 - 2                            | 0 - 0 - 0                           | 4-S lean burn                       |
| 46         | C/D           | 10,650            | 7,100          | -                  | -               | 2 - 1 - 0                            | 0 - 0 - 0                           | 4-S lean burn                       |
| 47         | C/D           | 9,780             | 9,780          | -                  | -               | 6 - 0 - 0                            | 0 - 0 - 0                           | 4-S lean burn                       |

| Facility # | Facility Type | Engine HP (total) | Engine HP (OP) | Turbine HP (total) | Turbine HP (OP) | # Recip compressors (OP - NOP - NOD) | # Cent compressors (OP - NOP - NOD) | Notes on primary driver(s)           |
|------------|---------------|-------------------|----------------|--------------------|-----------------|--------------------------------------|-------------------------------------|--------------------------------------|
| 48         | C/D           | 11,990            | 11,990         | -                  | -               | 7 - 0 - 0                            | 0 - 0 - 0                           | 4-S lean burn                        |
| 49         | C/D           | 14,200            | 10,650         | -                  | -               | 6 - 2 - 0                            | 0 - 0 - 0                           | 4-S lean burn                        |
| 50         | C/D           | 4,050             | 4,050          | -                  | -               | 3 - 0 - 0                            | 0 - 0 - 0                           | 4-S lean burn                        |
| 51         | C/D           | 8,400             | 2,400          | -                  | -               | 2 - 0 - 5                            | 0 - 0 - 0                           | 4-S lean burn                        |
| 52         | C/D           | 7,100             | 7,100          | -                  | -               | 4 - 0 - 0                            | 0 - 0 - 0                           | 4-S lean burn                        |
| 53         | C/D           | 4,340             | 3,000          | -                  | -               | 1 - 0 - 1                            | 0 - 0 - 0                           | 4-S lean burn (1); Electric (1)      |
| 54         | C/D           | 6,785             | 5,428          | -                  | -               | 4 - 0 - 1                            | 0 - 0 - 0                           | 4-S lean burn                        |
| 55         | C/D           | 13,210            | 13,210         | -                  | -               | 9 - 0 - 0                            | 0 - 0 - 0                           | 4-S lean burn (6); 4-S rich burn (3) |
| 56         | C/D           | 6,100             | 4,600          | -                  | -               | 3 - 1 - 0                            | 0 - 0 - 0                           | 4-S rich burn                        |
| 57         | C/D           | 2,714             | 2,714          | -                  | -               | 2 - 0 - 0                            | 0 - 0 - 0                           | 4-S lean burn                        |
| 58         | C/D           | 4,800             | 3,600          | -                  | -               | 3 - 0 - 1                            | 0 - 0 - 0                           | 4-S lean burn                        |
| 59         | C/D           | 3,450             | 2,300          | -                  | -               | 2 - 1 - 0                            | 0 - 0 - 0                           | 4-S rich burn                        |
| 60         | C/D           | 3,260             | 1,680          | -                  | -               | 1 - 0 - 1                            | 0 - 0 - 0                           | 4-S rich burn                        |
| 61         | C/D           | 4,060             | 2,720          | -                  | -               | 2 - 0 - 1                            | 0 - 0 - 0                           | 4-S lean burn                        |
| 62         | C/D           | 6,230             | 6,230          | -                  | -               | 4 - 0 - 0                            | 0 - 0 - 0                           | 4-S lean burn                        |
| 63         | C/D           | 350               | 350            | -                  | -               | 1 - 0 - 0                            | 0 - 0 - 0                           | 2-S engine                           |
| 64         | C/D           | 17,750            | 14,200         | -                  | -               | 4 - 1 - 0                            | 0 - 0 - 0                           | 4-S lean burn                        |
| 65         | C/D           | 7,050             | 7,050          | -                  | -               | 3 - 0 - 0                            | 0 - 0 - 0                           | 4-S lean burn                        |
| 66         | C/D           | 4,180             | 2,840          | -                  | -               | 2 - 0 - 1                            | 0 - 0 - 0                           | 4-S lean burn (2); Electric (1 OP)   |
| 67         | C/D           | 2,600             | 1,300          | -                  | -               | 1 - 1 - 0                            | 0 - 0 - 0                           | 4-S lean burn                        |
| 68         | C/D           | 6,785             | 4,071          | -                  | -               | 3 - 0 - 2                            | 0 - 0 - 0                           | 4-S lean burn                        |
| 69         | C/D           | 5,325             | 5,325          | -                  | -               | 3 - 0 - 0                            | 0 - 0 - 0                           | 4-S lean burn                        |
| 70         | C/D           | 4,050             | 1,350          | -                  | -               | 1 - 0 - 2                            | 0 - 0 - 0                           | 4-S lean burn                        |
| 71         | C/D           | 3,550             | 3,550          | -                  | -               | 2 - 0 - 0                            | 0 - 0 - 0                           | 4-S lean burn                        |
| 72         | C/D           | 5,200             | 2,600          | -                  | -               | 2 - 2 - 0                            | 0 - 0 - 0                           | 4-S lean burn                        |
| 73         | C/D           | 2,680             | 2,680          | -                  | -               | 2 - 0 - 0                            | 0 - 0 - 0                           | 4-S lean burn                        |
| 74         | C/D           | 3,110             | 1,430          | -                  | -               | 1 - 0 - 1                            | 0 - 0 - 0                           | 4-S lean burn                        |
| 75         | C/D           | 3,000             | 3,000          | -                  | -               | 3 - 0 - 0                            | 0 - 0 - 0                           | 4-S rich burn                        |
| 76         | C/D           | 7,100             | 7,100          | -                  | -               | 4 - 0 - 0                            | 0 - 0 - 0                           | 4-S lean burn                        |
| 77         | C/D           | 1,340             | 1,340          | -                  | -               | 1 - 0 - 0                            | 0 - 0 - 0                           | 4-S lean burn                        |
| 78         | C/D           | 1,340             | 1,340          | -                  | -               | 1 - 0 - 0                            | 0 - 0 - 0                           | 4-S rich burn                        |
| 79         | C/D           | 1,380             | 1,380          | -                  | -               | 1 - 0 - 0                            | 0 - 0 - 0                           | 4-S rich burn                        |
| 80         | C/D           | 400               | 400            | -                  | -               | 1 - 0 - 0                            | 0 - 0 - 0                           | 4-S lean burn                        |
| 81         | C/D           | -                 | -              | 15,530             | 15,530          | 0 - 0 - 0                            | 3 - 0 - 0                           | Solar Centaur                        |
| 82         | C/D           | 3,059             | 3,059          | -                  | -               | 3 - 0 - 0                            | 0 - 0 - 0                           | 4-S rich burn                        |
| 83         | C/D           | 7,200             | 6,090          | -                  | -               | 5 - 1 - 0                            | 0 - 0 - 0                           | 4-S rich burn (4); 4-S lean burn (2) |
| 84         | C/D           | 635               | 635            | -                  | -               | 1 - 0 - 0                            | 0 - 0 - 0                           | 4-S lean burn                        |
| 85         | C/D           | 1,357             | 1,357          | -                  | -               | 1 - 0 - 0                            | 0 - 0 - 0                           | 4-S lean burn                        |
| 86         | C/D           | 1,350             | 1,350          | -                  | -               | 1 - 0 - 0                            | 0 - 0 - 0                           | 4-S lean burn                        |
| 87         | C/D           | 3,030             | 2,400          | -                  | -               | 2 - 0 - 1                            | 0 - 0 - 0                           | 4-S lean burn                        |
| 88         | C/D           | 2,750             | 1,375          | -                  | -               | 1 - 1 - 0                            | 0 - 0 - 0                           | 4-S lean burn                        |
| 89         | C/D           | 5,000             | 2,000          | -                  | -               | 2 - 0 - 3                            | 0 - 0 - 0                           | 4-S lean burn                        |
| 90         | C/D           | 8,280             | -              | 15,000             | 15,000          | 0 - 0 - 6                            | 1 - 0 - 0                           | 4-S lean burn (6); Solar turbine (1) |
| 91         | C/D           | 2,600             | 2,600          | -                  | -               | 2 - 0 - 0                            | 0 - 0 - 0                           | 4-S lean burn                        |
| 92         | C/D           | 90                | -              | -                  | -               | 0 - 0 - 1                            | 0 - 0 - 0                           | 4-S rich burn                        |
| 93         | C/D           | -                 | -              | 15,000             | 15,000          | 0 - 0 - 0                            | 1 - 0 - 0                           | Solar Mars                           |
| 94         | C/D           | 90                | 90             | -                  | -               | 1 - 0 - 0                            | 0 - 0 - 0                           | 4-S lean burn                        |
| 95         | C/D           | 7,100             | 7,100          | -                  | -               | 4 - 0 - 0                            | 0 - 0 - 0                           | 4-S lean burn                        |
| 96         | C/D           | 68                | 68             | -                  | -               | 1 - 0 - 0                            | 0 - 0 - 0                           | 4-S lean burn                        |
| 97         | C/D           | 169               | 169            | -                  | -               | 1 - 0 - 0                            | 0 - 0 - 0                           | 4-S rich burn                        |
| 98         | C/D           | 1,350             | 750            | -                  | -               | 1 - 1 - 0                            | 0 - 0 - 0                           | 4-S lean burn                        |
| 99         | C/D           | 415               | -              | -                  | -               | 0 - 0 - 1                            | 0 - 0 - 0                           | 4-S rich burn                        |
| 100        | C/D           | 95                | -              | -                  | -               | 0 - 1 - 0                            | 0 - 0 - 0                           | 4-S rich burn                        |
| 101        | C/D           | 145               | -              | -                  | -               | 0 - 1 - 0                            | 0 - 0 - 0                           | 2-S lean burn                        |
| 102        | C/D/T         | 4,095             | 4,095          | -                  | -               | 3 - 0 - 0                            | 0 - 0 - 0                           | 4-S lean burn                        |
| 103        | C/D/T         | 1,500             | -              | 10,000             | 10,000          | 0 - 0 - 1                            | 2 - 0 - 0                           | 4-S lean burn; Turbines (2)          |

| Facility # | Facility Type | Engine HP (total) | Engine HP (OP) | Turbine HP (total) | Turbine HP (OP) | # Recip compressors (OP - NOP - NOD) | # Cent compressors (OP - NOP - NOD) | Notes on primary driver(s)                                                           |
|------------|---------------|-------------------|----------------|--------------------|-----------------|--------------------------------------|-------------------------------------|--------------------------------------------------------------------------------------|
| 104        | C/D/T         | 4,800             | 4,800          | -                  | -               | 4 - 0 - 0                            | 0 - 0 - 0                           | 4-S lean burn                                                                        |
| 105        | C/D/T         | 5,060             | 5,060          | -                  | -               | 6 - 0 - 0                            | 0 - 0 - 0                           | 4-S lean burn (4); Electric (2)                                                      |
| 106        | C/D/T         | 13,780            | 13,780         | -                  | -               | 5 - 0 - 0                            | 0 - 0 - 0                           | 4-S lean burn (2); Electric (3)                                                      |
| 107        | C/D/T         | 4,800             | 3,600          | -                  | -               | 3 - 0 - 1                            | 0 - 0 - 0                           | 4-S lean burn                                                                        |
| 108        | C/D/T         | 4,800             | 4,800          | -                  | -               | 4 - 0 - 0                            | 0 - 0 - 0                           | 4-S lean burn                                                                        |
| 109        | C/D/T         | 670               | -              | -                  | -               | 0 - 1 - 0                            | 0 - 0 - 0                           | 4-S lean burn                                                                        |
| 110        | D             | -                 | -              | -                  | -               | 0 - 0 - 0                            | 0 - 0 - 0                           | None                                                                                 |
| 111        | D             | -                 | -              | -                  | -               | 0 - 0 - 0                            | 0 - 0 - 0                           | None                                                                                 |
| 112        | D             | -                 | -              | -                  | -               | 0 - 0 - 0                            | 0 - 0 - 0                           | None                                                                                 |
| 113        | D             | -                 | -              | -                  | -               | 0 - 0 - 0                            | 0 - 0 - 0                           | None                                                                                 |
| 114        | D             | -                 | -              | -                  | -               | 0 - 0 - 0                            | 0 - 0 - 0                           | None                                                                                 |
| 115        | D/T           | -                 | -              | -                  | -               | 0 - 0 - 0                            | 0 - 0 - 0                           | Turbines (2), not for compression                                                    |
| 116        | P             | 45,065            | 43,800         | -                  | -               | 11 - 9 - 0                           | 0 - 0 - 0                           | 4-S lean burn (8 OP, 1 NOP or NOD); 2-S lean burn (8 NOP or NOD); Electric (3 OP)    |
| 117        | P             | 14,677            | 4,773          | 48,000             | 16,000          | 3 - 7 - 0                            | 1 - 2 - 0                           | 4-S lean burn; Solar turbines                                                        |
| 118        | P             | -                 | -              | 126,310            | 85,665          | 1 - 1 - 0                            | 8 - 3 - 0                           | NR                                                                                   |
| 119        | P             | 50,000            | 35,714         | 10,000             | 6,667           | 5 - 0 - 2                            | 2 - 0 - 1                           | NR                                                                                   |
| 120        | P             | -                 | -              | 25,623             | 21,931          | 0 - 0 - 0                            | 8 - 0 - 1                           | Turbines (9)                                                                         |
| 121        | P             | 13,938            | 12,258         | -                  | -               | 8 - 0 - 1                            | 0 - 0 - 0                           | 4-S lean burn (12 OP); 2-S engines (2 OP); Generators (6) not included in horsepower |
| 122        | P             | 9,828             | 9,828          | -                  | -               | 10 - 0 - 0                           | 0 - 0 - 0                           | 4-S lean burn (5); Electric                                                          |
| 123        | P             | 22,400            | 19,200         | -                  | -               | 8 - 1 - 0                            | 0 - 0 - 0                           | 4-S lean burn; Electric (2)                                                          |
| 124        | P             | 11,436            | 11,436         | -                  | -               | 6 - 0 - 0                            | 0 - 0 - 0                           | 4-S rich burn (3); 4-S lean burn (5)                                                 |
| 125        | P             | 9,900             | NR             | -                  | -               | 0 - 0 - 0                            | 0 - 0 - 0                           | 4-S lean burn (3); Electric (6)                                                      |
| 126        | P             | 11,364            | 11,364         | 71,300             | 71,300          | 7 - 0 - 0                            | 7 - 0 - 0                           | 4-S lean burn; Solar turbines                                                        |
| 127        | P             | -                 | -              | 44,916             | 44,916          | 0 - 0 - 0                            | 3 - 0 - 0                           | Solar Titan                                                                          |
| 128        | P             | 2,120             | 2,120          | 27,000             | 24,000          | 2 - 0 - 0                            | 2 - 2 - 0                           | 4-S lean burn; Solar turbines                                                        |
| 129        | P             | -                 | -              | 45,000             | 15,000          | 0 - 0 - 0                            | 1 - 2 - 0                           | Solar Mars                                                                           |
| 130        | P             | 24,000            | 19,200         | -                  | -               | 4 - 1 - 0                            | 0 - 0 - 0                           | Electric                                                                             |
| 131        | P             | 1,570             | 1,170          | -                  | -               | 2 - 0 - 1                            | 0 - 0 - 0                           | 4-S rich burn                                                                        |

## C – Summary figures of onsite information

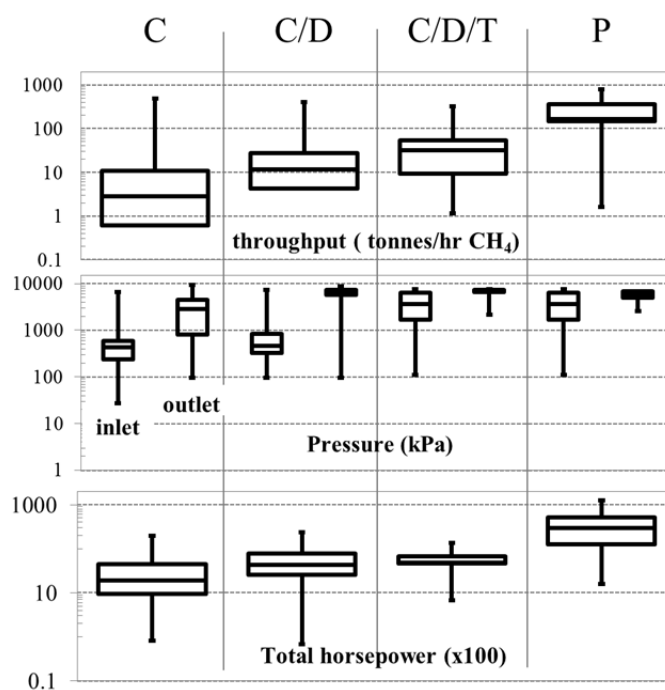

**Figure S1.** Information obtained from C, C/D, C/D/T, and P facilities sampled in this study. The boxes represent the 25<sup>th</sup>, 50<sup>th</sup>, and 75<sup>th</sup> percentiles of throughput (tonnes/hr CH<sub>4</sub>), inlet and outlet pressure (kPa), and total horsepower (motor + engine + turbine); whiskers represent the min and max. The minimum throughput at three C and two C/D facilities was zero.

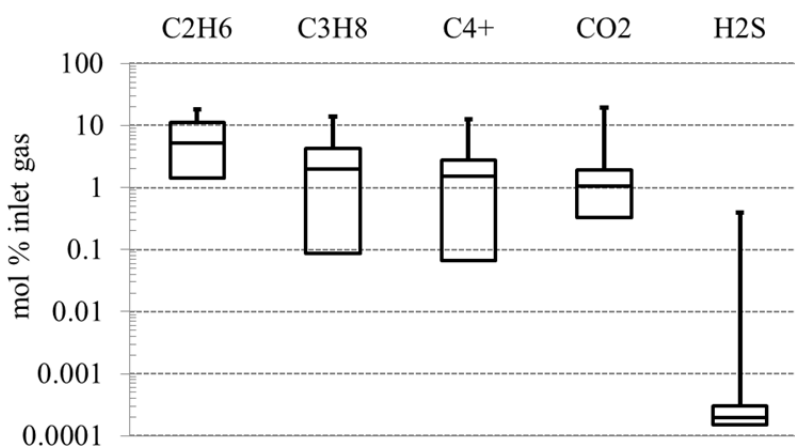

**Figure S2.** Non-methane species (mol/mol) in inlet gas at all 130 facilities. Box represents 25<sup>th</sup>, 50<sup>th</sup>, and 75<sup>th</sup> percentiles; top whisker is the maximum. Minimum mol % for all species was near zero. Data were obtained from company-provided gas chromatography analyses (Table S1). H<sub>2</sub>S was only reported by 40 facilities.



## D – Non-partner equipment collocated with study facilities

**Table S4.** Description of non-partner equipment collocated with study G&P facilities. Types of non-partner equipment were not specified in all cases, hence the use of the generic term natural gas “facility” to describe any non-specific observations of a non-partner equipment collocated or nearby a study facility.

| Facility # | Facility type | Description of non-partner equipment collocated with a study facility                                                                                                             |
|------------|---------------|-----------------------------------------------------------------------------------------------------------------------------------------------------------------------------------|
| 3          | C             | Wellhead and ~4 oil storage tanks; assessed and leaking order of magnitude less than target facility                                                                              |
| 9          | C             | Next to another natural gas “facility.”                                                                                                                                           |
| 10         | C             | One proximal wellhead, two other wells nearby.                                                                                                                                    |
| 13         | C             | Next to another natural gas “facility.”                                                                                                                                           |
| 14         | C             | Wellhead and production tank.                                                                                                                                                     |
| 17         | C             | Wellhead; no leaks observed.                                                                                                                                                      |
| 19         | C             | Wellhead, separator, and a condensate tank; separator and condensate tank are venting.                                                                                            |
| 22         | C             | Wellhead; no emissions were observed.                                                                                                                                             |
| 23         | C             | Meter run and tank battery.                                                                                                                                                       |
| 25         | C             | Wellhead; observed negligible emissions. Nearby well pad; emissions ~50% relative to target facility.                                                                             |
| 29         | C             | Single-well producing on pad; observed negligible emissions in mobile lab.                                                                                                        |
| 37         | C/D           | Valve nest and pigging facilities, with piping/valves and a condensate tank that are used when pigging (once every two weeks); small amount of venting from the condensate tank.  |
| 46         | C/D           | Inlet filter separator, pigging facilities, metering, piping, produced water tank; produced water tank appears to be venting steadily.                                            |
| 51         | C/D           | Wellhead and water tanks; described as "capped and probably not leaking much."                                                                                                    |
| 55         | C/D           | Between two natural gas “facilities,” venting from a produced water tank.                                                                                                         |
| 56         | C/D           | Three sales points, one of them owned the final system of valves and odorized at the outlet; valve was leaking.                                                                   |
| 57         | C/D           | Next to another natural gas “facility.”                                                                                                                                           |
| 58         | C/D           | Wellhead approximately 100 meters from target facility.                                                                                                                           |
| 59         | C/D           | Next to another natural gas “facility,” no observed leaks/venting and the flare appeared to be in stand-by.                                                                       |
| 62         | C/D           | Nearby another natural gas “facility.”                                                                                                                                            |
| 64         | C/D           | Wellhead and two water tanks; no leaks observed from well and tanks not observed                                                                                                  |
| 69         | C/D           | Valve nest and pigging facilities), with piping/valves and a condensate tank that are used when pigging (once every two weeks); small amount of venting from the condensate tank. |
| 77         | C/D           | Wellhead, separation equipment, and produced water tank; observed negligible emissions                                                                                            |
| 79         | C/D           | Wellhead and water tanks; described as "nearly empty" and no leaks observed                                                                                                       |
| 85         | C/D           | Wellhead approximately 100 meters from target facility.                                                                                                                           |
| 87         | C/D           | Nearby another natural gas “facility.”                                                                                                                                            |
| 92         | C/D           | Wellhead, dehydration unit, and flare; assessed and observed to be small relative to uncertainty but flare operated intermittently                                                |
| 99         | C/D           | Wellhead.                                                                                                                                                                         |
| 100        | C/D           | Dehydration unit, oil well (shut in), and tanks; observed no emissions from tanks.                                                                                                |
| 102        | C/D/T         | Adjacent C/D facility.                                                                                                                                                            |
| 110        | D             | Dehydration unit.                                                                                                                                                                 |
| 112        | D             | Wellhead.                                                                                                                                                                         |
| 113        | D             | Production well pad.                                                                                                                                                              |
| 114        | D             | Three-well production pad.                                                                                                                                                        |
| 120        | P             | Three other natural gas facilities on the periphery.                                                                                                                              |
| 125        | P             | Multiple production wellheads.                                                                                                                                                    |

## E – Documented changes to equipment and/or facility state(s)

**Table S5.** Brief descriptions of operational changes to G&P facilities, including adjustments to equipment, attempted corrective actions, and other events noted by the onsite observer. Observations of increased or reduced emission are also noted.

| Facility # | Facility type | Changes, adjustments, and other notable events during measurements                                                             |
|------------|---------------|--------------------------------------------------------------------------------------------------------------------------------|
| 1          | C             | Multiple compressor blowdowns                                                                                                  |
| 2          | C             | Adjusting compressor; shut down and restarted multiple times                                                                   |
| 4          | C             | Stopped flowing to sales                                                                                                       |
| 12         | C             | Loaded condensate which resulted in higher venting from two condensate tanks                                                   |
| 37         | C/D           | Attempted corrective actions to address substantial venting from liquids storage tanks                                         |
| 38         | C/D           | Adjusted suction side valves, potentially increasing venting from liquids storage                                              |
| 39         | C/D           | Fixed two "leaky" valves on inlet separator; closed stuck vent valve on liquids storage tanks after completion of measurements |
| 41         | C/D           | Vented section of sales pipe (10 minutes)                                                                                      |
| 44         | C/D           | Turned off second-stage compression process before measurements and restarted afterward                                        |
| 46         | C/D           | One compressor started, another went NOP                                                                                       |
| 48         | C/D           | Compressor shut down for maintenance and restarted (1 hour)                                                                    |
| 55         | C/D           | Produced water tank emptied (1 hour)                                                                                           |
| 61         | C/D           | Restarted combustor resulting in reduced venting from produced water tank                                                      |
| 64         | C/D           | Single compressor restarted multiple times, 2-3 minute vent during troubleshooting                                             |
| 76         | C/D           | Vented gas to produced water tanks due to frozen inlet separation valve (> 1 hour)                                             |
| 80         | C/D           | Reset diaphragm of liquid level controller, stopping previously observed emissions                                             |
| 85         | C/D           | Produced water dump lines opened and blown (1 minute)                                                                          |
| 87         | C/D           | Attempted corrective actions to seal on blowdown stack                                                                         |
| 88         | C/D           | Compressor started resulting in lower observed emissions from meter tubing                                                     |
| 104        | C/D/T         | Multiple restarts of a single compressor during measurements                                                                   |
| 105        | C/D/T         | Produced water or condensate tank emptied (40 minutes)                                                                         |
| 109        | C/D/T         | Multiple restarts and two blowdowns of a single compressor during measurements                                                 |
| 121        | P             | Compressor went NOP without releasing gas                                                                                      |
| 124        | P             | Counted seven trucks loading liquids during measurements; single compressor started                                            |
| 126        | P             | Blowdown of pig receiver and barrel                                                                                            |
| 128        | P             | Reciprocating engines started                                                                                                  |

## F – Observations from infrared camera surveys at gathering facilities

**Table S6.** Summary of infrared camera survey performed at 108 gathering facilities. Flags indicate documented observations of venting and leaking associated with equipment (liquids storage tanks, pneumatics) and processes (dehydration, compression). Other includes observed leaks at piping, inlet separation/filtration, meters, etc. These data represent only what was observed given time constraints and wind conditions (smaller magnitude emissions are difficult to observe in high winds). Another consideration is that the infrared camera may not be used to distinguish between non-methane hydrocarbons. N/A indicates no observations reported, which is the case when an infrared survey was not performed.

| Facility # | Facility type | Infrared survey performed? | Infrared video recorded? | Liquids storage (Substantial) | Liquids storage (Any) | Dehydration | Compression | Pneumatics | Other |
|------------|---------------|----------------------------|--------------------------|-------------------------------|-----------------------|-------------|-------------|------------|-------|
| 1          | C             | Yes                        | Yes                      | 1                             | 1                     | -           | 1           | -          | 1     |
| 2          | C             | Yes                        | No                       | -                             | -                     | -           | -           | -          | -     |
| 3          | C             | Yes                        | Yes                      | 1                             | 1                     | -           | -           | 1          | -     |
| 4          | C             | Yes                        | Yes                      | 1                             | 1                     | -           | -           | -          | -     |
| 5          | C             | Yes                        | No                       | -                             | -                     | -           | 1           | 1          | -     |
| 6          | C             | Yes                        | No                       | -                             | -                     | -           | -           | -          | -     |
| 7          | C             | Yes                        | Yes                      | -                             | -                     | -           | 1           | -          | 1     |
| 8          | C             | Yes                        | No                       | 1                             | -                     | -           | -           | -          | -     |
| 9          | C             | Yes                        | No                       | -                             | -                     | -           | -           | 1          | -     |
| 10         | C             | Yes                        | No                       | -                             | -                     | -           | -           | -          | -     |
| 11         | C             | Yes                        | Yes                      | -                             | 1                     | -           | -           | -          | 1     |
| 12         | C             | Yes                        | No                       | -                             | -                     | -           | 1           | 1          | 1     |
| 13         | C             | Yes                        | Yes                      | -                             | -                     | -           | 1           | -          | -     |
| 14         | C             | Yes                        | Yes                      | -                             | -                     | -           | -           | 1          | -     |
| 15         | C             | Yes                        | Yes                      | -                             | -                     | -           | 1           | -          | -     |
| 16         | C             | Yes                        | No                       | -                             | -                     | -           | -           | -          | -     |
| 17         | C             | Yes                        | No                       | -                             | -                     | -           | -           | -          | -     |
| 18         | C             | Yes                        | Yes                      | -                             | 1                     | -           | -           | -          | -     |
| 19         | C             | Yes                        | No                       | -                             | 1                     | -           | -           | -          | 1     |
| 20         | C             | No                         | No                       | N/A                           | N/A                   | N/A         | N/A         | N/A        | N/A   |
| 21         | C             | Yes                        | No                       | -                             | -                     | -           | -           | 1          | -     |
| 22         | C             | Yes                        | No                       | -                             | 1                     | -           | -           | -          | -     |
| 23         | C             | Yes                        | Yes                      | -                             | 1                     | -           | 1           | 1          | -     |
| 24         | C             | Yes                        | Yes                      | -                             | 1                     | -           | 1           | -          | 1     |
| 25         | C             | Yes                        | Yes                      | -                             | -                     | -           | -           | 1          | -     |
| 26         | C             | Yes                        | Yes                      | -                             | -                     | -           | -           | -          | -     |
| 27         | C             | Yes                        | Yes                      | -                             | -                     | -           | -           | -          | -     |
| 28         | C             | Yes                        | Yes                      | -                             | 1                     | -           | 1           | -          | -     |
| 29         | C             | Yes                        | Yes                      | -                             | -                     | -           | 1           | -          | -     |
| 30         | C             | Yes                        | Yes                      | -                             | -                     | -           | 1           | -          | -     |
| 31         | C             | Yes                        | Yes                      | -                             | -                     | -           | -           | -          | -     |

| Facility # | Facility type | Infrared survey performed? | Infrared video recorded? | Liquids storage (Substantial) | Liquids storage (Any) | Dehydration | Compression | Pneumatics | Other |
|------------|---------------|----------------------------|--------------------------|-------------------------------|-----------------------|-------------|-------------|------------|-------|
| 32         | C             | Yes                        | Yes                      | -                             | -                     | -           | 1           | -          | -     |
| 33         | C             | Yes                        | Yes                      | -                             | -                     | -           | 1           | -          | -     |
| 34         | C             | Yes                        | Yes                      | -                             | -                     | -           | -           | -          | -     |
| 35         | C/D           | Yes                        | Yes                      | 1                             | 1                     | -           | -           | -          | -     |
| 36         | C/D           | Yes                        | No                       | 1                             | 1                     | 1           | 1           | -          | -     |
| 37         | C/D           | Yes                        | Yes                      | 1                             | 1                     | -           | -           | 1          | -     |
| 38         | C/D           | Yes                        | Yes                      | 1                             | 1                     | -           | -           | -          | -     |
| 39         | C/D           | Yes                        | Yes                      | 1                             | 1                     | -           | -           | 1          | -     |
| 40         | C/D           | Yes                        | Yes                      | -                             | -                     | -           | 1           | -          | -     |
| 41         | C/D           | Yes                        | Yes                      | 1                             | 1                     | -           | -           | -          | -     |
| 42         | C/D           | Yes                        | Yes                      | 1                             | 1                     | -           | -           | -          | -     |
| 43         | C/D           | Yes                        | Yes                      | 1                             | 1                     | -           | -           | -          | -     |
| 44         | C/D           | Yes                        | Yes                      | 1                             | 1                     | -           | -           | 1          | -     |
| 45         | C/D           | Yes                        | No                       | 1                             | 1                     | -           | 1           | -          | -     |
| 46         | C/D           | Yes                        | Yes                      | -                             | -                     | 1           | 1           | -          | -     |
| 47         | C/D           | Yes                        | No                       | -                             | -                     | -           | -           | -          | -     |
| 48         | C/D           | Yes                        | Yes                      | -                             | -                     | -           | -           | 1          | -     |
| 49         | C/D           | Yes                        | Yes                      | 1                             | 1                     | -           | -           | -          | -     |
| 50         | C/D           | Yes                        | No                       | -                             | 1                     | -           | -           | -          | -     |
| 51         | C/D           | Yes                        | Yes                      | -                             | 1                     | -           | 1           | -          | -     |
| 52         | C/D           | Yes                        | No                       | -                             | -                     | -           | -           | -          | -     |
| 53         | C/D           | Yes                        | No                       | -                             | -                     | -           | -           | -          | 1     |
| 54         | C/D           | Yes                        | No                       | -                             | 1                     | -           | 1           | 1          | 1     |
| 55         | C/D           | Yes                        | Yes                      | -                             | 1                     | -           | 1           | -          | -     |
| 56         | C/D           | Yes                        | Yes                      | -                             | -                     | -           | 1           | 1          | -     |
| 57         | C/D           | Yes                        | No                       | -                             | 1                     | -           | 1           | -          | -     |
| 58         | C/D           | Yes                        | Yes                      | 1                             | 1                     | -           | -           | -          | -     |
| 59         | C/D           | Yes                        | Yes                      | -                             | 1                     | -           | -           | -          | -     |
| 60         | C/D           | No                         | No                       | N/A                           | N/A                   | N/A         | N/A         | N/A        | N/A   |
| 61         | C/D           | Yes                        | Yes                      | 1                             | 1                     | -           | 1           | -          | -     |
| 62         | C/D           | Yes                        | No                       | -                             | -                     | -           | -           | -          | -     |
| 63         | C/D           | Yes                        | Yes                      | 1                             | 1                     | -           | 1           | 1          | -     |
| 64         | C/D           | No                         | No                       | N/A                           | N/A                   | N/A         | N/A         | N/A        | N/A   |
| 65         | C/D           | Yes                        | Yes                      | -                             | 1                     | -           | 1           | -          | -     |
| 66         | C/D           | Yes                        | No                       | -                             | -                     | -           | -           | -          | -     |
| 67         | C/D           | Yes                        | Yes                      | 1                             | 1                     | -           | -           | 1          | -     |
| 68         | C/D           | Yes                        | No                       | -                             | 1                     | -           | 1           | -          | -     |
| 69         | C/D           | Yes                        | Yes                      | -                             | -                     | -           | -           | 1          | -     |
| 70         | C/D           | Yes                        | No                       | -                             | -                     | -           | -           | -          | -     |
| 71         | C/D           | Yes                        | No                       | -                             | -                     | -           | -           | -          | -     |
| 72         | C/D           | Yes                        | No                       | -                             | -                     | -           | -           | 1          | -     |
| 73         | C/D           | Yes                        | Yes                      | -                             | 1                     | -           | -           | 1          | -     |
| 74         | C/D           | No                         | No                       | N/A                           | N/A                   | N/A         | N/A         | N/A        | N/A   |
| 75         | C/D           | Yes                        | No                       | -                             | -                     | -           | 1           | 1          | 1     |
| 76         | C/D           | Yes                        | Yes                      | -                             | -                     | -           | -           | -          | -     |
| 77         | C/D           | Yes                        | Yes                      | -                             | -                     | -           | 1           | 1          | -     |
| 78         | C/D           | Yes                        | No                       | -                             | -                     | -           | -           | -          | -     |
| 79         | C/D           | Yes                        | Yes                      | -                             | -                     | -           | -           | -          | -     |
| 80         | C/D           | Yes                        | Yes                      | 1                             | 1                     | -           | -           | 1          | -     |
| 81         | C/D           | Yes                        | Yes                      | -                             | -                     | -           | 1           | -          | -     |

| Facility # | Facility type | Infrared survey performed? | Infrared video recorded? | Liquids storage (Substantial) | Liquids storage (Any) | Dehydration | Compression | Pneumatics | Other |
|------------|---------------|----------------------------|--------------------------|-------------------------------|-----------------------|-------------|-------------|------------|-------|
| 82         | C/D           | No                         | No                       | N/A                           | N/A                   | N/A         | N/A         | N/A        | N/A   |
| 83         | C/D           | Yes                        | Yes                      | -                             | -                     | -           | -           | -          | -     |
| 84         | C/D           | Yes                        | Yes                      | -                             | -                     | -           | -           | 1          | -     |
| 85         | C/D           | Yes                        | No                       | -                             | 1                     | 1           | 1           | -          | 1     |
| 86         | C/D           | Yes                        | No                       | -                             | -                     | -           | -           | -          | -     |
| 87         | C/D           | Yes                        | Yes                      | -                             | -                     | -           | -           | -          | 1     |
| 88         | C/D           | Yes                        | Yes                      | -                             | -                     | -           | -           | -          | 1     |
| 89         | C/D           | Yes                        | No                       | -                             | -                     | 1           | 1           | 1          | -     |
| 90         | C/D           | Yes                        | No                       | -                             | -                     | -           | -           | -          | -     |
| 91         | C/D           | Yes                        | Yes                      | -                             | -                     | -           | -           | -          | -     |
| 92         | C/D           | Yes                        | Yes                      | -                             | -                     | 1           | -           | -          | -     |
| 93         | C/D           | Yes                        | No                       | -                             | 1                     | -           | 1           | -          | 1     |
| 94         | C/D           | Yes                        | Yes                      | -                             | 1                     | -           | 1           | -          | -     |
| 95         | C/D           | Yes                        | Yes                      | -                             | 1                     | -           | -           | -          | -     |
| 96         | C/D           | Yes                        | Yes                      | -                             | -                     | 1           | -           | 1          | -     |
| 97         | C/D           | Yes                        | Yes                      | -                             | -                     | -           | -           | -          | 1     |
| 98         | C/D           | Yes                        | Yes                      | -                             | 1                     | 1           | 1           | -          | -     |
| 99         | C/D           | Yes                        | Yes                      | -                             | -                     | -           | -           | -          | -     |
| 100        | C/D           | Yes                        | No                       | -                             | -                     | -           | -           | -          | -     |
| 101        | C/D           | Yes                        | No                       | -                             | -                     | -           | -           | -          | 1     |
| 102        | C/D/T         | Yes                        | No                       | 1                             | -                     | -           | -           | -          | 1     |
| 103        | C/D/T         | Yes                        | Yes                      | 1                             | 1                     | -           | -           | -          | -     |
| 104        | C/D/T         | Yes                        | Yes                      | 1                             | -                     | 1           | 1           | -          | -     |
| 105        | C/D/T         | Yes                        | No                       | -                             | -                     | -           | -           | -          | -     |
| 106        | C/D/T         | Yes                        | No                       | -                             | -                     | -           | -           | -          | -     |
| 107        | C/D/T         | Yes                        | Yes                      | -                             | -                     | -           | -           | -          | -     |
| 108        | C/D/T         | Yes                        | No                       | -                             | -                     | -           | 1           | -          | 1     |
| 109        | C/D/T         | Yes                        | Yes                      | -                             | 1                     | -           | -           | -          | -     |
| 110        | D             | Yes                        | Yes                      | -                             | -                     | 1           | -           | 1          | 1     |
| 111        | D             | Yes                        | Yes                      | -                             | -                     | -           | -           | 1          | 1     |
| 112        | D             | Yes                        | Yes                      | -                             | -                     | 1           | -           | -          | -     |
| 113        | D             | Yes                        | Yes                      | -                             | -                     | -           | -           | -          | 1     |
| 114        | D             | Yes                        | Yes                      | -                             | -                     | -           | -           | -          | 1     |
| 115        | D/T           | No                         | No                       | N/A                           | N/A                   | N/A         | N/A         | N/A        | N/A   |
| 116        | P             | No                         | No                       | N/A                           | N/A                   | N/A         | N/A         | N/A        | N/A   |
| 117        | P             | No                         | No                       | N/A                           | N/A                   | N/A         | N/A         | N/A        | N/A   |
| 118        | P             | No                         | No                       | N/A                           | N/A                   | N/A         | N/A         | N/A        | N/A   |
| 119        | P             | No                         | No                       | N/A                           | N/A                   | N/A         | N/A         | N/A        | N/A   |
| 120        | P             | No                         | No                       | N/A                           | N/A                   | N/A         | N/A         | N/A        | N/A   |
| 121        | P             | No                         | No                       | N/A                           | N/A                   | N/A         | N/A         | N/A        | N/A   |
| 122        | P             | No                         | No                       | N/A                           | N/A                   | N/A         | N/A         | N/A        | N/A   |
| 123        | P             | No                         | No                       | N/A                           | N/A                   | N/A         | N/A         | N/A        | N/A   |
| 124        | P             | No                         | No                       | N/A                           | N/A                   | N/A         | N/A         | N/A        | N/A   |
| 125        | P             | No                         | No                       | N/A                           | N/A                   | N/A         | N/A         | N/A        | N/A   |
| 126        | P             | No                         | No                       | N/A                           | N/A                   | N/A         | N/A         | N/A        | N/A   |
| 127        | P             | No                         | No                       | N/A                           | N/A                   | N/A         | N/A         | N/A        | N/A   |
| 128        | P             | No                         | No                       | N/A                           | N/A                   | N/A         | N/A         | N/A        | N/A   |
| 129        | P             | No                         | No                       | N/A                           | N/A                   | N/A         | N/A         | N/A        | N/A   |
| 130        | P             | No                         | No                       | N/A                           | N/A                   | N/A         | N/A         | N/A        | N/A   |
| 131        | P             | No                         | No                       | N/A                           | N/A                   | N/A         | N/A         | N/A        | N/A   |

## **G – Brief description of tracer flux methodology**

Roscoli et al.<sup>5</sup> describes in detail the tracer flux methodology used by this study. Briefly, it involved releasing two tracer gases, nitrous oxide ( $\text{N}_2\text{O}$ ) and acetylene ( $\text{C}_2\text{H}_2$ ), at a known emission rate from the target facility. The concentrations of these tracers, as well as ethane, carbon monoxide, carbon dioxide, and the target analyte (methane) were then measured downwind of the facility using high time resolved instrumentation deployed on a mobile sampling laboratory. The measurements were made by driving the mobile laboratory at a constant speed on a downwind road that is perpendicular to the wind direction to develop a plume profile, as illustrated in Figure S3. This was done repeatedly obtain multiple plume profiles. The measured concentration ratio of these species in combination with the tracer release rates were used to estimate the facility-level methane emission rate from individual plumes. The ethane-to-methane mixing ratio measured in the plume was also used to attribute the measured methane to the target facility. Roscoli et al.<sup>5</sup> details the methods for analyzing the plume profiles to obtain facility-level emissions over a period of a couple minutes (the typical duration of a plume transect). Importantly, interpreting these data does not require modeling pollutant dispersion - that complexity is captured by the tracers.

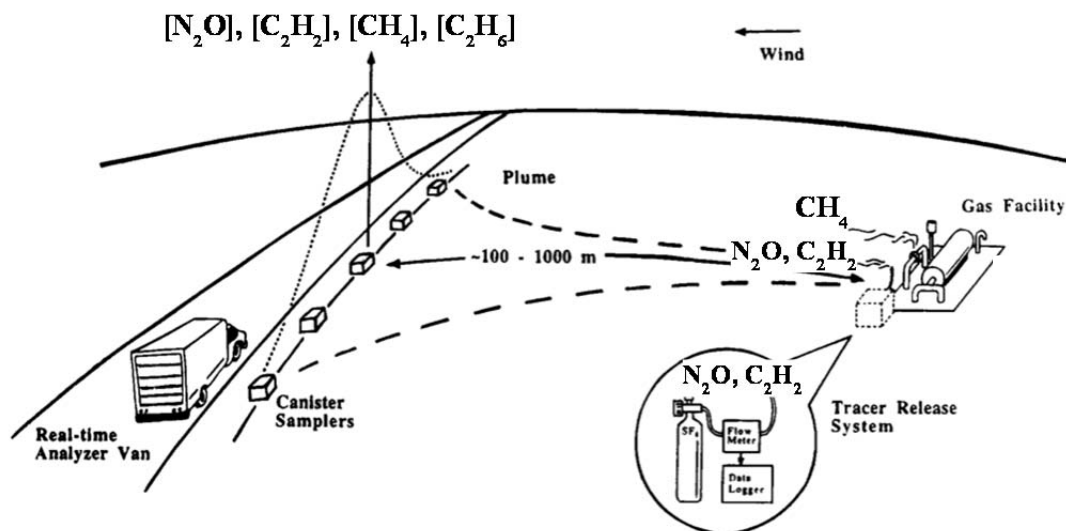

**Figure S3.** Schematic of the tracer flux measurement method showing the tracer release at the source of interest, and the use of a mobile lab to locate and sample the methane/tracer plumes. Reproduced and modified from Lamb et al.<sup>6</sup>. Canisters were not used in this study.

## **H –Tracer flux measurements results**

Out of the 136 facilities visited by the Carnegie Mellon University and Aerodyne Research tracer teams, emissions data are reported for 130 facilities (131 WAFLER estimates), which are presented in Table S7. Two WAFLER estimates are given for one facility (facility #'s 35 and 59), which was initially venting substantial amounts of methane. For two facilities (#41 and 46) a leak on one of the mobile lab's inlet sampling line caused minor dilution of the sampled plumes. WAFLER estimates from these two facilities were not impacted because all instruments pulled from a common sampling line, which would result in equal dilution of measured species. No methane emissions data are reported for six facilities. Poor wind conditions and instrument malfunction hampered data collection at four facilities, while significant from methane interference impacted measurements at two. The interference at one facility was from a nearby natural gas facility, which was determined to be emitting significantly more methane than the target facility. At the other, which was in West Virginia, the interference was caused by methane venting from an operating mine. The presence of methane emissions from mine vents in this region has been noted elsewhere.<sup>7</sup>



**Table S7.** Summary tracer flux measurements for 130 G&P facilities reported in this study, including average downwind distance from facility to mobile lab, average wind speed measured from a height of 2m at the facility, the approximate ambient temperature at the start of measurements, and the total number of accepted downwind plumes. The results given are the weighted average facility-level emission rates (WAFLER) of CH<sub>4</sub>, the unbiased weighted standard deviation of WAFLER, and the throughput-normalized WAFLER (tnWAFLER) as a percentage of facility CH<sub>4</sub> throughput. tnWAFLER could not be calculated for six facilities (indicated by N/A). Ambient temperature was not recorded at a few facilities (indicated by NR).

| Facility # | Facility Type | Avg. downwind distance <sup>1</sup> (km) | Avg. wind speed <sup>2</sup> (m/s, @ 2m) | Approximate ambient temperature (C) | # Accepted plumes | WAFLER (kg/hr CH <sub>4</sub> ) | Unbiased weighted standard deviation WAFLER (kg/hr) | tnWAFLER (as a % of CH <sub>4</sub> throughput) |
|------------|---------------|------------------------------------------|------------------------------------------|-------------------------------------|-------------------|---------------------------------|-----------------------------------------------------|-------------------------------------------------|
| 1          | C             | 2.9                                      | 3.3                                      | 4.7                                 | 6                 | 255.1                           | 84.4                                                | 1.11%                                           |
| 2          | C             | 0.5                                      | 1.3                                      | 8.9                                 | 4                 | 94.3                            | 60.0                                                | 0.65%                                           |
| 3          | C             | 0.5                                      | 3.0                                      | 5.8                                 | 27                | 74.5                            | 16.2                                                | 17.52%                                          |
| 4          | C             | 2.1                                      | 4.4                                      | 11.7                                | 9                 | 64.8                            | 56.1                                                | N/A                                             |
| 5          | C             | 0.8                                      | 1.7                                      | 8.9                                 | 7                 | 62.4                            | 17.7                                                | 0.45%                                           |
| 6          | C             | 0.9                                      | 1.9                                      | 7.2                                 | 12                | 43.9                            | 23.7                                                | 0.17%                                           |
| 7          | C             | 1.8                                      | 6.4                                      | 1.1                                 | 4                 | 43.8                            | 8.4                                                 | 1.03%                                           |
| 8          | C             | 0.4                                      | 3.7                                      | 12.5                                | 7                 | 41.6                            | 30.9                                                | 0.90%                                           |
| 9          | C             | 0.5                                      | 2.4                                      | 10.0                                | 10                | 29.6                            | 9.7                                                 | 0.46%                                           |
| 10         | C             | 2.0                                      | 4.0                                      | 3.3                                 | 5                 | 28.8                            | 6.5                                                 | 0.35%                                           |
| 11         | C             | 1.0                                      | 2.5                                      | 1.7                                 | 7                 | 21.9                            | 6.3                                                 | <0.01%                                          |
| 12         | C             | 0.6                                      | 2.5                                      | 15.6                                | 3                 | 19.8                            | 3.1                                                 | 0.05%                                           |
| 13         | C             | 0.8                                      | 3.4                                      | 5.3                                 | 10                | 17.9                            | 3.2                                                 | 0.48%                                           |
| 14         | C             | 0.9                                      | 2.6                                      | 5.8                                 | 13                | 14.8                            | 2.1                                                 | 8.45%                                           |
| 15         | C             | 1.2                                      | 9.1                                      | 11.1                                | 17                | 13.5                            | 2.6                                                 | 0.81%                                           |
| 16         | C             | 0.7                                      | 2.3                                      | 1.1                                 | 8                 | 9.3                             | 8.2                                                 | 0.07%                                           |
| 17         | C             | 1.6                                      | 3.8                                      | 4.4                                 | 16                | 9.2                             | 3.0                                                 | 0.22%                                           |
| 18         | C             | 1.9                                      | 5.7                                      | 23.9                                | 5                 | 8.4                             | 2.0                                                 | 0.39%                                           |
| 19         | C             | 1.0                                      | 2.1                                      | 15.6                                | 2                 | 8.3                             | 6.2                                                 | 0.60%                                           |
| 20         | C             | 0.6                                      | 4.2                                      | 7.2                                 | 13                | 8.3                             | 2.4                                                 | 0.58%                                           |
| 21         | C             | 1.1                                      | 4.2                                      | 1.7                                 | 42                | 7.9                             | 1.9                                                 | 1.58%                                           |
| 22         | C             | 1.0                                      | 4.2                                      | 20.0                                | 16                | 7.7                             | 9.4                                                 | 1.66%                                           |
| 23         | C             | 0.2                                      | 4.5                                      | 21.4                                | 4                 | 7.1                             | 0.9                                                 | 0.41%                                           |
| 24         | C             | 0.6                                      | 5.9                                      | 4.4                                 | 7                 | 6.2                             | 1.5                                                 | 0.14%                                           |
| 25         | C             | 1.1                                      | 4.7                                      | 5.6                                 | 6                 | 5.8                             | 1.4                                                 | 2.25%                                           |
| 26         | C             | 0.6                                      | 5.7                                      | 17.2                                | 9                 | 5.5                             | 1.3                                                 | 0.24%                                           |
| 27         | C             | 0.5                                      | 5.1                                      | 4.4                                 | 8                 | 5.2                             | 1.3                                                 | 0.19%                                           |
| 28         | C             | 0.7                                      | 1.5                                      | 24.7                                | 8                 | 5.0                             | 6.3                                                 | N/A                                             |
| 29         | C             | 0.8                                      | 4.3                                      | 1.1                                 | 36                | 5.0                             | 1.4                                                 | 0.97%                                           |
| 30         | C             | 0.3                                      | 8.4                                      | 3.3                                 | 2                 | 3.4                             | 0.4                                                 | <0.01%                                          |
| 31         | C             | 1.0                                      | 6.3                                      | 21.7                                | 11                | 2.7                             | 3.2                                                 | 0.38%                                           |
| 32         | C             | 0.2                                      | 5.3                                      | 15.6                                | 13                | 1.6                             | 1.0                                                 | N/A                                             |
| 33         | C             | 1.0                                      | 6.4                                      | 10.8                                | 5                 | 1.2                             | 0.5                                                 | 0.17%                                           |
| 34         | C             | 0.3                                      | 7.0                                      | 13.9                                | 3                 | 0.9                             | 0.1                                                 | 0.08%                                           |
| 35         | C/D           | 1.0                                      | 2.4                                      | NR                                  | 2                 | 698.6                           | 63.2                                                | 9.54%                                           |
| 36         | C/D           | 0.5                                      | 5.1                                      | 3.9                                 | 5                 | 344.1                           | 95.2                                                | 1.09%                                           |
| 37         | C/D           | 1.1                                      | 3.5                                      | -1.7                                | 8                 | 240.5                           | 66.9                                                | 0.98%                                           |
| 38         | C/D           | 1.5                                      | 1.7                                      | -8.9                                | 5                 | 217.6                           | 79.4                                                | 1.12%                                           |
| 39         | C/D           | 0.7                                      | 4.1                                      | 0.3                                 | 18                | 196.1                           | 64.0                                                | 0.39%                                           |

| Facility # | Facility Type | Avg. downwind distance <sup>1</sup> (km) | Avg. wind speed <sup>2</sup> (m/s, @ 2m) | Approximate ambient temperature (C) | # Accepted plumes | WAFLER (kg/hr CH <sub>4</sub> ) | Unbiased weighted standard deviation WAFLER (kg/hr) | tnWAFLER (as a % of CH <sub>4</sub> throughput) |
|------------|---------------|------------------------------------------|------------------------------------------|-------------------------------------|-------------------|---------------------------------|-----------------------------------------------------|-------------------------------------------------|
| 40         | C/D           | 0.5                                      | 2.1                                      | -0.8                                | 17                | 195.3                           | 67.8                                                | 2.44%                                           |
| 41         | C/D           | 0.8                                      | 0.6                                      | 5.6                                 | 8                 | 159.8                           | 71.2                                                | 0.10%                                           |
| 42         | C/D           | 1.8                                      | 10.2                                     | 7.8                                 | 16                | 146.7                           | 67.0                                                | 0.59%                                           |
| 43         | C/D           | 2.0                                      | 8.5                                      | 5.6                                 | 23                | 145.2                           | 29.4                                                | 0.76%                                           |
| 44         | C/D           | 0.8                                      | 2.3                                      | 0.6                                 | 15                | 119.0                           | 86.0                                                | 0.36%                                           |
| 45         | C/D           | 0.5                                      | 3.3                                      | 2.8                                 | 31                | 112.0                           | 58.7                                                | 0.75%                                           |
| 46         | C/D           | 1.9                                      | 1.2                                      | 1.1                                 | 6                 | 109.1                           | 98.0                                                | 0.05%                                           |
| 47         | C/D           | 0.8                                      | 2.9                                      | -2.5                                | 13                | 106.6                           | 56.3                                                | 0.37%                                           |
| 48         | C/D           | 1.0                                      | 3.8                                      | 1.7                                 | 11                | 98.6                            | 72.7                                                | 0.27%                                           |
| 49         | C/D           | 0.7                                      | 4.3                                      | -1.1                                | 22                | 93.4                            | 19.1                                                | 0.41%                                           |
| 50         | C/D           | 0.7                                      | 7.4                                      | 5.0                                 | 26                | 92.8                            | 41.0                                                | 0.52%                                           |
| 51         | C/D           | 3.1                                      | 1.8                                      | 0.6                                 | 6                 | 82.9                            | 33.2                                                | 1.35%                                           |
| 52         | C/D           | 0.5                                      | 4.3                                      | 0.0                                 | 12                | 76.3                            | 32.2                                                | 0.33%                                           |
| 53         | C/D           | 0.4                                      | 2.0                                      | -1.1                                | 12                | 76.0                            | 39.2                                                | 0.99%                                           |
| 54         | C/D           | 0.6                                      | 2.8                                      | 1.7                                 | 4                 | 71.7                            | 17.1                                                | 0.50%                                           |
| 55         | C/D           | 0.6                                      | 2.1                                      | NR                                  | 11                | 66.7                            | 32.9                                                | 0.14%                                           |
| 56         | C/D           | 0.6                                      | 2.7                                      | 15.6                                | 8                 | 63.5                            | 51.1                                                | 0.38%                                           |
| 57         | C/D           | 1.3                                      | 7.2                                      | 7.2                                 | 8                 | 61.1                            | 17.4                                                | 0.17%                                           |
| 58         | C/D           | 0.6                                      | 3.3                                      | 4.4                                 | 7                 | 59.4                            | 20.9                                                | 0.40%                                           |
| 59         | C/D           | 0.7                                      | 3.5                                      | NR                                  | 8                 | 49.7                            | 13.9                                                | 0.68%                                           |
| 60         | C/D           | 2.5                                      | 4.9                                      | -3.9                                | 18                | 48.6                            | 11.8                                                | 1.63%                                           |
| 61         | C/D           | 0.4                                      | 4.2                                      | 15.0                                | 16                | 47.7                            | 21.7                                                | 0.84%                                           |
| 62         | C/D           | 1.0                                      | 2.6                                      | -1.1                                | 15                | 47.6                            | 23.7                                                | 0.21%                                           |
| 63         | C/D           | 1.0                                      | 2.5                                      | -2.2                                | 18                | 46.8                            | 12.1                                                | 17.08%                                          |
| 64         | C/D           | 1.2                                      | 2.4                                      | 0.0                                 | 9                 | 45.1                            | 18.9                                                | 0.01%                                           |
| 65         | C/D           | 1.5                                      | 11.1                                     | 2.8                                 | 8                 | 36.4                            | 29.9                                                | 0.17%                                           |
| 66         | C/D           | 0.6                                      | 5.3                                      | -5.3                                | 36                | 35.8                            | 8.9                                                 | 0.51%                                           |
| 67         | C/D           | 1.4                                      | 9.1                                      | 14.4                                | 16                | 34.5                            | 5.6                                                 | 2.16%                                           |
| 68         | C/D           | 0.4                                      | 4.9                                      | 10.0                                | 3                 | 34.5                            | 12.9                                                | 0.31%                                           |
| 69         | C/D           | 0.7                                      | 2.8                                      | 8.6                                 | 8                 | 33.9                            | 10.0                                                | 0.24%                                           |
| 70         | C/D           | 1.5                                      | 8.1                                      | 21.7                                | 17                | 32.7                            | 22.4                                                | 0.31%                                           |
| 71         | C/D           | 0.9                                      | 1.8                                      | 13.1                                | 13                | 26.5                            | 8.8                                                 | 0.55%                                           |
| 72         | C/D           | 0.4                                      | 8.9                                      | 21.1                                | 21                | 26.4                            | 12.9                                                | 0.68%                                           |
| 73         | C/D           | 0.7                                      | 2.7                                      | -1.1                                | 12                | 26.2                            | 10.8                                                | 0.31%                                           |
| 74         | C/D           | 1.7                                      | 2.7                                      | 7.2                                 | 12                | 26.0                            | 10.4                                                | 1.17%                                           |
| 75         | C/D           | 0.4                                      | 3.4                                      | 4.4                                 | 2                 | 25.9                            | 6.9                                                 | 0.37%                                           |
| 76         | C/D           | 1.1                                      | 4.1                                      | -7.2                                | 16                | 23.8                            | 12.2                                                | 0.11%                                           |
| 77         | C/D           | 1.7                                      | 4.6                                      | 6.1                                 | 6                 | 22.3                            | 13.1                                                | 0.79%                                           |
| 78         | C/D           | 0.9                                      | 5.5                                      | 10.0                                | 8                 | 22.0                            | 1.0                                                 | 11.84%                                          |
| 79         | C/D           | 1.1                                      | 5.9                                      | 7.2                                 | 26                | 21.7                            | 5.3                                                 | 0.49%                                           |
| 80         | C/D           | 0.7                                      | 2.5                                      | 21.1                                | 8                 | 17.9                            | 6.0                                                 | 3.04%                                           |
| 81         | C/D           | 0.2                                      | 3.4                                      | 5.0                                 | 2                 | 17.7                            | 3.6                                                 | 0.07%                                           |
| 82         | C/D           | 2.1                                      | 6.1                                      | 1.1                                 | 13                | 15.0                            | 5.0                                                 | 0.45%                                           |
| 83         | C/D           | 0.2                                      | 2.2                                      | 21.1                                | 3                 | 13.7                            | 2.0                                                 | 0.04%                                           |
| 84         | C/D           | 0.4                                      | 4.5                                      | 10.0                                | 18                | 13.2                            | 5.4                                                 | 0.59%                                           |
| 85         | C/D           | 0.2                                      | 5.4                                      | 7.2                                 | 3                 | 12.8                            | 5.7                                                 | 0.32%                                           |
| 86         | C/D           | 1.0                                      | 3.9                                      | 10.0                                | 15                | 11.5                            | 4.3                                                 | 0.37%                                           |
| 87         | C/D           | 0.2                                      | 4.6                                      | 21.1                                | 7                 | 11.4                            | 3.7                                                 | 0.22%                                           |
| 88         | C/D           | 1.0                                      | 3.1                                      | -1.7                                | 10                | 11.0                            | 3.7                                                 | 0.27%                                           |
| 89         | C/D           | 0.5                                      | 5.5                                      | 15.6                                | 5                 | 10.9                            | 4.3                                                 | 0.14%                                           |

| Facility #       | Facility Type | Avg. downwind distance <sup>1</sup> (km) | Avg. wind speed <sup>2</sup> (m/s, @ 2m) | Approximate ambient temperature (C) | # Accepted plumes | WAFLER (kg/hr CH <sub>4</sub> ) | Unbiased weighted standard deviation WAFLER (kg/hr) | tnWAFLER (as a % of CH <sub>4</sub> throughput) |
|------------------|---------------|------------------------------------------|------------------------------------------|-------------------------------------|-------------------|---------------------------------|-----------------------------------------------------|-------------------------------------------------|
| 90               | C/D           | 1.0                                      | 1.6                                      | 0.0                                 | 6                 | 9.0                             | 2.5                                                 | <0.01%                                          |
| 91               | C/D           | 0.2                                      | 0.7                                      | 10.0                                | 9                 | 8.9                             | 9.1                                                 | 0.07%                                           |
| 92               | C/D           | 1.2                                      | 0.9                                      | -5.6                                | 4                 | 8.7                             | 8.4                                                 | 2.92%                                           |
| 93               | C/D           | 0.7                                      | 3.8                                      | -3.3                                | 5                 | 8.1                             | 4.7                                                 | <0.01%                                          |
| 94               | C/D           | 1.6                                      | 2.2                                      | 5.8                                 | 4                 | 7.5                             | 4.2                                                 | 69.60%                                          |
| 95               | C/D           | 0.3                                      | 2.3                                      | 1.1                                 | 6                 | 7.5                             | 2.3                                                 | 0.03%                                           |
| 96               | C/D           | 1.3                                      | 1.5                                      | 5.6                                 | 18                | 6.1                             | 1.4                                                 | 2.52%                                           |
| 97               | C/D           | 0.9                                      | 2.4                                      | -1.1                                | 12                | 4.6                             | 0.5                                                 | 4.17%                                           |
| 98               | C/D           | 2.1                                      | 6.4                                      | 4.4                                 | 8                 | 2.4                             | 0.6                                                 | 0.45%                                           |
| 99               | C/D           | 0.6                                      | 2.3                                      | -1.1                                | 4                 | 2.0                             | 0.7                                                 | 0.47%                                           |
| 100              | C/D           | 1.0                                      | 2.2                                      | 4.4                                 | 3                 | 1.4                             | 0.5                                                 | N/A                                             |
| 101              | C/D           | 0.5                                      | 3.0                                      | 21.7                                | 8                 | 0.7                             | 0.2                                                 | N/A                                             |
| 102              | C/D/T         | 0.9                                      | 2.5                                      | 14.7                                | 15                | 240.5                           | 148.8                                               | 0.65%                                           |
| 103              | C/D/T         | 1.3                                      | 5.8                                      | 18.3                                | 7                 | 173.7                           | 37.1                                                | 0.07%                                           |
| 104              | C/D/T         | 0.8                                      | 4.0                                      | 6.9                                 | 21                | 142.1                           | 87.1                                                | 1.16%                                           |
| 105              | C/D/T         | 0.4                                      | 1.7                                      | 15.6                                | 11                | 40.4                            | 27.7                                                | 0.07%                                           |
| 106              | C/D/T         | 0.6                                      | 2.9                                      | 23.3                                | 7                 | 34.1                            | 17.2                                                | 0.08%                                           |
| 107              | C/D/T         | 0.3                                      | 4.5                                      | 7.8                                 | 5                 | 28.3                            | 15.1                                                | 0.43%                                           |
| 108              | C/D/T         | 0.2                                      | 3.9                                      | 4.4                                 | 5                 | 20.1                            | 5.6                                                 | 0.28%                                           |
| 109              | C/D/T         | 0.7                                      | 2.4                                      | 12.8                                | 14                | 6.5                             | 2.2                                                 | 0.75%                                           |
| 110              | D             | 0.8                                      | 5.1                                      | -7.5                                | 6                 | 38.0                            | 10.1                                                | 0.69%                                           |
| 111              | D             | 1.6                                      | 1.2                                      | NR                                  | 9                 | 10.6                            | 4.6                                                 | 0.33%                                           |
| 112              | D             | 1.9                                      | 2.7                                      | 1.1                                 | 6                 | 7.8                             | 2.3                                                 | 2.07%                                           |
| 113              | D             | 0.6                                      | 4.4                                      | -3.6                                | 12                | 3.5                             | 2.7                                                 | 0.09%                                           |
| 114              | D             | 2.4                                      | 2.0                                      | 1.7                                 | 3                 | 1.9                             | 0.6                                                 | N/A                                             |
| 115              | D/T           | 0.4                                      | 5.2                                      | 7.2                                 | 8                 | 142.4                           | 49.7                                                | 0.06%                                           |
| 116              | P             | 2.1                                      | 3.0                                      | 8.3                                 | 14                | 606.0                           | 290.7                                               | 0.132%                                          |
| 117              | P             | 1.5                                      | 6.3                                      | 25.3                                | 16                | 451.1                           | 191.9                                               | 0.289%                                          |
| 118 <sup>†</sup> | P             | 0.5                                      | 6.7                                      | 5.0                                 | 16                | 279.4                           | 107.7                                               | 0.041%                                          |
| 119              | P             | 1.6                                      | 5.5                                      | 7.2                                 | 10                | 267.7                           | 141.3                                               | 0.081%                                          |
| 120              | P             | 0.7                                      | 3.7                                      | 7.2                                 | 5                 | 207.1                           | 118.9                                               | 0.202%                                          |
| 121              | P             | 2.1                                      | 5.5                                      | -3.9                                | 12                | 166.6                           | 102.2                                               | 0.622%                                          |
| 122              | P             | 0.8                                      | 4.8                                      | 7.2                                 | 22                | 156.8                           | 147.7                                               | 0.126%                                          |
| 123              | P             | 0.7                                      | 3.2                                      | 4.4                                 | 19                | 128.2                           | 65.7                                                | 0.110%                                          |
| 124              | P             | 2.8                                      | 4.1                                      | NR                                  | 3                 | 112.5                           | 9.5                                                 | 0.078%                                          |
| 125              | P             | 0.4                                      | 6.2                                      | -2.8                                | 14                | 93.2                            | 68.5                                                | 0.040%                                          |
| 126              | P             | 0.8                                      | 3.4                                      | -5.6                                | 6                 | 75.5                            | 26.1                                                | 0.018%                                          |
| 127              | P             | 0.3                                      | 4.3                                      | 8.3                                 | 8                 | 58.4                            | 21.8                                                | 0.016%                                          |
| 128              | P             | 1.5                                      | 6.0                                      | 22.2                                | 6                 | 54.9                            | 21.9                                                | 0.028%                                          |
| 129              | P             | 0.4                                      | 4.0                                      | 14.7                                | 7                 | 39.4                            | 24.1                                                | 0.024%                                          |
| 130              | P             | 0.7                                      | 4.0                                      | 8.6                                 | 18                | 14.1                            | 7.2                                                 | 0.012%                                          |
| 131              | P             | 0.6                                      | 8.5                                      | 0.3                                 | 29                | 3.3                             | 1.3                                                 | 0.350%                                          |

<sup>1</sup> The average distance between the mobile laboratory and tracer release points for accepted plumes.

<sup>2</sup> The average of all wind speed measured at the facility, usually an open area 2m from the ground, for all plumes. Wind speed recorded at the mobile laboratory are used for 11 facilities, and National Weather Service records were used for a single facility.

<sup>†</sup> Analysis performed using linear combination method <sup>5</sup> due to limited road access.

**Table S8:** Minimum, maximum, and quartiles (25<sup>th</sup>, 50<sup>th</sup>, 75<sup>th</sup> percentiles) of facility-level emission rates (FLER) of CH<sub>4</sub> for 130 G&P facilities reported in this study. Percentile values are not applicable to facilities with less than three (3) accepted plumes (indicated by N/A).

| Facility # | Facility Type | # Accepted plumes | WAFLE (kg/hr CH <sub>4</sub> ) | Minimum FLER (kg/hr CH <sub>4</sub> ) | Maximum FLER (kg/hr CH <sub>4</sub> ) | 25 <sup>th</sup> %tile FLER (kg/hr CH <sub>4</sub> ) | 50 <sup>th</sup> %tile FLER (kg/hr CH <sub>4</sub> ) | 75 <sup>th</sup> %tile FLER (kg/hr CH <sub>4</sub> ) |
|------------|---------------|-------------------|--------------------------------|---------------------------------------|---------------------------------------|------------------------------------------------------|------------------------------------------------------|------------------------------------------------------|
| 1          | C             | 6                 | 255.1                          | 157.8                                 | 356.4                                 | 232.1                                                | 304.2                                                | 343.8                                                |
| 2          | C             | 4                 | 94.3                           | 58.4                                  | 188.8                                 | 63.7                                                 | 108.3                                                | 160.5                                                |
| 3          | C             | 27                | 74.5                           | 50.1                                  | 131.3                                 | 61.0                                                 | 71.8                                                 | 81.7                                                 |
| 4          | C             | 9                 | 64.8                           | 12.2                                  | 226.9                                 | 47.1                                                 | 54.3                                                 | 63.4                                                 |
| 5          | C             | 7                 | 62.4                           | 28.3                                  | 84.5                                  | 55.4                                                 | 59.9                                                 | 76.5                                                 |
| 6          | C             | 12                | 43.9                           | 11.9                                  | 100.5                                 | 26.9                                                 | 48.3                                                 | 55.1                                                 |
| 7          | C             | 4                 | 43.8                           | 30.8                                  | 49.9                                  | 33.2                                                 | 40.1                                                 | 47.1                                                 |
| 8          | C             | 7                 | 41.6                           | 8.2                                   | 90.4                                  | 14.5                                                 | 21.9                                                 | 57.7                                                 |
| 9          | C             | 10                | 29.6                           | 21.6                                  | 52.1                                  | 24.4                                                 | 29.2                                                 | 35.2                                                 |
| 10         | C             | 5                 | 28.8                           | 21.8                                  | 39.4                                  | 25.8                                                 | 26.2                                                 | 33.7                                                 |
| 11         | C             | 7                 | 21.9                           | 13.3                                  | 30.7                                  | 18.4                                                 | 18.8                                                 | 26.7                                                 |
| 12         | C             | 3                 | 19.8                           | 16.8                                  | 22.9                                  | N/A                                                  | N/A                                                  | N/A                                                  |
| 13         | C             | 10                | 17.9                           | 13.4                                  | 21.5                                  | 14.8                                                 | 18.5                                                 | 20.0                                                 |
| 14         | C             | 13                | 14.8                           | 11.8                                  | 17.7                                  | 13.4                                                 | 13.7                                                 | 16.1                                                 |
| 15         | C             | 17                | 13.5                           | 9.5                                   | 21.9                                  | 11.4                                                 | 12.7                                                 | 15.3                                                 |
| 16         | C             | 8                 | 9.3                            | 4.8                                   | 30.5                                  | 5.3                                                  | 7.6                                                  | 9.0                                                  |
| 17         | C             | 16                | 9.2                            | 4.8                                   | 18.5                                  | 7.5                                                  | 8.2                                                  | 9.0                                                  |
| 18         | C             | 5                 | 8.4                            | 5.6                                   | 10.5                                  | 8.1                                                  | 9.4                                                  | 9.8                                                  |
| 19         | C             | 2                 | 8.3                            | 5.1                                   | 13.9                                  | N/A                                                  | N/A                                                  | N/A                                                  |
| 20         | C             | 13                | 8.3                            | 3.7                                   | 12.8                                  | 6.2                                                  | 8.7                                                  | 10.0                                                 |
| 21         | C             | 42                | 7.9                            | 3.1                                   | 12.5                                  | 7.2                                                  | 8.0                                                  | 8.7                                                  |
| 22         | C             | 16                | 7.7                            | 3.5                                   | 47.0                                  | 3.7                                                  | 5.3                                                  | 7.6                                                  |
| 23         | C             | 4                 | 7.1                            | 6.5                                   | 8.1                                   | 6.5                                                  | 6.7                                                  | 7.2                                                  |
| 24         | C             | 7                 | 6.2                            | 3.5                                   | 8.1                                   | 5.1                                                  | 6.7                                                  | 7.2                                                  |
| 25         | C             | 6                 | 5.8                            | 4.1                                   | 7.9                                   | 4.8                                                  | 5.3                                                  | 5.7                                                  |
| 26         | C             | 9                 | 5.5                            | 3.7                                   | 6.8                                   | 4.9                                                  | 5.1                                                  | 6.3                                                  |
| 27         | C             | 8                 | 5.2                            | 3.6                                   | 8.1                                   | 4.7                                                  | 5.1                                                  | 5.4                                                  |
| 28         | C             | 8                 | 5.0                            | 0.8                                   | 19.6                                  | 1.7                                                  | 2.3                                                  | 5.5                                                  |
| 29         | C             | 36                | 5.0                            | 2.6                                   | 11.0                                  | 4.2                                                  | 4.7                                                  | 5.4                                                  |
| 30         | C             | 2                 | 3.4                            | 3.1                                   | 3.7                                   | N/A                                                  | N/A                                                  | N/A                                                  |
| 31         | C             | 11                | 2.7                            | 0.2                                   | 8.0                                   | 0.7                                                  | 1.1                                                  | 4.0                                                  |
| 32         | C             | 13                | 1.6                            | 0.7                                   | 4.0                                   | 1.2                                                  | 1.2                                                  | 1.5                                                  |
| 33         | C             | 5                 | 1.2                            | 0.6                                   | 1.9                                   | 0.9                                                  | 1.2                                                  | 1.7                                                  |
| 34         | C             | 3                 | 0.9                            | 0.9                                   | 1.0                                   | N/A                                                  | N/A                                                  | N/A                                                  |
| 35         | C/D           | 2                 | 698.6                          | 653.9                                 | 743.3                                 | N/A                                                  | N/A                                                  | N/A                                                  |
| 36         | C/D           | 5                 | 344.1                          | 190.5                                 | 431.0                                 | 320.5                                                | 374.1                                                | 404.6                                                |
| 37         | C/D           | 8                 | 240.5                          | 155.3                                 | 365.7                                 | 206.5                                                | 240.8                                                | 264.8                                                |
| 38         | C/D           | 5                 | 217.6                          | 143.8                                 | 308.3                                 | 149.0                                                | 199.4                                                | 275.7                                                |
| 39         | C/D           | 18                | 196.1                          | 66.3                                  | 332.0                                 | 158.0                                                | 185.6                                                | 224.8                                                |
| 40         | C/D           | 17                | 195.3                          | 131.3                                 | 349.0                                 | 155.0                                                | 168.1                                                | 254.5                                                |
| 41         | C/D           | 8                 | 159.8                          | 85.2                                  | 305.2                                 | 109.4                                                | 146.0                                                | 178.9                                                |
| 42         | C/D           | 16                | 146.7                          | 66.4                                  | 342.1                                 | 117.3                                                | 128.5                                                | 151.4                                                |
| 43         | C/D           | 23                | 145.2                          | 106.7                                 | 292.0                                 | 131.7                                                | 143.5                                                | 159.8                                                |
| 44         | C/D           | 15                | 119.0                          | 30.0                                  | 369.6                                 | 73.3                                                 | 108.4                                                | 123.0                                                |
| 45         | C/D           | 31                | 112.0                          | 43.3                                  | 252.1                                 | 61.8                                                 | 80.4                                                 | 132.6                                                |
| 46         | C/D           | 6                 | 109.1                          | 30.1                                  | 276.7                                 | 48.1                                                 | 61.0                                                 | 151.8                                                |
| 47         | C/D           | 13                | 106.6                          | 30.8                                  | 201.2                                 | 77.0                                                 | 85.0                                                 | 154.8                                                |

| Facility # | Facility Type | # Accepted plumes | WAFLER (kg/hr CH <sub>4</sub> ) | Minimum FLER (kg/hr CH <sub>4</sub> ) | Maximum FLER (kg/hr CH <sub>4</sub> ) | 25 <sup>th</sup> %tile FLER (kg/hr CH <sub>4</sub> ) | 50 <sup>th</sup> %tile FLER (kg/hr CH <sub>4</sub> ) | 75 <sup>th</sup> %tile FLER (kg/hr CH <sub>4</sub> ) |
|------------|---------------|-------------------|---------------------------------|---------------------------------------|---------------------------------------|------------------------------------------------------|------------------------------------------------------|------------------------------------------------------|
| 48         | C/D           | 11                | 98.6                            | 25.0                                  | 294.6                                 | 34.5                                                 | 64.3                                                 | 116.0                                                |
| 49         | C/D           | 22                | 93.4                            | 70.1                                  | 155.5                                 | 85.1                                                 | 92.3                                                 | 115.8                                                |
| 50         | C/D           | 26                | 92.8                            | 11.3                                  | 220.2                                 | 70.3                                                 | 86.3                                                 | 110.9                                                |
| 51         | C/D           | 6                 | 82.9                            | 48.6                                  | 126.4                                 | 55.2                                                 | 69.6                                                 | 109.8                                                |
| 52         | C/D           | 12                | 76.3                            | 30.6                                  | 139.9                                 | 54.5                                                 | 90.1                                                 | 107.7                                                |
| 53         | C/D           | 12                | 76.0                            | 6.8                                   | 110.3                                 | 70.9                                                 | 89.4                                                 | 104.8                                                |
| 54         | C/D           | 4                 | 71.7                            | 47.8                                  | 87.9                                  | 66.2                                                 | 75.5                                                 | 80.9                                                 |
| 55         | C/D           | 11                | 66.7                            | 15.2                                  | 115.9                                 | 49.5                                                 | 78.2                                                 | 94.1                                                 |
| 56         | C/D           | 8                 | 63.5                            | 9.8                                   | 133.2                                 | 24.7                                                 | 76.9                                                 | 99.8                                                 |
| 57         | C/D           | 8                 | 61.1                            | 42.3                                  | 83.1                                  | 52.6                                                 | 67.8                                                 | 80.3                                                 |
| 58         | C/D           | 7                 | 59.4                            | 38.2                                  | 100.7                                 | 53.2                                                 | 61.7                                                 | 69.7                                                 |
| 59         | C/D           | 8                 | 49.7                            | 22.5                                  | 72.4                                  | 39.0                                                 | 53.1                                                 | 64.8                                                 |
| 60         | C/D           | 18                | 48.6                            | 23.6                                  | 76.8                                  | 42.8                                                 | 49.1                                                 | 57.6                                                 |
| 61         | C/D           | 16                | 47.7                            | 19.6                                  | 110.5                                 | 36.2                                                 | 42.8                                                 | 53.6                                                 |
| 62         | C/D           | 15                | 47.6                            | 13.9                                  | 116.1                                 | 31.3                                                 | 49.4                                                 | 64.6                                                 |
| 63         | C/D           | 18                | 46.8                            | 17.1                                  | 69.6                                  | 36.5                                                 | 45.8                                                 | 51.2                                                 |
| 64         | C/D           | 9                 | 45.1                            | 27.9                                  | 82.8                                  | 32.1                                                 | 36.5                                                 | 57.8                                                 |
| 65         | C/D           | 8                 | 36.4                            | 19.5                                  | 128.8                                 | 24.9                                                 | 28.3                                                 | 35.4                                                 |
| 66         | C/D           | 36                | 35.8                            | 18.2                                  | 66.2                                  | 29.0                                                 | 33.2                                                 | 38.3                                                 |
| 67         | C/D           | 16                | 34.5                            | 25.5                                  | 46.1                                  | 31.3                                                 | 33.5                                                 | 36.9                                                 |
| 68         | C/D           | 3                 | 34.5                            | 24.3                                  | 49.1                                  | N/A                                                  | N/A                                                  | N/A                                                  |
| 69         | C/D           | 8                 | 33.9                            | 13.2                                  | 45.0                                  | 26.8                                                 | 35.2                                                 | 39.6                                                 |
| 70         | C/D           | 17                | 32.7                            | 8.5                                   | 133.6                                 | 20.6                                                 | 26.9                                                 | 39.3                                                 |
| 71         | C/D           | 13                | 26.5                            | 13.5                                  | 47.6                                  | 22.2                                                 | 24.5                                                 | 32.7                                                 |
| 72         | C/D           | 21                | 26.4                            | 11.8                                  | 88.7                                  | 20.0                                                 | 24.5                                                 | 31.7                                                 |
| 73         | C/D           | 12                | 26.2                            | 12.0                                  | 49.2                                  | 21.1                                                 | 24.0                                                 | 40.9                                                 |
| 74         | C/D           | 12                | 26.0                            | 11.0                                  | 57.5                                  | 18.5                                                 | 24.9                                                 | 32.8                                                 |
| 75         | C/D           | 2                 | 25.9                            | 20.9                                  | 30.8                                  | N/A                                                  | N/A                                                  | N/A                                                  |
| 76         | C/D           | 16                | 23.8                            | 5.8                                   | 44.6                                  | 14.1                                                 | 19.6                                                 | 33.2                                                 |
| 77         | C/D           | 6                 | 22.3                            | 7.9                                   | 42.3                                  | 12.9                                                 | 17.8                                                 | 31.7                                                 |
| 78         | C/D           | 8                 | 22.0                            | 19.7                                  | 23.9                                  | 21.4                                                 | 22.0                                                 | 22.9                                                 |
| 79         | C/D           | 26                | 21.7                            | 14.4                                  | 41.0                                  | 18.3                                                 | 20.8                                                 | 22.8                                                 |
| 80         | C/D           | 8                 | 17.9                            | 4.7                                   | 24.3                                  | 14.0                                                 | 17.1                                                 | 23.2                                                 |
| 81         | C/D           | 2                 | 17.7                            | 15.1                                  | 20.3                                  | N/A                                                  | N/A                                                  | N/A                                                  |
| 82         | C/D           | 13                | 15.0                            | 9.9                                   | 28.7                                  | 11.9                                                 | 13.4                                                 | 15.8                                                 |
| 83         | C/D           | 3                 | 13.7                            | 11.7                                  | 15.6                                  | N/A                                                  | N/A                                                  | N/A                                                  |
| 84         | C/D           | 18                | 13.2                            | 7.6                                   | 34.6                                  | 10.5                                                 | 13.9                                                 | 16.2                                                 |
| 85         | C/D           | 3                 | 12.8                            | 8.2                                   | 18.1                                  | N/A                                                  | N/A                                                  | N/A                                                  |
| 86         | C/D           | 15                | 11.5                            | 2.0                                   | 17.4                                  | 7.3                                                  | 11.0                                                 | 14.5                                                 |
| 87         | C/D           | 7                 | 11.4                            | 6.7                                   | 17.8                                  | 8.4                                                  | 10.3                                                 | 13.0                                                 |
| 88         | C/D           | 10                | 11.0                            | 5.8                                   | 16.5                                  | 9.3                                                  | 10.1                                                 | 14.8                                                 |
| 89         | C/D           | 5                 | 10.9                            | 6.5                                   | 17.8                                  | 9.2                                                  | 9.4                                                  | 11.5                                                 |
| 90         | C/D           | 6                 | 9.0                             | 4.7                                   | 10.9                                  | 7.9                                                  | 9.1                                                  | 10.2                                                 |
| 91         | C/D           | 9                 | 8.9                             | 1.7                                   | 28.4                                  | 3.0                                                  | 5.7                                                  | 7.4                                                  |
| 92         | C/D           | 4                 | 8.7                             | 3.1                                   | 21.5                                  | 3.7                                                  | 8.7                                                  | 15.5                                                 |
| 93         | C/D           | 5                 | 8.1                             | 2.8                                   | 11.8                                  | 3.5                                                  | 4.2                                                  | 9.2                                                  |
| 94         | C/D           | 4                 | 7.5                             | 4.1                                   | 12.6                                  | 4.5                                                  | 7.4                                                  | 10.8                                                 |
| 95         | C/D           | 6                 | 7.5                             | 3.7                                   | 9.2                                   | 3.8                                                  | 5.6                                                  | 8.0                                                  |
| 96         | C/D           | 18                | 6.1                             | 3.1                                   | 7.9                                   | 5.4                                                  | 6.3                                                  | 7.1                                                  |
| 97         | C/D           | 12                | 4.6                             | 3.9                                   | 7.5                                   | 4.4                                                  | 4.5                                                  | 4.9                                                  |
| 98         | C/D           | 8                 | 2.4                             | 1.6                                   | 3.4                                   | 2.1                                                  | 2.2                                                  | 2.9                                                  |

| Facility #       | Facility Type | # Accepted plumes | WAFLER (kg/hr CH <sub>4</sub> ) | Minimum FLER (kg/hr CH <sub>4</sub> ) | Maximum FLER (kg/hr CH <sub>4</sub> ) | 25 <sup>th</sup> %tile FLER (kg/hr CH <sub>4</sub> ) | 50 <sup>th</sup> %tile FLER (kg/hr CH <sub>4</sub> ) | 75 <sup>th</sup> %tile FLER (kg/hr CH <sub>4</sub> ) |
|------------------|---------------|-------------------|---------------------------------|---------------------------------------|---------------------------------------|------------------------------------------------------|------------------------------------------------------|------------------------------------------------------|
| 99               | C/D           | 4                 | 2.0                             | 1.5                                   | 2.7                                   | 1.5                                                  | 2.1                                                  | 2.7                                                  |
| 100              | C/D           | 3                 | 1.4                             | 1.1                                   | 2.0                                   | N/A                                                  | N/A                                                  | N/A                                                  |
| 101              | C/D           | 8                 | 0.7                             | 0.5                                   | 1.0                                   | 0.6                                                  | 0.7                                                  | 0.8                                                  |
| 102              | C/D/T         | 15                | 240.5                           | 52.5                                  | 570.4                                 | 113.1                                                | 234.4                                                | 348.4                                                |
| 103              | C/D/T         | 7                 | 173.7                           | 114.5                                 | 248.5                                 | 156.1                                                | 186.6                                                | 195.1                                                |
| 104              | C/D/T         | 21                | 142.1                           | 40.2                                  | 352.9                                 | 75.9                                                 | 120.8                                                | 203.8                                                |
| 105              | C/D/T         | 11                | 40.4                            | 8.5                                   | 104.2                                 | 24.7                                                 | 38.3                                                 | 49.7                                                 |
| 106              | C/D/T         | 7                 | 34.1                            | 15.6                                  | 56.6                                  | 43.5                                                 | 49.4                                                 | 52.9                                                 |
| 107              | C/D/T         | 5                 | 28.3                            | 18.7                                  | 53.8                                  | 19.6                                                 | 24.4                                                 | 26.2                                                 |
| 108              | C/D/T         | 5                 | 20.1                            | 11.3                                  | 25.8                                  | 16.0                                                 | 18.6                                                 | 25.3                                                 |
| 109              | C/D/T         | 14                | 6.5                             | 3.4                                   | 11.9                                  | 5.9                                                  | 6.5                                                  | 7.6                                                  |
| 110              | D             | 6                 | 38.0                            | 21.8                                  | 50.5                                  | 36.4                                                 | 39.1                                                 | 41.0                                                 |
| 111              | D             | 9                 | 10.6                            | 6.7                                   | 20.3                                  | 7.8                                                  | 8.1                                                  | 13.4                                                 |
| 112              | D             | 6                 | 7.8                             | 5.3                                   | 12.2                                  | 7.0                                                  | 7.4                                                  | 7.6                                                  |
| 113              | D             | 12                | 3.5                             | 0.6                                   | 7.4                                   | 1.2                                                  | 2.2                                                  | 6.5                                                  |
| 114              | D             | 3                 | 1.9                             | 1.4                                   | 2.5                                   | N/A                                                  | N/A                                                  | N/A                                                  |
| 115              | D/T           | 8                 | 142.4                           | 45.2                                  | 203.6                                 | 103.4                                                | 143.4                                                | 174.7                                                |
| 116              | P             | 14                | 606.0                           | 116.6                                 | 1,688.1                               | 488.4                                                | 639.2                                                | 742.7                                                |
| 117              | P             | 16                | 451.1                           | 269.7                                 | 1,093.1                               | 335.6                                                | 410.5                                                | 500.2                                                |
| 118 <sup>†</sup> | P             | 16                | 279.4                           | 96.7                                  | 473.5                                 | 197.4                                                | 263.4                                                | 379.2                                                |
| 119              | P             | 10                | 267.7                           | 132.2                                 | 708.5                                 | 218.0                                                | 324.8                                                | 430.8                                                |
| 120              | P             | 5                 | 207.1                           | 80.1                                  | 382.0                                 | 102.8                                                | 192.2                                                | 225.8                                                |
| 121              | P             | 12                | 166.6                           | 19.6                                  | 445.7                                 | 104.2                                                | 163.8                                                | 229.6                                                |
| 122              | P             | 22                | 156.8                           | 3.4                                   | 577.2                                 | 86.7                                                 | 125.6                                                | 203.8                                                |
| 123              | P             | 19                | 128.2                           | 61.4                                  | 272.2                                 | 94.9                                                 | 121.6                                                | 179.6                                                |
| 124              | P             | 3                 | 112.5                           | 103.0                                 | 122.0                                 | N/A                                                  | N/A                                                  | N/A                                                  |
| 125              | P             | 14                | 93.2                            | 10.2                                  | 200.7                                 | 30.4                                                 | 53.1                                                 | 105.3                                                |
| 126              | P             | 6                 | 75.5                            | 54.4                                  | 131.2                                 | 56.8                                                 | 69.9                                                 | 88.9                                                 |
| 127              | P             | 8                 | 58.4                            | 22.9                                  | 87.2                                  | 45.4                                                 | 54.0                                                 | 71.7                                                 |
| 128              | P             | 6                 | 54.9                            | 27.6                                  | 86.6                                  | 36.5                                                 | 45.3                                                 | 60.1                                                 |
| 129              | P             | 7                 | 39.4                            | 12.0                                  | 86.2                                  | 26.3                                                 | 30.5                                                 | 47.1                                                 |
| 130              | P             | 18                | 14.1                            | 3.5                                   | 30.8                                  | 9.0                                                  | 11.9                                                 | 20.1                                                 |
| 131              | P             | 29                | 3.3                             | 1.6                                   | 9.4                                   | 2.6                                                  | 3.2                                                  | 3.8                                                  |

<sup>†</sup> Analysis performed using linear combination method <sup>5</sup> due to limited road access.

## I – Measurements of intermittent methane release events

**Table S9.** Summary of observed intermittent methane release events, including description of event, number of accepted plumes sampled during an event, and the average methane emissions from all accepted plumes. Event duration was not estimated, but it was only a small fraction of the several hour period during which plumes were collected at each of these facilities.

| Facility # | Facility type | Intermittent event description         | Accepted plumes | Average emissions (kg/hr CH <sub>4</sub> ) |
|------------|---------------|----------------------------------------|-----------------|--------------------------------------------|
| 42         | C/D           | Compressor blowdown(s)                 | 2               | 243                                        |
| 65         | C/D           | Compressor blowdown(s)                 | 2               | 1,826                                      |
| 49         | C/D           | Compressor startup                     | 1               | 744                                        |
| 3          | C             | Methane release onsite, origin unknown | 1               | 1,460                                      |
| 109        | C/D/T         | Compressor blowdown(s)                 | 4               | 55                                         |

## **J – Downwind recovery of exhaust stack methane**

Uncombusted methane in engine or turbine exhaust (“exhaust stack methane”) can be an important source of methane emissions from facilities equipped with compressors. This is especially true for engines, which emit more than 40-times as much methane per horsepower than turbines.<sup>8</sup> This exhaust is emitted from elevated stacks (up to 12 meters for engines, and 18 meters to turbines) at high temperature (up to 540°C) and high velocity (up to 45 m/s). The contribution of these elevated emissions can be difficult to fully characterize with ground based tracer flux measurements, especially if the measurements are made close to the facility before the plumes have become fully mixed. In theory the problem can be mitigated by making measuring further downwind, which increases the probability of dispersion of all emissions with the tracer gases. However, unfavorable winds and/or limited downwind road access hampered efforts to measure these emissions at some facilities. In addition, signal-to-noise becomes more of a problem further downwind. Figure S4 presents an example of tracer flux measurements conducted at a facility with limited downwind road access. The lack of any CO signal in the plume suggests that the measured methane in this plume were not associated with combustion exhaust.



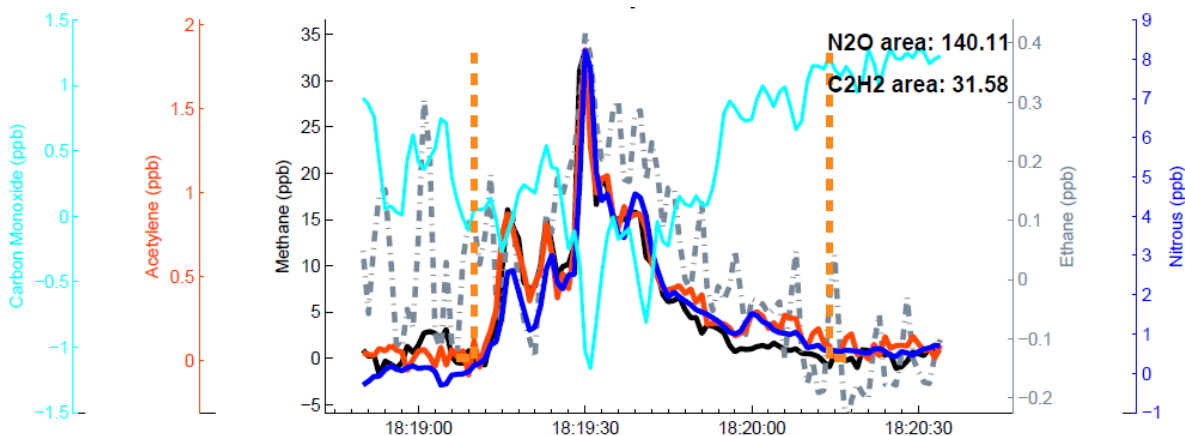

**Figure S4.** Time series of downwind plume at facility #95, including methane (black), ethane (dashed), nitrous (blue), acetylene (red), and carbon monoxide (turquoise). Carbon monoxide is in the noise despite strong signals from methane and tracer gases. Low recovery of exhaust stack methane in compressor engine exhaust is likely because measurements were conducted <250m downwind from this gathering facility

Each facility was analyzed to assess the potential bias in WAFLER from low recovery of uncombusted methane emissions in the exhaust of reciprocating engines and turbines. A database of ~1,900 compressor engines (>200HP) at O&G facilities in New Mexico<sup>9</sup> was analyzed to obtain the 75<sup>th</sup> and 90<sup>th</sup> percentiles of stack height, exhaust temperature, and exhaust flow rate. From these data, two lofted plume scenarios, WC1 and WC2 in Table S10, were generated. To reflect differences between large and small engines, the WC1 scenario was applied to each of the study facilities with an average reciprocating engine horsepower <1,000, and WC2 was applied to all study facilities with >1,000 horsepower, on average. All facilities with turbines had >1,000 horsepower, on average. These scenarios are designed to produce worst-case scenarios of plume rise.

**Table S10.** Summary of lofted plume scenarios, WC1 and WC2, used in dispersion modeling. Assuming a 20:1 fuel ratio, exhaust flow rate was estimated from the stack diameter and exhaust velocity reported for each engine in the New Mexico database.

| Worst-case scenarios | Stack height (m) | Exhaust temperature (°C) | Exhaust flow rate (cfm) | Applies to |
|----------------------|------------------|--------------------------|-------------------------|------------|
| WC1                  | 7.6              | 527                      | 7,715                   | < 1,000 HP |
| WC2                  | 12.2             | 679                      | 12,527                  | ≥ 1,000 HP |

Roscioli et al.<sup>5</sup> analyzed WC1 and WC2 using a Gaussian dispersion model with Briggs plume rise equations<sup>10</sup>. Table S11 provides the minimum downwind distances to recover 30%, 50%, and 80% of exhaust stack methane under both scenarios calculated for three atmospheric stability classes A, B, and C. For each facility, the average wind speed at 10m during measurements (assumed to be 50% greater than the facility wind speed, which was measured at a height of 2m) was used to determine which atmospheric stability class applied. Class A applied with average wind speed <3 m/s, B with average wind speed <5m/s, and C otherwise. Moderate solar insolation was assumed for all facilities.

**Table S11.** Minimum downwind distances (meters) for three levels of exhaust stack methane recovery, 80%, 50%, and 30%.

| Class    | A     |       |       | B     |       |       | C     |       |       |
|----------|-------|-------|-------|-------|-------|-------|-------|-------|-------|
| Recovery | 80%   | 50%   | 30%   | 80%   | 50%   | 30%   | 80%   | 50%   | 30%   |
| WC1      | 1,566 | 960   | 706   | 1,839 | 921   | 618   | 2,524 | 1,195 | 794   |
| WC2      | 2,015 | 1,380 | 1,077 | 2,817 | 1,546 | 1,097 | 4,330 | 2,094 | 1,453 |

Worst-case recovery of exhaust stack methane recovery was then determined from the average downwind distance (between the tracer release points and mobile lab) of accepted plumes. For example, given average reciprocating engine horsepower >1,000 and average wind speed <3 m/s during measurement, a worst-case recovery of 50% would be applied to this

facility if the average downwind distance of accepted plumes was 1,600 meters. A worst-case recovery of 10% of exhaust stack methane was assumed for all facilities with an average downwind distance less than the minimum for 30% recovery. Table S12 includes the worst-case recovery estimates for each facility. For a majority of facilities, less than 50% recovery of exhaust stack methane is the worst-case.

Using worst-case recovery, a worst-case WAFLER (WC-WAFLER) is calculated for each facility. WC-WAFLER is equal to WAFLER plus the product of unrecovered methane emissions  $(1 - \text{Recovery})$  and an estimate of combustion-related emissions. The combustion-related emissions estimates are derived from AP-42 emissions factors, which account for the thermal efficiency of operating reciprocating engines and turbines. Thermal efficiency was estimated from horsepower data and engine characteristics (i.e., lean burn vs. rich burn, and two-stroke vs. four stroke), which are given in SI B, Table S3, as well as corresponding information gathered from manufacturers.

Potential bias in WAFLER is then assessed as the ratio of WAFLER to WC-WAFLER. Figure S5 presents a histogram of the ratios of WAFLER to WC-WAFLER. Though AP-42 emissions factors are uncertain, this analysis provides a conservative assessment of bias given the worst-case assumptions used to calculate recovery.

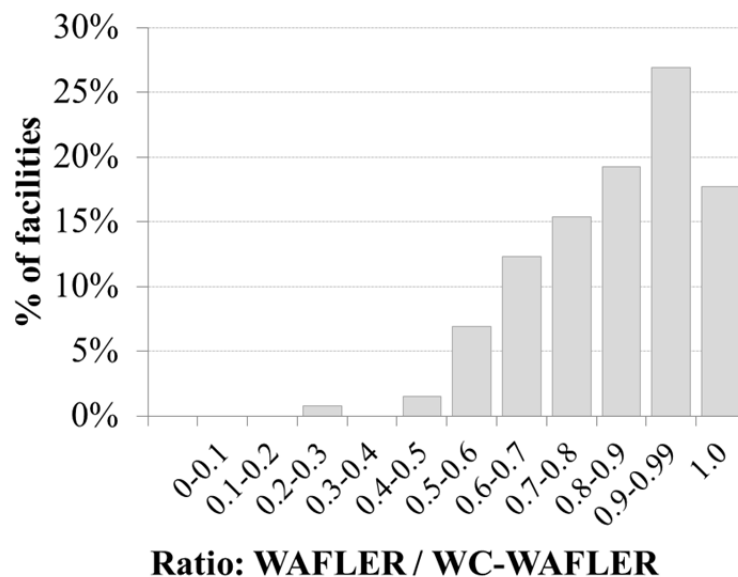

**Figure S5.** Histogram of the ratios of WAFLER to worst-case WAFLER (WC-WAFLER) assuming worst-case recovery of uncombusted methane emissions in the exhaust of natural-gas powered operating reciprocating engines and turbines. WAFLER is  $\geq 70\%$  of WC-WAFLER at 79% of facilities, and  $\geq 90\%$  at 45% of facilities. At 20 facilities with electric motors or no operating compressors, the uncombusted methane emissions are zero.

Figure S5 supports the conclusion that partial recovery of combustion-related methane emissions may create a modest bias in WAFLER ( $<30\%$ ) at 79% of facilities. Importantly, the magnitude of this bias is less than the standard deviation of methane WAFLER at most facilities. The actual levels of bias are likely lower because the tracers at many facilities were released upwind of compressors, increasing the time for tracer gases to lift and co-disperse with exhaust gases. The tracers were also released from elevated points ( $>2\text{m}$ ) at some facilities, improving the co-dispersion of exhaust stack methane with the tracer(s). This analysis also shows that significant bias, due to the low recovery of combustion-related methane emissions, is likely for about 5-20% of facilities in this study, particularly those with limited downwind road access. The methane WAFLER estimates reported for these facilities are probably lower than actual methane emissions rates. The methane WAFLER for Facility #95 (Figure S4), may be only

about 20% of actual emissions. For 27 facilities, methane WAFLER may be underestimated by as much as 30-50%. As reported in the main text, this bias has a small impact relative to the normalized methane emissions from all gathering facilities and processing plants. However, it needs to be considered how low recovery of exhaust stack methane could impact the distribution of emissions and subsequent extrapolation.

**Table S12.** Average downwind distance and wind speed, climate stability class, worst case recovery (%) of uncombusted methane emissions from reciprocating engine and turbine exhaust, estimated methane emissions using the AP-42 method, and the ratio of WAFLER to WC-WAFLER. Ratios of WAFLER to WC-WAFLER <0.7 are highlighted, indicating facilities with the highest likelihood of underestimated emissions due to low recovery of uncombusted methane emissions.

| Facility # | Facility Type | Avg. downwind distance <sup>1</sup> (km) | Avg. wind speed <sup>2</sup> (m/s, @2m) | Climate stability class | % Recovery of uncombusted methane emissions (worst-case) | Estimated methane emissions: AP-42 method (kg/hr) | Ratio: WAFLER / WC-WAFLER |
|------------|---------------|------------------------------------------|-----------------------------------------|-------------------------|----------------------------------------------------------|---------------------------------------------------|---------------------------|
| 1          | C             | 2.9                                      | 3.3                                     | B                       | 80%                                                      | 28.2                                              | 0.98                      |
| 2          | C             | 0.5                                      | 1.3                                     | A                       | 10%                                                      | 12.4                                              | 0.89                      |
| 3          | C             | 0.5                                      | 3.0                                     | B                       | 10%                                                      | 0.6                                               | 0.99                      |
| 4          | C             | 2.1                                      | 4.4                                     | C                       | 50%                                                      | 9.9                                               | 0.93                      |
| 5          | C             | 0.8                                      | 1.7                                     | A                       | 30%                                                      | 15.6                                              | 0.85                      |
| 6          | C             | 0.9                                      | 1.9                                     | A                       | 10%                                                      | 25.2                                              | 0.66                      |
| 7          | C             | 1.8                                      | 6.4                                     | C                       | 30%                                                      | 6.0                                               | 0.91                      |
| 8          | C             | 0.4                                      | 3.7                                     | C                       | 10%                                                      | 15.6                                              | 0.75                      |
| 9          | C             | 0.5                                      | 2.4                                     | B                       | 10%                                                      | 14.8                                              | 0.69                      |
| 10         | C             | 2.0                                      | 4.0                                     | C                       | 30%                                                      | 16.8                                              | 0.71                      |
| 11         | C             | 1.0                                      | 2.5                                     | B                       | 10%                                                      | 0.5                                               | 0.98                      |
| 12         | C             | 0.6                                      | 2.5                                     | B                       | 10%                                                      | 0.1                                               | 0.99                      |
| 13         | C             | 0.8                                      | 3.4                                     | C                       | 30%                                                      | 9.9                                               | 0.72                      |
| 14         | C             | 0.9                                      | 2.6                                     | B                       | 10%                                                      | 7.5                                               | 0.69                      |
| 15         | C             | 1.2                                      | 9.1                                     | C                       | 10%                                                      | 2.0                                               | 0.88                      |
| 16         | C             | 0.7                                      | 2.3                                     | B                       | 10%                                                      | 9.9                                               | 0.51                      |
| 17         | C             | 1.6                                      | 3.8                                     | C                       | 30%                                                      | 5.5                                               | 0.70                      |
| 18         | C             | 1.9                                      | 5.7                                     | C                       | 30%                                                      | 4.9                                               | 0.71                      |
| 19         | C             | 1.0                                      | 2.1                                     | B                       | 50%                                                      | 3.0                                               | 0.85                      |
| 20         | C             | 0.6                                      | 4.2                                     | C                       | 10%                                                      | 4.1                                               | 0.69                      |
| 21         | C             | 1.1                                      | 4.2                                     | C                       | 100%                                                     | -                                                 | 1.00                      |

| Facility # | Facility Type | Avg. downwind distance <sup>1</sup> (km) | Avg. wind speed <sup>2</sup> (m/s, @2m) | Climate stability class | % Recovery of uncombusted methane emissions (worst-case) | Estimated methane emissions: AP-42 method (kg/hr) | Ratio: WAFLE / WC-WAFLE |
|------------|---------------|------------------------------------------|-----------------------------------------|-------------------------|----------------------------------------------------------|---------------------------------------------------|-------------------------|
| 22         | C             | 1.0                                      | 4.2                                     | C                       | 30%                                                      | 0.4                                               | 0.97                    |
| 23         | C             | 0.2                                      | 4.5                                     | C                       | 10%                                                      | 1.6                                               | 0.83                    |
| 24         | C             | 0.6                                      | 5.9                                     | C                       | 10%                                                      | 6.0                                               | 0.53                    |
| 25         | C             | 1.1                                      | 4.7                                     | C                       | 30%                                                      | 0.3                                               | 0.96                    |
| 26         | C             | 0.6                                      | 5.7                                     | C                       | 10%                                                      | 1.3                                               | 0.83                    |
| 27         | C             | 0.5                                      | 5.1                                     | C                       | 10%                                                      | 1.3                                               | 0.82                    |
| 28         | C             | 0.7                                      | 1.5                                     | A                       | 100%                                                     | -                                                 | 1.00                    |
| 29         | C             | 0.8                                      | 4.3                                     | C                       | 10%                                                      | 1.4                                               | 0.80                    |
| 30         | C             | 0.3                                      | 8.4                                     | C                       | 10%                                                      | 0.3                                               | 0.93                    |
| 31         | C             | 1.0                                      | 6.3                                     | C                       | 30%                                                      | 0.1                                               | 0.96                    |
| 32         | C             | 0.2                                      | 5.3                                     | C                       | 100%                                                     | -                                                 | 1.00                    |
| 33         | C             | 1.0                                      | 6.4                                     | C                       | 30%                                                      | 0.6                                               | 0.76                    |
| 34         | C             | 0.3                                      | 7.0                                     | C                       | 10%                                                      | 0.8                                               | 0.54                    |
| 35         | C/D           | 1.0                                      | 2.4                                     | B                       | 50%                                                      | 1.9                                               | 1.00                    |
| 36         | C/D           | 0.5                                      | 5.1                                     | C                       | 10%                                                      | 33.3                                              | 0.92                    |
| 37         | C/D           | 1.1                                      | 3.5                                     | C                       | 10%                                                      | 28.7                                              | 0.90                    |
| 38         | C/D           | 1.5                                      | 1.7                                     | A                       | 50%                                                      | 35.8                                              | 0.92                    |
| 39         | C/D           | 0.7                                      | 4.1                                     | C                       | 10%                                                      | 62.9                                              | 0.78                    |
| 40         | C/D           | 0.5                                      | 2.1                                     | B                       | 10%                                                      | 14.8                                              | 0.94                    |
| 41         | C/D           | 0.8                                      | 0.6                                     | A                       | 10%                                                      | 21.5                                              | 0.89                    |
| 42         | C/D           | 1.8                                      | 10.2                                    | C                       | 30%                                                      | 35.8                                              | 0.85                    |
| 43         | C/D           | 2.0                                      | 8.5                                     | C                       | 30%                                                      | 16.9                                              | 0.92                    |
| 44         | C/D           | 0.8                                      | 2.3                                     | B                       | 10%                                                      | 43.0                                              | 0.75                    |
| 45         | C/D           | 0.5                                      | 3.3                                     | B                       | 10%                                                      | 16.5                                              | 0.88                    |
| 46         | C/D           | 1.9                                      | 1.2                                     | A                       | 50%                                                      | 26.9                                              | 0.89                    |
| 47         | C/D           | 0.8                                      | 2.9                                     | B                       | 10%                                                      | 39.7                                              | 0.75                    |
| 48         | C/D           | 1.0                                      | 3.8                                     | C                       | 10%                                                      | 48.5                                              | 0.69                    |
| 49         | C/D           | 0.7                                      | 4.3                                     | C                       | 10%                                                      | 43.0                                              | 0.71                    |
| 50         | C/D           | 0.7                                      | 7.4                                     | C                       | 10%                                                      | 16.6                                              | 0.86                    |
| 51         | C/D           | 3.1                                      | 1.8                                     | A                       | 80%                                                      | 9.9                                               | 0.98                    |
| 52         | C/D           | 0.5                                      | 4.3                                     | C                       | 10%                                                      | 28.7                                              | 0.75                    |
| 53         | C/D           | 0.4                                      | 2.0                                     | A                       | 100%                                                     | -                                                 | 1.00                    |
| 54         | C/D           | 0.6                                      | 2.8                                     | B                       | 10%                                                      | 22.2                                              | 0.78                    |
| 55         | C/D           | 0.6                                      | 2.1                                     | B                       | 10%                                                      | 42.1                                              | 0.64                    |
| 56         | C/D           | 0.6                                      | 2.7                                     | B                       | 10%                                                      | 3.8                                               | 0.95                    |
| 57         | C/D           | 1.3                                      | 7.2                                     | C                       | 10%                                                      | 11.1                                              | 0.86                    |
| 58         | C/D           | 0.6                                      | 3.3                                     | B                       | 10%                                                      | 14.8                                              | 0.82                    |
| 59         | C/D           | 0.7                                      | 3.5                                     | C                       | 10%                                                      | 1.9                                               | 0.97                    |

| Facility # | Facility Type | Avg. downwind distance <sup>1</sup> (km) | Avg. wind speed <sup>2</sup> (m/s, @2m) | Climate stability class | % Recovery of uncombusted methane emissions (worst-case) | Estimated methane emissions: AP-42 method (kg/hr) | Ratio: WAFLER / WC-WAFLER |
|------------|---------------|------------------------------------------|-----------------------------------------|-------------------------|----------------------------------------------------------|---------------------------------------------------|---------------------------|
| 60         | C/D           | 2.5                                      | 4.9                                     | C                       | 50%                                                      | 1.4                                               | 0.99                      |
| 61         | C/D           | 0.4                                      | 4.2                                     | C                       | 10%                                                      | 11.1                                              | 0.83                      |
| 62         | C/D           | 1.0                                      | 2.6                                     | B                       | 10%                                                      | 25.3                                              | 0.68                      |
| 63         | C/D           | 1.0                                      | 2.5                                     | B                       | 50%                                                      | 1.8                                               | 0.98                      |
| 64         | C/D           | 1.2                                      | 2.4                                     | B                       | 30%                                                      | 53.8                                              | 0.54                      |
| 65         | C/D           | 1.5                                      | 11.1                                    | C                       | 10%                                                      | 27.9                                              | 0.59                      |
| 66         | C/D           | 0.6                                      | 5.3                                     | C                       | 10%                                                      | 5.5                                               | 0.88                      |
| 67         | C/D           | 1.4                                      | 9.1                                     | C                       | 50%                                                      | 5.3                                               | 0.93                      |
| 68         | C/D           | 0.4                                      | 4.9                                     | C                       | 10%                                                      | 16.7                                              | 0.70                      |
| 69         | C/D           | 0.7                                      | 2.8                                     | B                       | 10%                                                      | 21.5                                              | 0.64                      |
| 70         | C/D           | 1.5                                      | 8.1                                     | C                       | 50%                                                      | 5.5                                               | 0.92                      |
| 71         | C/D           | 0.9                                      | 1.8                                     | A                       | 10%                                                      | 14.3                                              | 0.67                      |
| 72         | C/D           | 0.4                                      | 8.9                                     | C                       | 10%                                                      | 10.7                                              | 0.73                      |
| 73         | C/D           | 0.7                                      | 2.7                                     | B                       | 10%                                                      | 11.0                                              | 0.73                      |
| 74         | C/D           | 1.7                                      | 2.7                                     | B                       | 50%                                                      | 5.8                                               | 0.90                      |
| 75         | C/D           | 0.4                                      | 3.4                                     | C                       | 10%                                                      | 2.5                                               | 0.92                      |
| 76         | C/D           | 1.1                                      | 4.1                                     | C                       | 10%                                                      | 28.7                                              | 0.48                      |
| 77         | C/D           | 1.7                                      | 4.6                                     | C                       | 30%                                                      | 5.5                                               | 0.85                      |
| 78         | C/D           | 0.9                                      | 5.5                                     | C                       | 10%                                                      | 1.1                                               | 0.96                      |
| 79         | C/D           | 1.1                                      | 5.9                                     | C                       | 10%                                                      | 1.2                                               | 0.95                      |
| 80         | C/D           | 0.7                                      | 2.5                                     | B                       | 30%                                                      | 1.7                                               | 0.94                      |
| 81         | C/D           | 0.2                                      | 3.4                                     | C                       | 10%                                                      | 0.6                                               | 0.97                      |
| 82         | C/D           | 2.1                                      | 6.1                                     | C                       | 30%                                                      | 2.6                                               | 0.89                      |
| 83         | C/D           | 0.2                                      | 2.2                                     | B                       | 10%                                                      | 14.1                                              | 0.52                      |
| 84         | C/D           | 0.4                                      | 4.5                                     | C                       | 10%                                                      | 2.6                                               | 0.85                      |
| 85         | C/D           | 0.2                                      | 5.4                                     | C                       | 10%                                                      | 5.6                                               | 0.72                      |
| 86         | C/D           | 1.0                                      | 3.9                                     | C                       | 10%                                                      | 5.5                                               | 0.70                      |
| 87         | C/D           | 0.2                                      | 4.6                                     | C                       | 10%                                                      | 9.9                                               | 0.56                      |
| 88         | C/D           | 1.0                                      | 3.1                                     | B                       | 50%                                                      | 5.6                                               | 0.80                      |
| 89         | C/D           | 0.5                                      | 5.5                                     | C                       | 10%                                                      | 8.3                                               | 0.59                      |
| 90         | C/D           | 1.0                                      | 1.6                                     | A                       | 10%                                                      | 0.5                                               | 0.95                      |
| 91         | C/D           | 0.2                                      | 0.7                                     | A                       | 10%                                                      | 10.7                                              | 0.48                      |
| 92         | C/D           | 1.2                                      | 0.9                                     | A                       | 100%                                                     | -                                                 | 1.00                      |
| 93         | C/D           | 0.7                                      | 3.8                                     | C                       | 10%                                                      | 0.5                                               | 0.94                      |
| 94         | C/D           | 1.6                                      | 2.2                                     | B                       | 50%                                                      | 0.4                                               | 0.98                      |
| 95         | C/D           | 0.3                                      | 2.3                                     | B                       | 10%                                                      | 28.7                                              | 0.22                      |
| 96         | C/D           | 1.3                                      | 1.5                                     | A                       | 50%                                                      | 0.3                                               | 0.98                      |
| 97         | C/D           | 0.9                                      | 2.4                                     | B                       | 30%                                                      | 0.2                                               | 0.98                      |

| Facility # | Facility Type | Avg. downwind distance <sup>1</sup> (km) | Avg. wind speed <sup>2</sup> (m/s, @2m) | Climate stability class | % Recovery of uncombusted methane emissions (worst-case) | Estimated methane emissions: AP-42 method (kg/hr) | Ratio: WAFLER / WC-WAFLER |
|------------|---------------|------------------------------------------|-----------------------------------------|-------------------------|----------------------------------------------------------|---------------------------------------------------|---------------------------|
| 98         | C/D           | 2.1                                      | 6.4                                     | C                       | 50%                                                      | 3.1                                               | 0.61                      |
| 99         | C/D           | 0.6                                      | 2.3                                     | B                       | 100%                                                     | -                                                 | 1.00                      |
| 100        | C/D           | 1.0                                      | 2.2                                     | B                       | 100%                                                     | -                                                 | 1.00                      |
| 101        | C/D           | 0.5                                      | 3.0                                     | B                       | 100%                                                     | -                                                 | 1.00                      |
| 102        | C/D/T         | 0.9                                      | 2.5                                     | B                       | 10%                                                      | 16.8                                              | 0.94                      |
| 103        | C/D/T         | 1.3                                      | 5.8                                     | C                       | 10%                                                      | 0.4                                               | 1.00                      |
| 104        | C/D/T         | 0.8                                      | 4.0                                     | C                       | 10%                                                      | 19.7                                              | 0.89                      |
| 105        | C/D/T         | 0.4                                      | 1.7                                     | A                       | 10%                                                      | 20.8                                              | 0.68                      |
| 106        | C/D/T         | 0.6                                      | 2.9                                     | B                       | 10%                                                      | 10.4                                              | 0.78                      |
| 107        | C/D/T         | 0.3                                      | 4.5                                     | C                       | 10%                                                      | 14.8                                              | 0.68                      |
| 108        | C/D/T         | 0.2                                      | 3.9                                     | C                       | 10%                                                      | 19.7                                              | 0.53                      |
| 109        | C/D/T         | 0.7                                      | 2.4                                     | B                       | 100%                                                     | -                                                 | 1.00                      |
| 110        | D             | 0.8                                      | 5.1                                     | C                       | 100%                                                     | -                                                 | 1.00                      |
| 111        | D             | 1.6                                      | 1.2                                     | A                       | 100%                                                     | -                                                 | 1.00                      |
| 112        | D             | 1.9                                      | 2.7                                     | B                       | 100%                                                     | -                                                 | 1.00                      |
| 113        | D             | 0.6                                      | 4.4                                     | C                       | 100%                                                     | -                                                 | 1.00                      |
| 114        | D             | 2.4                                      | 2.0                                     | B                       | 100%                                                     | -                                                 | 1.00                      |
| 115        | D/T           | 0.4                                      | 5.2                                     | C                       | 100%                                                     | -                                                 | 1.00                      |
| 116        | P             | 2.1                                      | 3.0                                     | B                       | 50%                                                      | 109.0                                             | 0.92                      |
| 117        | P             | 1.5                                      | 6.3                                     | C                       | 30%                                                      | 20.0                                              | 0.97                      |
| 118        | P             | 0.5                                      | 6.7                                     | C                       | 10%                                                      | 3.0                                               | 0.99                      |
| 119        | P             | 1.6                                      | 5.5                                     | C                       | 30%                                                      | 134.4                                             | 0.74                      |
| 120        | P             | 0.7                                      | 3.7                                     | C                       | 10%                                                      | 0.8                                               | 1.00                      |
| 121        | P             | 2.1                                      | 5.5                                     | C                       | 30%                                                      | 53.4                                              | 0.82                      |
| 122        | P             | 0.8                                      | 4.8                                     | C                       | 30%                                                      | 39.4                                              | 0.85                      |
| 123        | P             | 0.7                                      | 3.2                                     | B                       | 10%                                                      | 73.6                                              | 0.66                      |
| 124        | P             | 2.8                                      | 4.1                                     | C                       | 50%                                                      | 41.5                                              | 0.84                      |
| 125        | P             | 0.4                                      | 6.2                                     | C                       | 100%                                                     | -                                                 | 1.00                      |
| 126        | P             | 0.8                                      | 3.4                                     | C                       | 10%                                                      | 48.7                                              | 0.63                      |
| 127        | P             | 0.3                                      | 4.3                                     | C                       | 10%                                                      | 1.4                                               | 0.98                      |
| 128        | P             | 1.5                                      | 6.0                                     | C                       | 30%                                                      | 9.6                                               | 0.89                      |
| 129        | P             | 0.4                                      | 4.0                                     | C                       | 10%                                                      | 0.5                                               | 0.99                      |
| 130        | P             | 0.7                                      | 4.0                                     | C                       | 100%                                                     | -                                                 | 1.00                      |
| 131        | P             | 0.6                                      | 8.5                                     | C                       | 10%                                                      | 1.0                                               | 0.78                      |

<sup>1</sup> The average distance between the mobile laboratory and tracer release points for accepted plumes.

<sup>2</sup> The average of all wind speed measured at the facility, usually an open area 2m from the ground, for all plumes. Wind speed measurements recorded at the mobile laboratory are used for 11 facilities, and National Weather Service records are used for a single facility.



## K – Comparison of facility level emissions at processing plants

**Table S13.** Summary of facility-level data reported by Shorter et al.<sup>11</sup>, including facility-level methane emissions rate estimates for seven processing plants and two gathering facilities. Measurements were performed with tracer flux methods.

| Area  | Test# | Facility Type                | Capacity (tonnes/hr) | Methane emissions (kg/hr) |            |                | Recip # | Dehy # |
|-------|-------|------------------------------|----------------------|---------------------------|------------|----------------|---------|--------|
|       |       |                              |                      | Canister                  | Mobile lab | Final estimate |         |        |
| West  | 1     | Gas Plant                    | 32                   | 124                       | -          | 124            | 13      | -      |
| West  | 2     | Gas Plant                    | 32                   | 98                        | 44         | 45             | 13      | -      |
| West  | 6     | Gas Plant                    | 104                  | -                         | 69         | 69             | 4       | -      |
| TX/LA | 1     | Production                   | 20                   | 161                       | 123        | 142            | 4       | 2      |
| TX/LA | 12    | Gas Plant                    | 56                   | 887                       | 789        | 838            | 6       | -      |
| TX/LA | 13    | Gas Plant                    | 80                   | 162                       | 141        | 152            | 7       | -      |
| TX/LA | 14    | Gas Plant                    | 60                   | 76                        | 115        | 95             | 4       | -      |
| West  | 5     | Gathering Compressor Station | -                    | -                         | 86         | 86             | 2       | -      |
| West  | 6     | Compressor Station           | -                    | -                         | 115        | 115            | 3       | -      |

**Table S14.** Summary of data collected by National Gas Machinery Laboratory<sup>12</sup> and Picard et al.<sup>13</sup>, including facility-level methane emissions rate estimates for nine processing plants (eight unique). Emissions rates are the sum of emissions estimated from component and process-level calculations and measurements.

| Study                                          | Plant # | Natural gas throughput (tonnes/hr) | Methane emissions rate (kg/hr) |
|------------------------------------------------|---------|------------------------------------|--------------------------------|
| National Gas Machinery Laboratory (NGML), 2006 | 1       | 401                                | 217                            |
|                                                | 2       | 165                                | 18                             |
|                                                | 3       | 104                                | 94                             |
|                                                | 4       | 36                                 | 55                             |
|                                                | 5       | 70                                 | 339                            |
| Picard et al, 2002                             | 1       | 43                                 | 139                            |
|                                                | 2       | 48                                 | 171                            |
|                                                | 3       | 169                                | 513                            |
|                                                | 4       | 96                                 | 279                            |

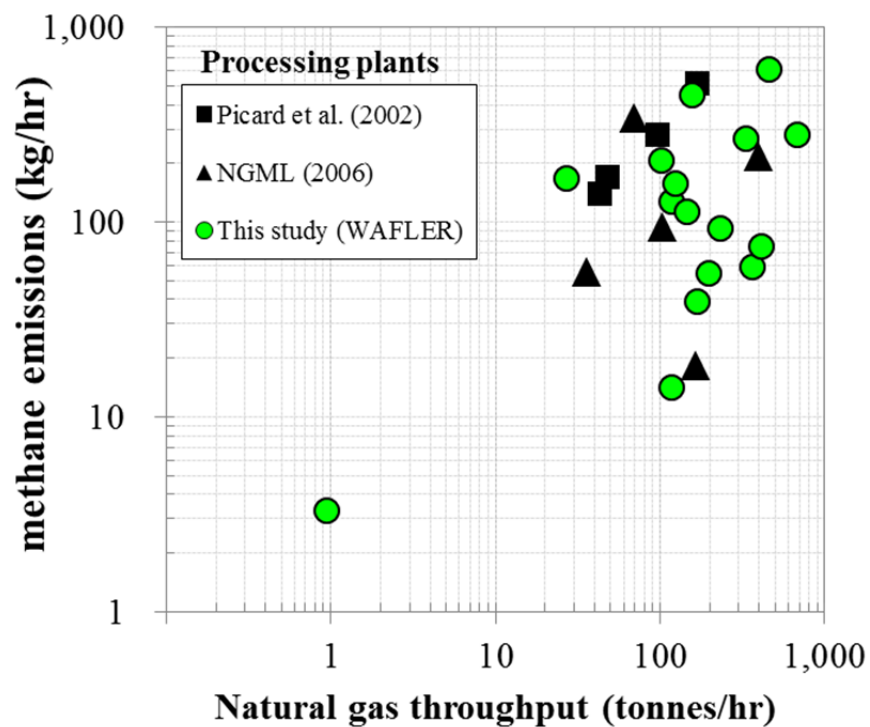

**Figure S6.** Previously reported methane emissions rates (kg/hr) for nine processing plants<sup>12,13</sup> and WAFLE estimates obtained for 16 processing plants in this study versus natural gas throughput (tonnes/hr).

## **L – Multiple linear least squares regression variables and results**

Multiple linear least squares regressions were performed on gathering facilities to investigate the influence of different factors on WAFLER. The purpose was exploratory, to have a greater understanding of relevant factors and to incorporate qualitative observations made in the field. The independent variables considered were gas composition, engine and turbine horsepower (total and operating), total and CH<sub>4</sub> throughput, equipment counts (compressors, dehydration units, and pneumatics), pressure (inlet, outlet, delta, and ratio), AP-42 methane emissions estimates, and ambient temperature. Included were binary (dummy) variables for facility type (C, C/D, etc.), company, primary driver type (turbine), engine types (rich-burn and two-stroke), presence of collocated non-partner equipment, and onsite observations of leaking and/or venting. Two-way interactions (horsepower \* inlet pressure and throughput/inlet pressure) were also included to describe the logical relationships between these variables.

All gathering facilities with positive throughput (108 out of 114) were used in the regression. (Facility #59 was not included because it is not a unique data point.) Numerous model variants were explored, controlling each step to avoid strongly correlated independent variables being introduced to the model (e.g., total and operating reciprocating engine horsepower). Models using WAFLER or tnWAFLER as the dependent variable resulted in coefficients that were highly sensitive to a few facilities. The final regression model, which is presented in the text, uses ln-WAFLER as the dependent variable. The significant parameters are ln-throughput, delta pressure, and dummy variables for turbines being the primary driver type and observation of substantial venting from liquids storage tanks. The model has an adjusted r-square of 0.66, and a Root Mean Square Error of 0.76. Figure S7 presents predicted WAFLER versus measured WAFLER.

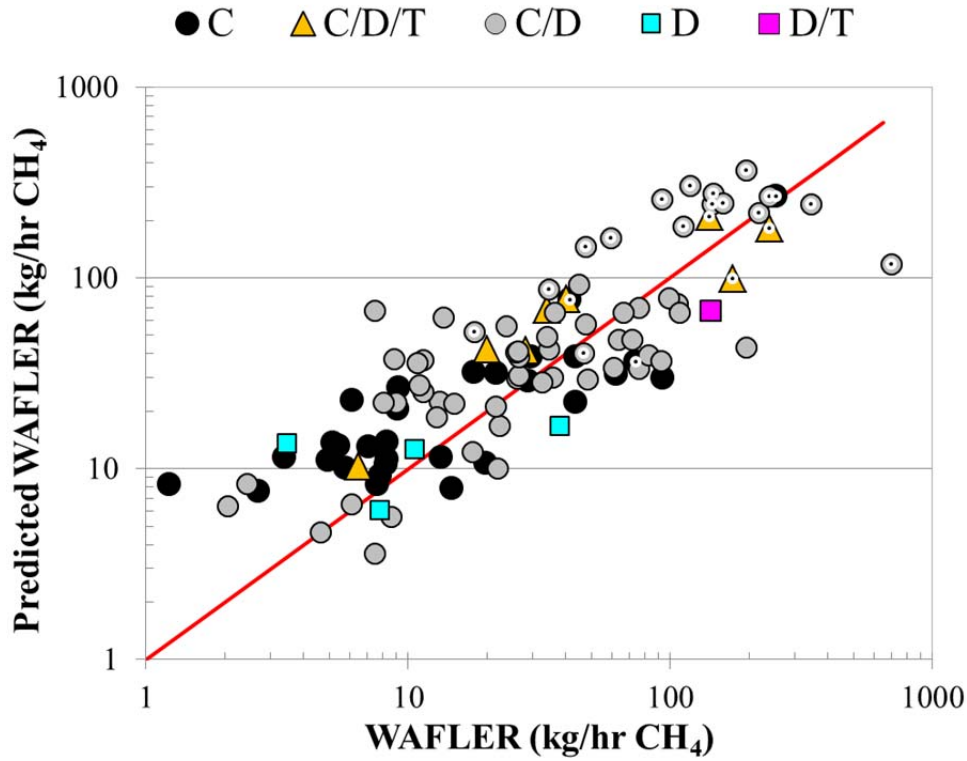

**Figure S7.** Predicted versus measured WAFLER (in log scale). Facility types are indicated by their respective shapes and colors. Facilities flagged with observation of substantial venting from liquids storage tanks are indicated by concentric black and white circles (22 total). Predicted WAFLER adjusted using standard error of the regression  $[\hat{y} = \exp\left(\frac{\hat{\sigma}}{2}\right) \exp(\ln \widehat{WAFLER})]$ <sup>14</sup>.

Coefficients of the model are provided in Table S15. The coefficient for the independent variable delta pressure describes a percentage change in ln-WAFLER. The coefficient of ln-throughput describes a percentage change in ln-WAFLER from a percentage change in ln-throughput. The coefficients of the dummy variables are interpreted differently, quantifying the relative (%) differences between the means of flagged and non-flagged facilities. The % difference in level scale is determined by using the exponential function  $[100 * (\exp(\beta_i) - 1)]$ <sup>15</sup>.

**Table S15.** Regression model results, including average and 95<sup>th</sup> percentile values for the coefficients, as well as their respective standard error (SE), t-stats, and p-values. All coefficients are significant at the 95% confidence level.

| Model coefficients <sup>1</sup> | Description                   | Average | 2.5%    | 97.5%   | SE      | t-stat | p-value |
|---------------------------------|-------------------------------|---------|---------|---------|---------|--------|---------|
|                                 | Intercept                     | 1.57    |         |         |         |        |         |
| $\beta_1$                       | Primary driver type (turbine) | (1.36)  | (2.00)  | (0.71)  | 0.32    | -4.2   | <0.0001 |
| $\beta_2$                       | ln CH4 throughput             | 0.39    | 0.30    | 0.47    | 0.04    | 9.0    | <0.0001 |
| $\beta_3$                       | Delta pressure                | 8.1E-04 | 4.1E-04 | 1.2E-03 | 2.1E-04 | 4.0    | 0.0001  |
| $\beta_4$                       | Substantial venting (tank)    | 1.40    | 1.02    | 1.77    | 0.19    | 7.4    | <0.0001 |

<sup>1</sup>Equation form:  $\ln\_WAFLE = 1.57 - 1.36 * turbine\_driven + 0.39 * \ln\_throughput + 8.1 * 10^{-4} * \Delta pressure + 1.4 * tank\_vent$

Multiple diagnostic plots for the regression model are provided. Figure S8 presents a histogram of regression residuals. Importantly, the residuals appear to be normally distributed with a mean near zero. Regression residuals versus predicted WAFLE are plotted in Figure S9. There are no apparent trends with the regression residuals and predicted WAFLE. Figure S10 is a plot of Cook's distance<sup>16</sup> versus observed minus predicted ln-WAFLE. Cook's distance indicates the most influential data points. While the Cook's distances for 11 facilities are greater than three times the average, these influential data points are well distributed, resulting in a regression model that is insensitive to any single data point. To verify, regression model coefficients were re-calculated after individually excluding facilities with the largest Cook's distance. As an example, Table S16 includes the regression model coefficients excluding facility #35, which was flagged for substantial venting, had the largest Cook's distance, and had the highest methane WAFLE of 700 kg/hr. The coefficient for major tank emissions decreases to 1.29 (from 1.40), which is a small change in relative terms. The other coefficients are essentially unchanged.

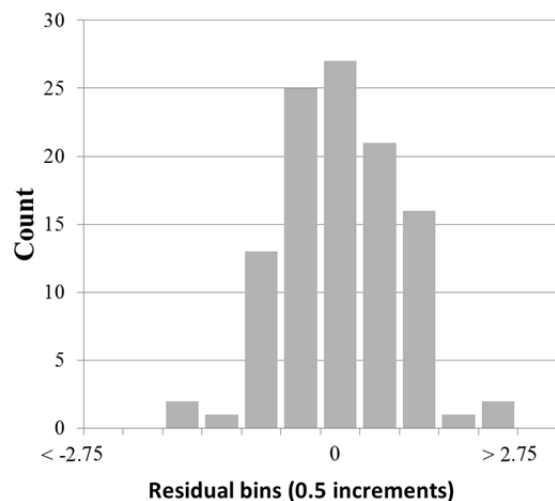

**Figure S8.** Histogram of regression residuals in bin increments of 0.5. The residuals are approximately normal and centered at zero.

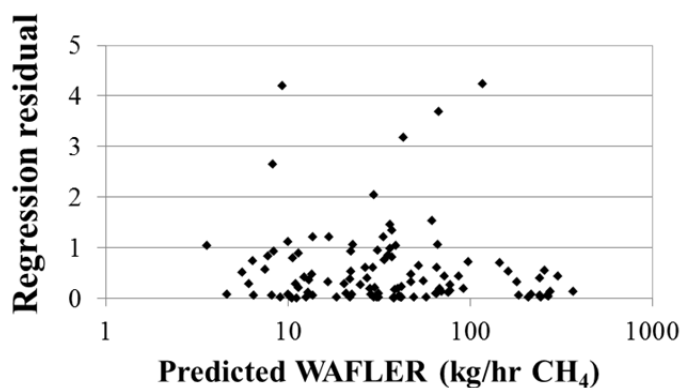

**Figure S9.** Regression residuals versus predicted WAFLER (log scale). There are no apparent trends with the regression residuals and predicted WAFLER.

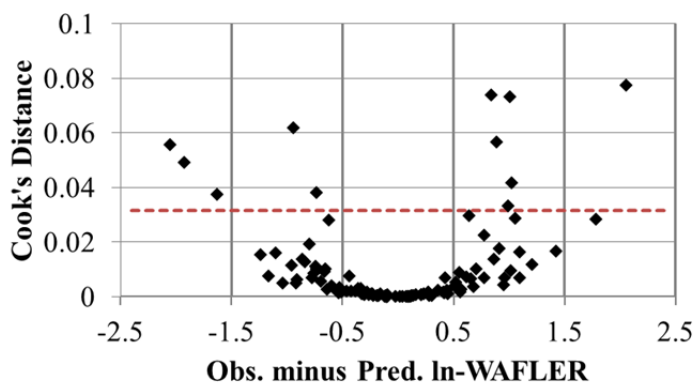

**Figure S10.** Cook's distance versus observed minus predicted ln-WAFLER. Dashed line indicates three times the average Cook's distance. 11 data points are above the dashed line, but are well distributed among the other 97 data points.

**Table S16.** Regression model results excluding facility #35, including average and 95<sup>th</sup> percentile values for the coefficients. Facility #35 was flagged for substantial venting, had the largest Cook's distance, and had the highest methane WAFLER of 700 kg/hr.

| Model coefficients | Description                   | Average | 2.5%    | 97.5%   |
|--------------------|-------------------------------|---------|---------|---------|
|                    | Intercept                     | 1.55    |         |         |
| $\beta_1$          | Primary driver type (turbine) | (1.35)  | (1.97)  | (0.73)  |
| $\beta_2$          | ln CH4 throughput             | 0.39    | 0.31    | 0.47    |
| $\beta_3$          | Delta pressure                | 8.4E-04 | 4.4E-04 | 1.2E-03 |
| $\beta_4$          | Substantial venting (tank)    | 1.29    | 0.92    | 1.66    |

## M – Summary of high emitters

In the companion paper detailing the tracer flux methodology used in this study, Roscioli et al.<sup>5</sup> demonstrated that specific methane emissions sources may be targeted through strategic placement of tracer release points. Out of the 23 gathering facilities flagged for substantial methane emissions from liquids storage tanks, estimates for the magnitude of these emissions could be obtained for five, Table S17. At six other facilities, it appeared that *most* of the methane emissions were due to substantial tank venting, but the contribution of tank venting to WAFLER could not be isolated from other emissions sources.

**Table S17.** AP-42 emissions, natural gas throughput, tnWAFLER, and WAFLER of gathering facilities flagged for substantial tank venting (23 total). At five facilities the magnitudes of methane emissions due to tank venting have been estimated. At six other facilities most of the emissions appeared to be due to tank venting, but emissions from other sources could not be quantified separately. Issues reported by company personnel regarding causes of substantial methane emissions and other observed emissions sources are noted.

| Facility # | Facility Type | AP-42 emissions (kg/hr) | Facility Natural Gas Throughput (tonnes/hr) | tnWAFLER (% of CH <sub>4</sub> throughput) | WAFLER (kg/hr CH <sub>4</sub> ) | Emissions due to substantial tank venting | Noted issue associated with substantial tank venting | Other observed emissions sources              |
|------------|---------------|-------------------------|---------------------------------------------|--------------------------------------------|---------------------------------|-------------------------------------------|------------------------------------------------------|-----------------------------------------------|
| 1          | C             | 28.2                    | 29.7                                        | 1.11%                                      | 255.1                           | -                                         | -                                                    | Compressor venting                            |
| 3          | C             | 0.6                     | 0.5                                         | 17.52%                                     | 74.5                            | -                                         | -                                                    | -                                             |
| 4          | C             | 9.9                     | -                                           |                                            | 64.8                            | Most                                      | -                                                    | -                                             |
| 8          | C             | 15.6                    | 5.1                                         | 0.90%                                      | 41.6                            | ~10 kg/hr <sup>‡</sup>                    | -                                                    | -                                             |
| 35         | C/D           | 1.9                     | 7.7                                         | 9.54%                                      | 698.6                           | ~650 kg/hr <sup>†</sup>                   | Stuck dump valve on first stage scrubber             | -                                             |
| 36         | C/D           | 33.3                    | 34.1                                        | 1.09%                                      | 344.1                           | -                                         | -                                                    | Compressor and dehydrator venting             |
| 37         | C/D           | 28.7                    | 25.7                                        | 0.98%                                      | 240.5                           | Most                                      | Float dump valve stuck open                          | Compressor and dehydrator venting; pneumatics |
| 38         | C/D           | 35.8                    | 20.9                                        | 1.12%                                      | 217.6                           | -                                         | -                                                    | -                                             |
| 39         | C/D           | 62.9                    | 52.2                                        | 0.39%                                      | 196.1                           | Most                                      | Stuck vent valve                                     | Three leaky valves                            |
| 41         | C/D           | 21.5                    | 165.3                                       | 0.10%                                      | 159.8                           | -                                         | -                                                    | -                                             |
| 42         | C/D           | 35.8                    | 28.1                                        | 0.59%                                      | 146.7                           | -                                         | -                                                    | -                                             |
| 43         | C/D           | 16.9                    | 22.5                                        | 0.76%                                      | 145.2                           | Most                                      | Open thief hatch                                     | -                                             |



| Facility # | Facility Type | AP-42 emissions (kg/hr) | Facility Natural Gas Throughput (tonnes/hr) | tnWAFLER (% of CH <sub>4</sub> throughput) | WAFLER (kg/hr CH <sub>4</sub> ) | Emissions due to substantial tank venting | Noted issue associated with substantial tank venting | Other observed emissions sources          |
|------------|---------------|-------------------------|---------------------------------------------|--------------------------------------------|---------------------------------|-------------------------------------------|------------------------------------------------------|-------------------------------------------|
| 44         | C/D           | 43.0                    | 35.3                                        | 0.36%                                      | 119.0                           | -                                         | -                                                    | Pneumatics                                |
| 45         | C/D           | 16.5                    | 18.9                                        | 0.75%                                      | 112.0                           | ~70 kg/hr <sup>‡</sup>                    | -                                                    | Compressor crank-case / rod packing vents |
| 49         | C/D           | 43.0                    | 23.8                                        | 0.41%                                      | 93.4                            | -                                         | -                                                    | -                                         |
| 58         | C/D           | 14.8                    | 18.9                                        | 0.40%                                      | 59.4                            | -                                         | Pressure relief valve seated improperly              | -                                         |
| 61         | C/D           | 11.1                    | 7.5                                         | 0.84%                                      | 47.7                            | ~23 kg/hr <sup>‡</sup>                    | Combustor not operating                              | Leaking compressor pipe                   |
| 63         | C/D           | 1.8                     | 0.3                                         | 17.08%                                     | 46.8                            | -                                         | -                                                    | Pneumatics; engines                       |
| 67         | C/D           | 5.3                     | 1.8                                         | 2.16%                                      | 34.5                            | Most                                      | -                                                    | -                                         |
| 80         | C/D           | 1.7                     | 0.6                                         | 3.04%                                      | 17.9                            | -                                         | -                                                    | Pneumatics                                |
| 102        | C/D/T         | 16.8                    | 48.2                                        | 0.65%                                      | 240.5                           | ~290 kg/hr <sup>†</sup>                   | -                                                    | Leak at pig launcher                      |
| 103        | C/D/T         | 0.4                     | 321.0                                       | 0.07%                                      | 173.7                           | -                                         | -                                                    | -                                         |
| 104        | C/D/T         | 19.7                    | 15.2                                        | 1.16%                                      | 142.1                           | Most                                      | -                                                    | Compressor rod packing vent               |

<sup>†</sup> Estimated from average emissions before and after changes to emissions from tanks.

<sup>‡</sup> Estimated using linear combination<sup>5</sup>.

**Table S18.** Other potentially substantial emissions sources noted by onsite observer for gathering facilities (facilities in Table S17 are not included).

| Facility # | Facility Type | AP-42 emissions (kg/hr) | Facility Natural Gas Throughput (tonnes/hr) | tnWAFLER (% of CH <sub>4</sub> throughput) | WAFLER (kg/hr CH <sub>4</sub> ) | Noted emissions sources                                     |
|------------|---------------|-------------------------|---------------------------------------------|--------------------------------------------|---------------------------------|-------------------------------------------------------------|
| 7          | C             | 6.0                     | 5.1                                         | 1.03%                                      | 43.8                            | Leaks from pressure relief valves                           |
| 14         | C             | 7.5                     | 0.2                                         | 8.45%                                      | 14.8                            | Leaky valve; Compressor vents                               |
| 40         | C/D           | 14.8                    | 10.5                                        | 2.44%                                      | 195.3                           | Leaky pipe near compressor                                  |
| 51         | C/D           | 9.9                     | 8.0                                         | 1.35%                                      | 82.9                            | Tank venting; four compressors venting from fuel line purge |
| 56         | C/D           | 3.8                     | 17.7                                        | 0.38%                                      | 63.5                            | Pneumatic valve leaking; rod packing vents                  |
| 92         | C/D           | -                       | 0.4                                         | 2.92%                                      | 8.7                             | Dehydrator venting                                          |
| 94         | C/D           | 0.4                     | 0.014                                       | 69.60%                                     | 7.5                             | Leaky pipe union                                            |
| 96         | C/D           | 0.3                     | 0.25                                        | 2.52%                                      | 6.1                             | Dehydrator venting                                          |
| 97         | C/D           | 0.2                     | 0.12                                        | 4.17%                                      | 4.6                             | Leak from line heater                                       |
| 112        | D             | -                       | 0.5                                         | 2.07%                                      | 7.8                             | Dehydrator venting                                          |

## N – Cumulative distributions for C and C/D facilities

Figure S11 presents cumulative distributions of WAFLER and tnWAFLER for C and C/D gathering facilities, the two classes of facility with the largest sample sizes. The distributions are presented as a percentage of cumulative throughput. Facility-level tnWAFLER estimates are also shown.

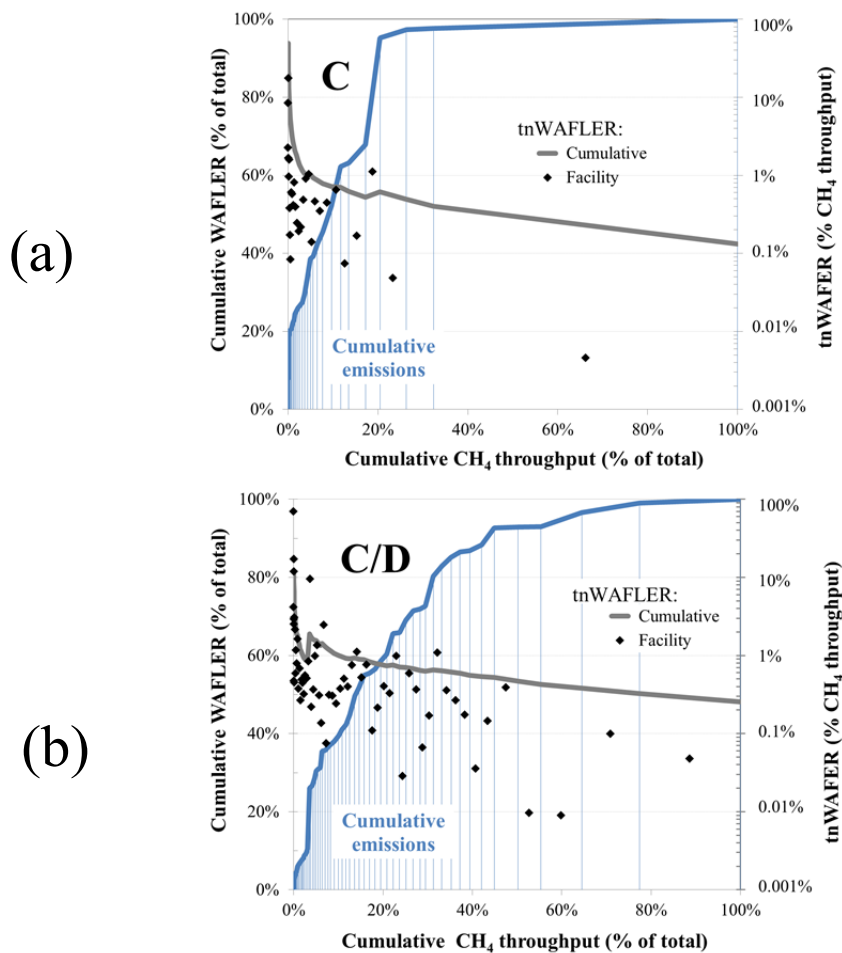

**Figure S11.** Cumulative methane emissions (solid curve) for (a) C and (b) C/D facilities ranked by throughput (low to high). Also plotted are the normalized methane emissions: tnWAFLER (symbols) and cumulative tnWAFLER (dashed line). (Included are three C facilities and two C/D facilities that had zero throughput but were still emitting methane.)

Figure S11 shows that the methane emissions from C and C/D facilities are highly skewed. For example, for the C facilities (Figure S11(a)), nearly 50% of the emissions came from 25 facilities that contributed less than 10% of the cumulative CH<sub>4</sub> throughput. However, facility #11, the highest throughput C gathering facility sampled, accounted for more than 60% of the aggregate throughput (487 tonnes/hr). This facility had a WAFLE<sub>R</sub> of  $22 \pm 6.3$  kg/hr (0.005% of CH<sub>4</sub> throughput). Without this facility, the cumulative normalized methane emissions across all C facilities was 0.40%, but with it falls to 0.13%. This highlights the sensitivity of normalized methane emission rates to highly-skewed emissions.

Figure S11(b) shows that C/D facilities' methane emissions are somewhat less skewed than for the C facilities, with 50% of the methane emissions coming from 20% of methane throughput. The cumulative tnWAFLE<sub>R</sub> across all C/D facilities is 0.26%. The highest tnWAFLE<sub>R</sub> estimates are, again, associated with the smallest throughput facilities.

## References

- (1) U.S. Energy Information Administration, Natural Gas Wellhead Value and Marketed Production, (Energy Information Administration, Washington, DC, 2013).
- (2) U.S. Energy Information Administration, Natural Gas Annual Respondent Query System (EIA-757 Data through 2012), (Energy Information Administration, Washington, DC, 2012).
- (3) Oil & Gas Journal, Worldwide Gas Processing Survey, (Corporation, P., Houston, TX, 2014).
- (4) U.S. Energy Information Administration *Emissions of Greenhouse Gases in the United States, Appendix E*; U.S. Department of Energy, Washington, DC, 1997.
- (5) Joseph R. Roscioli; Tara I. Yacovitch; Cody Floerchinger; Austin L. Mitchell; Daniel S. Tkacik; R. Subramanian; David M. Martinez; Timothy L. Vaughn; Laurie Williams; Dan Zimmerle, et al., Measurements of methane emissions from natural gas gathering facilities and processing plants: measurement methods. *Atmospheric Measurement Techniques Discussion* 2014, 7, 12357–12406.
- (6) Lamb, B.; Shorter, J. H.; McManus, J. B.; Kolb, C. E.; Mosher, B. W.; Harriss, R. C.; Allwine, E. J.; Blaha, D.; Siverson, R.; Howard, T., et al., Development of Atmospheric Tracer Methods to Measure Methane Emissions from Natural Gas Facilities and Urban Areas. *Env. Sci. & Tech.* **1995**, 29, 1468-1479.
- (7) Caulton, D. R.; Shepson, P. B.; Santoro, R. L.; Sparks, J. P.; Howarth, R. W.; Ingraffea, A. R.; Cambaliza, M. O. L.; Sweeney, C.; Karion, A.; Davis, K. J., et al., Toward a better understanding and quantification of methane emissions from shale gas development. *Proceedings of the National Academy of Sciences* **2014**.
- (8) Theresa M. Shires; Harrison, M. R. *Methane Emissions from Vented and Combustion Sources*; Radian International LLC: 1996.
- (9) Peters, E., Oil & Gas Sources, (New Mexico Environment Department, Santa Fe, NM, 2014). Air Quality Bureau,
- (10) Seinfeld, J. H.; Pandis, S. N., *Atmospheric chemistry and physics: From air pollution to climate change*. John Wiley & Sons Inc.: New York, 2006.
- (11) Shorter, J. H.; McManus, J. B.; Kolb, C. E.; Lamb, B.; Siverson, R.; Allwine, E.; Westberg, H.; Mosher, B.; Harriss, R. *Results of Tracer Measurements of Methane Emissions From Natural Gas System Facilities*; Gas Research Institute: 1995.
- (12) National Gas Machinery Laboratory; Clearstone Engineering Ltd.; Innovative Environmental Solutions, I. *Cost-Effective Directed Inspection and Maintenance Control Opportunities at Five Gas Processing Plants and Upstream Gathering Compressor Stations and Well Sites*; U.S. Environmental Protection Agency: 2006; p 74.
- (13) Picard, D. J.; M., S.; Ross, B. *Identification and Evaluation of Opportunities to Reduce Methane Losses at Four Gas Processing Plants*; Gas Technology Institute, U.S. Environmental Protection Agency, Des Plaines, IL, 2002; p 141.
- (14) Wooldridge, J. M., *Introductory Econometrics*. 2 ed.; South-Western: 2002.

- (15) Hardy, M. A., *Regression with Dummy Variables*. Sage Publications, Inc.: Newbury Park, CA, 1993.
- (16) Cook, R. D., Detectin of Influential Observations in Linear Regression. *Technometrics* **1977**, *19*, (1), 15-18.
